# Supplementary material
Source: PubMed Central journal article supplement (PMC10593733)
Supplement: 43657_2022_90_MOESM1_ESM.pdf [file 43657_2022_90_MOESM1_ESM.pdf]

## Supplementary material

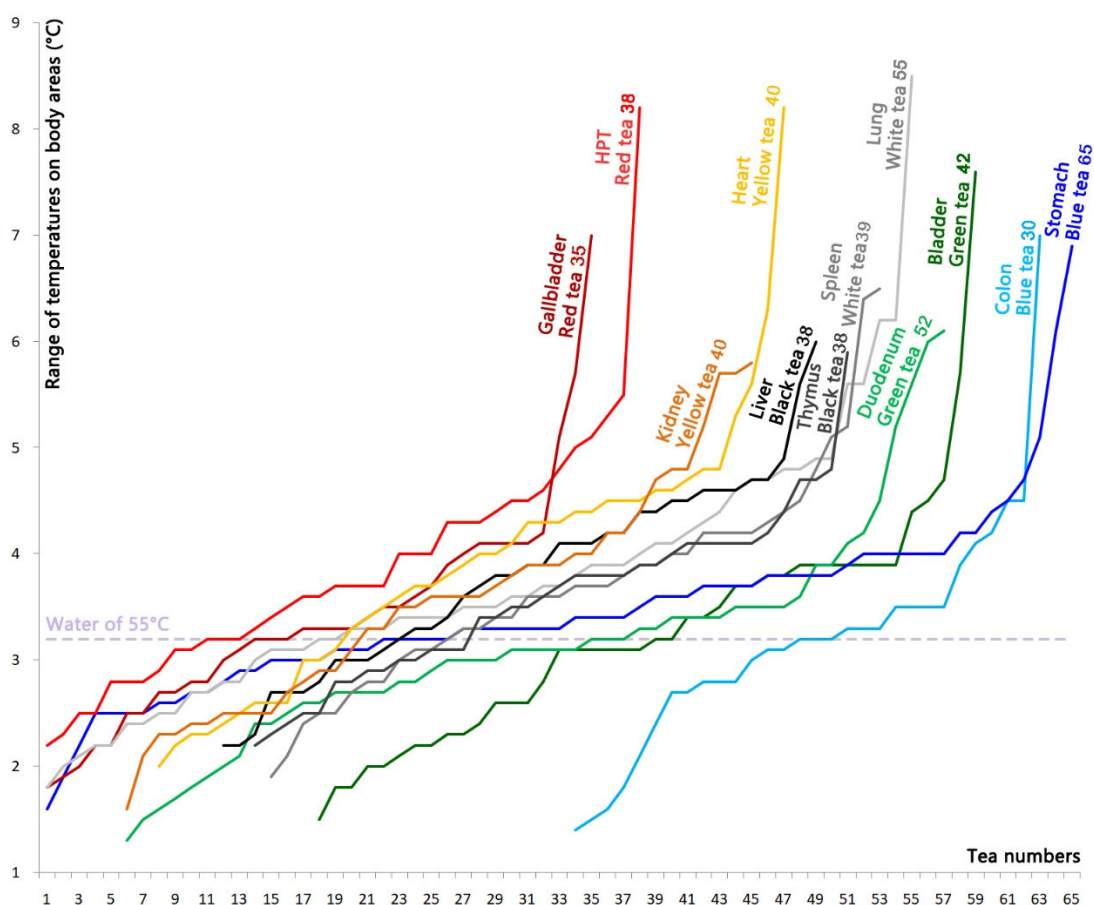

### Supplementary Fig. 1 Range of the maximum temperature of the twelve body areas right after drinking each of the 512 kinds of tea

Totally 512 kinds of tea were tested in our preliminary experiment. According to the temperature rise on the different body area after drinking different tea, these kinds of tea were classified into twelve types. The maximum temperatures of the twelve body areas were recorded in one minute after drinking each tea of the 512 kinds, the range of maximum temperatures among the twelve body areas were calculated for each tea and data were displayed in twelve lines in ascending order. Here, X-axis is just the ascending order of each of the twelve types of tea. Each type was displayed in a separate line. The start points of the lines are not aligned for a clear display of the temperature range. An average range after drinking warm water (55°C as the temperatures of all other tea soups) were displayed as a reference ( $3.2 \pm 0.7^\circ\text{C}$ ). Actually, different from hundreds of types of tea, repeats of warm water are just the same type of drink, and therefore a horizontal line will be proper to represent the data of warm water. Large variations were observed among the tea kinds within each type of tea. These kinds of tea with the largest range of temperature of the twelve types were selected for further experiments of this study. Two kinds of tea were selected for stomach area as they raise the temperature in different areas of stomach, either cardia or pylorus. Most tea names were omitted to avoid competing interests.

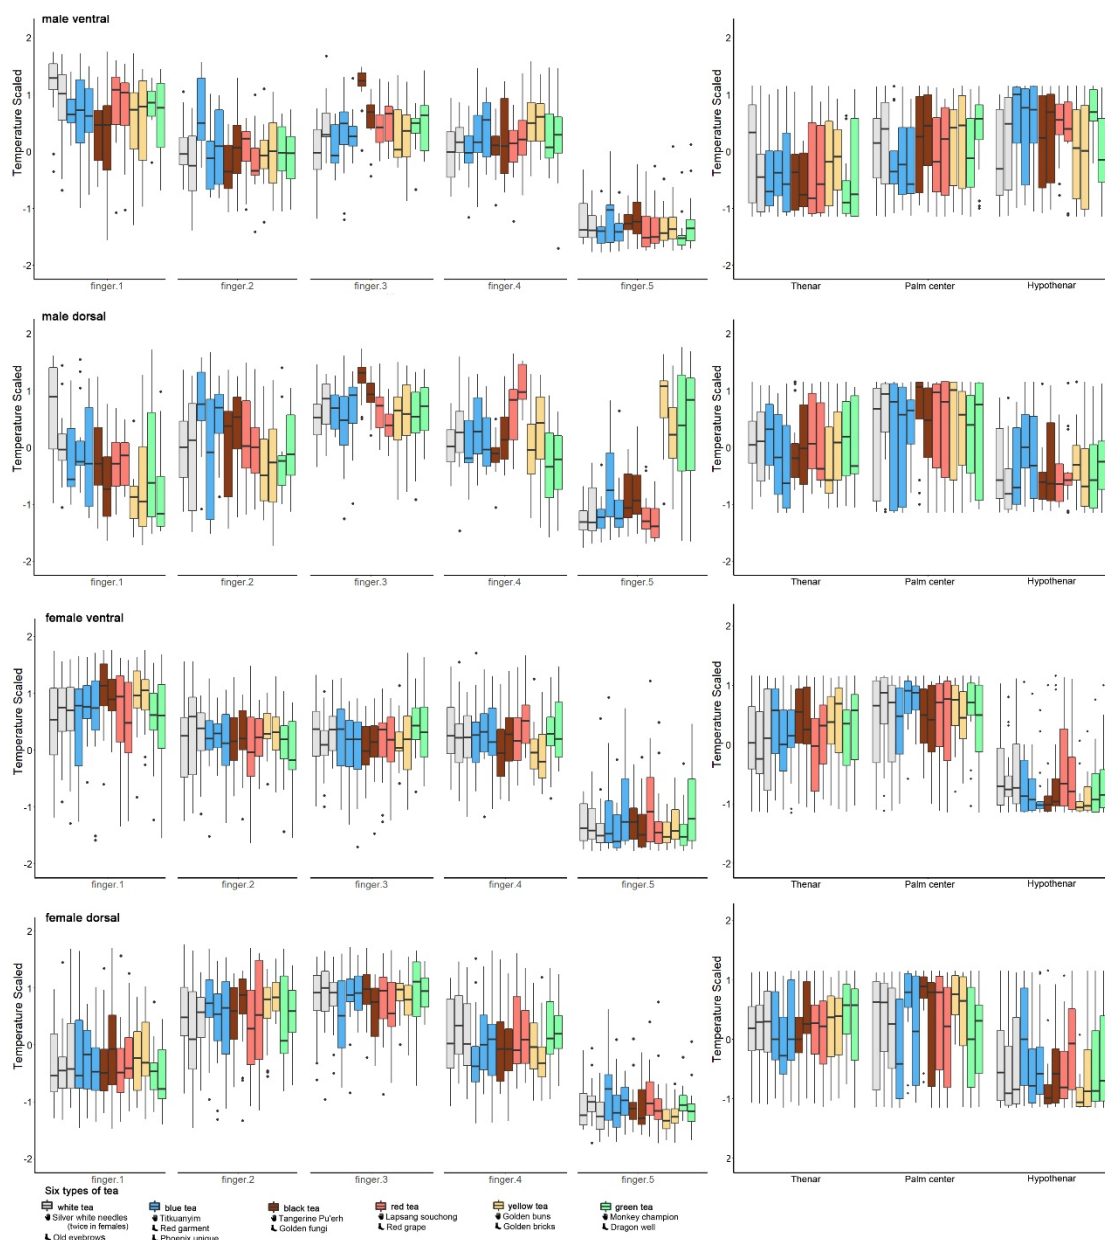

**Supplementary Fig. 2 Temperature distributions on both sides of the hands after drinking tea**

Among males, temperature distributions are obviously different after drinking different tea. Dorsal side showed more different especially after white, red, yellow, and green tea, but no significance was found between two sides.

## Infrared imageries of human body activated by tea match the hypothesis of meridian system

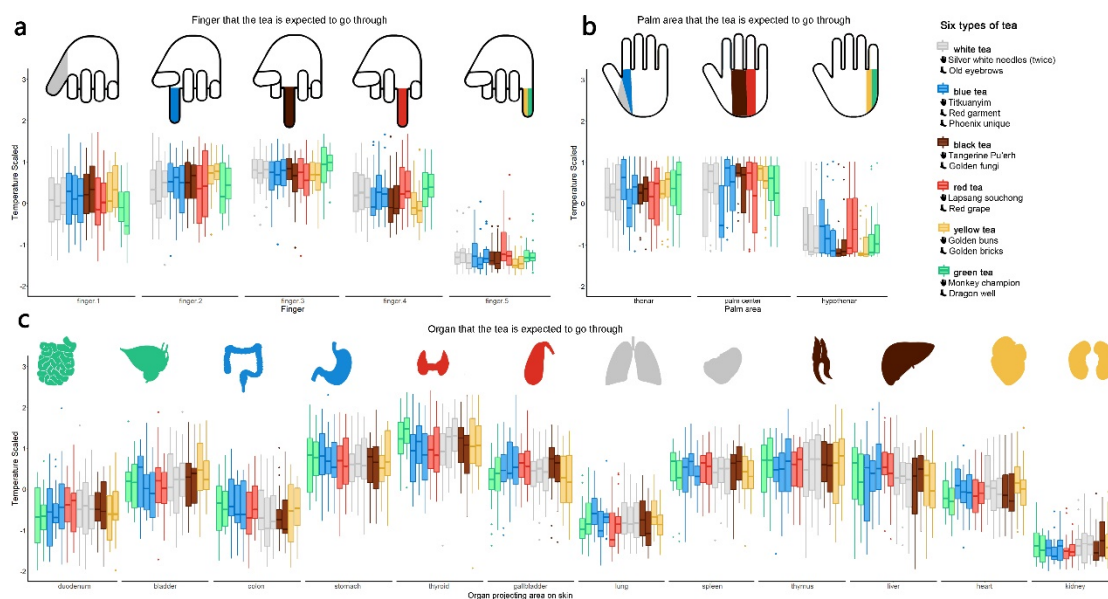

**Supplementary Fig. 3** The standardized temperatures derived from body surfaces of female volunteers after drinking different kinds of tea

(a) The fingers. Fingers 1~5 stand for thumb, index finger, middle finger, ring finger, little finger respectively. (b) The palm areas. (c) The skin above the organs. The bars with the same color were displayed in order of hand side tea to foot side tea from the left. Tea names were listed in the legend. Medians and 95% CI were marked on the bar. The figures above the bars indicated the areas activated by the tea distinguished with colors according to the meridian hypothesis.

## Infrared imageries of human body activated by tea match the hypothesis of meridian system

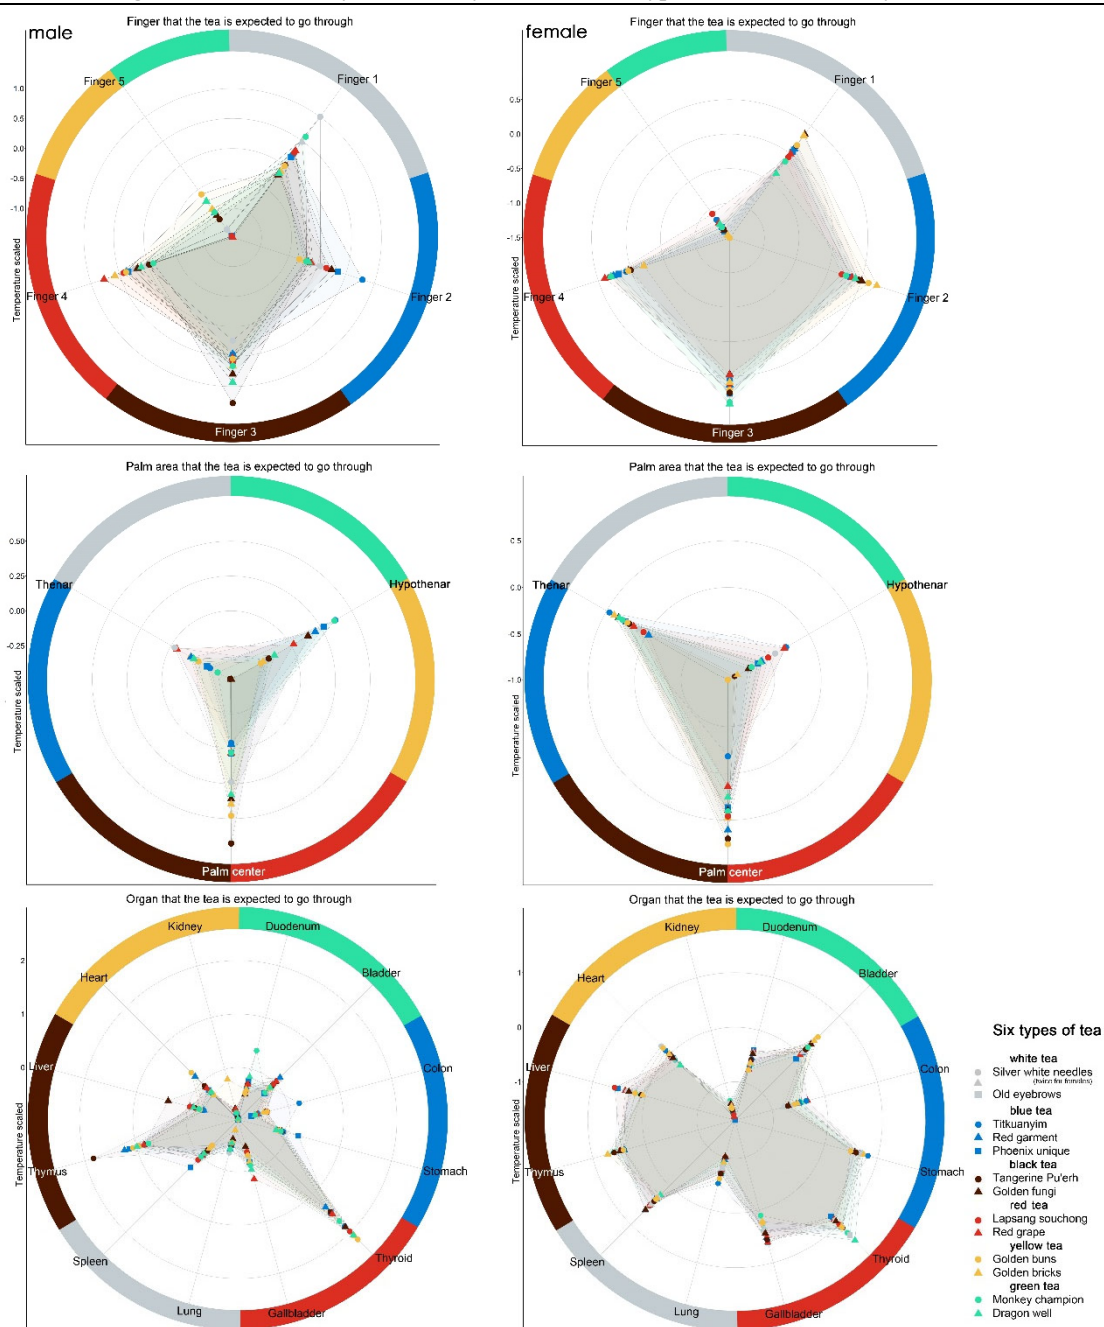

**Supplementary Fig. 4 The means of the temperature on body surfaces after drinking tea**

The colors stand for the tea types. The colors of the surrounding circles show the hypothesis of the correspondence between tea and meridians.

**Infrared imageries of human body activated by tea match the hypothesis of meridian system**

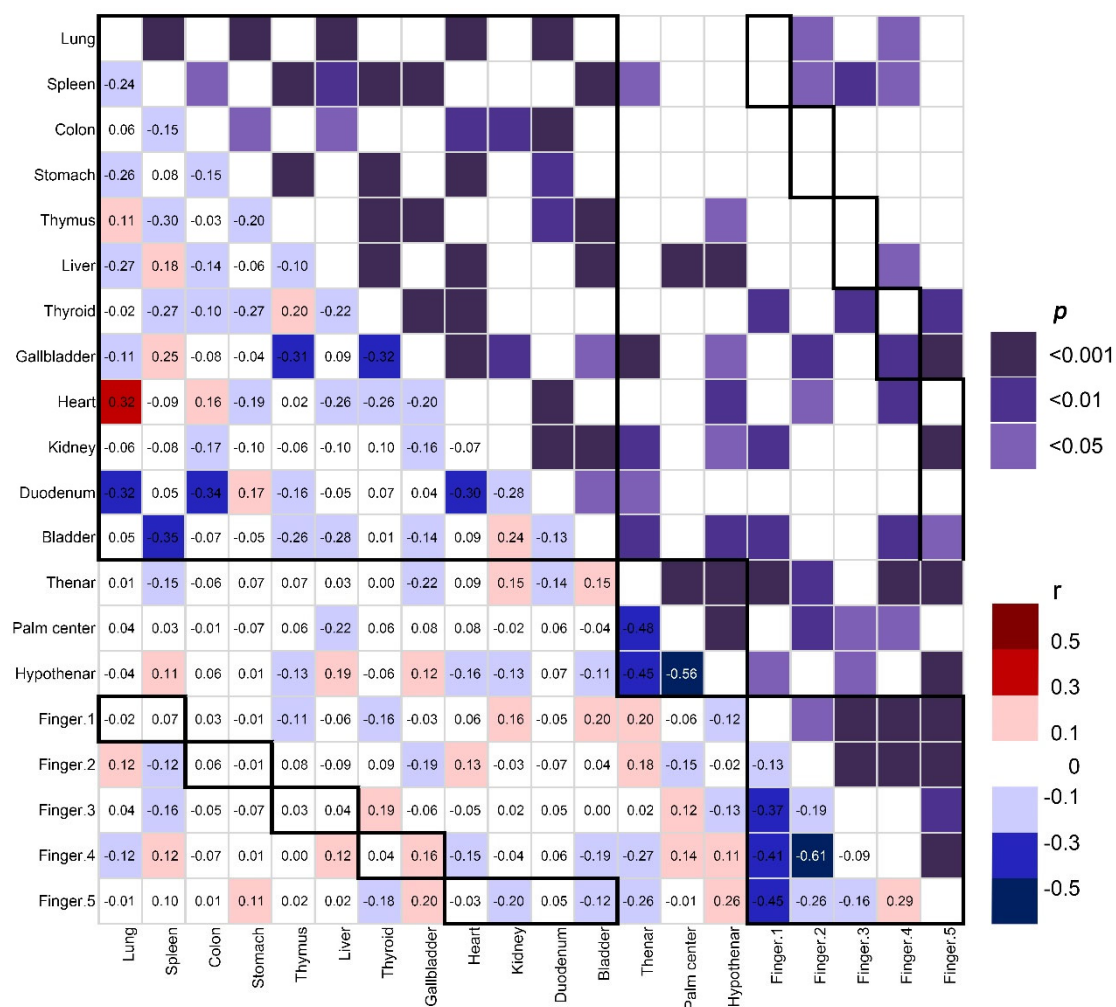

**Supplementary Fig. 5 Correlations among temperature data of body areas in female volunteers after drinking tea**

Significances were displayed in the right upper part. The bold boxes in the left lower part indicated the hypothetic correlations between fingers and organs. Bold boxes in the center indicated the correlations within the body parts.

**Supplementary Table 1 Taxonomy of the tea collected in this study and voucher specimens' deposition places**

|              |             |                                    | <b>Grand</b>                                                | <b>Middle</b>                                                                               | <b>Little</b>                                           |
|--------------|-------------|------------------------------------|-------------------------------------------------------------|---------------------------------------------------------------------------------------------|---------------------------------------------------------|
| <b>Lunar</b> | <b>Hand</b> | <b>Tea name</b>                    | Silver White Needles (BaihaoYinzhen)                        | Tangerine Pu'erh (ChenxiangShupu)                                                           | Golden Buns (Fan Jin Ji)                                |
|              |             | <b>Key procedure of production</b> | Drying→Sunbathing                                           | Frying→Kneading                                                                             | Frying→Wrapping                                         |
|              |             | <b>Key bioactive molecule type</b> | Aromatic esters (Isoeugenol acetate, etc)                   | Saponins (Grosvenorine, etc.)                                                               | Flavones (Vitexin, etc.)                                |
|              |             | <b>Specimen deposition place</b>   | Lvxueya Tea Co., Fuding, Fujian province                    | Yeguo Tea Co., Jingmaishan, Lancang, Yunnan province                                        | Bud-Chem Tea Co., Jiangkou, Guizhou province            |
|              | <b>Foot</b> | <b>Tea name</b>                    | Old Eyebrows (Shou Mei)                                     | Golden Fungi (Jimhua, Ruyi Grade)                                                           | Golden Bricks (Jim Ding)                                |
|              |             | <b>Key procedure of production</b> | Drying→Sunbathing                                           | Frying→Kneading                                                                             | Frying→Wrapping                                         |
|              |             | <b>Key bioactive molecule type</b> | Aromatic esters (Gallic acid ethyl ester, etc.)             | Saponins (Desoxyrhaponticin, etc.)                                                          | Flavones (Taxifolin, etc.)                              |
|              |             | <b>Specimen deposition place</b>   | Lvxueya Tea Co., Fuding, Fujian province                    | Ziranyun Black Tea Co., Yongzhou, Hunan province                                            | Jinding Tea Co., Zheng'an, Guizhou province             |
| <b>Solar</b> | <b>Hand</b> | <b>Tea name</b>                    | Monkey Champion (Hou Kui)                                   | Titkuanym                                                                                   | Lapsang Souchong (ZhengshanXiaozhong)                   |
|              |             | <b>Key procedure of production</b> | Frying (inactivation)                                       | Shaking→Frying                                                                              | Piling→Frying                                           |
|              |             | <b>Key bioactive molecule type</b> | Polyphenols (Matairesinol, etc.)                            | Aromatic acids (Ferulic acid, etc.)                                                         | Aromatic amines (N-Phenylacetamide, etc.)               |
|              |             | <b>Specimen deposition place</b>   | Xieyuda Tea Co., Huangshan, Anhui province                  | Xuantie Tea Co., Anxi, Fujian province                                                      | Zhengshantang Tea Co., Wuyishan, Fujian province        |
|              | <b>Food</b> | <b>Tea name</b>                    | Dragon Well (Long Jing)                                     | Red Garment (Dahongpao, Shengjiang Grade); Phoenix Unique (FenghuangDancong)                | Yunnan Red Grape (Pu Hong)                              |
|              |             | <b>Key procedure of production</b> | Frying (inactivation)                                       | Shaking→Frying                                                                              | Piling→Frying                                           |
|              |             | <b>Key bioactive molecule type</b> | Polyphenols (Corilagin, etc.)                               | Aromatic acids (Lithospermic acid, etc.)                                                    | Aromatic amines (Indole-3-acetyl-L-aspartic acid, etc.) |
|              |             | <b>Specimen deposition place</b>   | Hangzhou Xihu Longjing Tea Co., Hangzhou, Zhejiang province | Ruiquan Tea Co., Wuyishan, Fujian province; Gangbhudeng Tea Co., Swatow, Guangdong province | Chamasi Tea Co., Jinggu, Yunnan province                |

All the tea specimens have copies kept in School of Life Sciences, Fudan University.

**Supplementary Table 2 Maximum temperatures (°C) in the areas of the body surface of the volunteers after drinking different tea**

| Individual | Tea       | Meridian | V/R5 | V/R4 | V/R3 | V/R2 | V/R1 | V/L1 | V/L2 | V/L3 | V/L4 | V/L5 | D/R5 | D/R4 | D/R3 | D/R2 | D/R1 | D/L1 | D/L2 | D/L3 | D/L4 | D/L5 |
|------------|-----------|----------|------|------|------|------|------|------|------|------|------|------|------|------|------|------|------|------|------|------|------|------|
| M0         | Hot water | None     | 29.5 | 30.1 | 30.6 | 30.0 | 30.9 | 30.2 | 29.4 | 29.8 | 30.3 | 29.6 | 29.5 | 30.5 | 30.9 | 30.4 | 30.8 | 30.1 | 29.2 | 29.9 | 29.8 | 29.2 |
| M0         | T01       | Lung     | 29.8 | 30.5 | 30.4 | 30.4 | 30.6 | 30.1 | 30.3 | 30.4 | 30.4 | 29.7 | 29.2 | 30.0 | 30.2 | 29.8 | 31.9 | 30.7 | 29.3 | 29.2 | 28.7 | 28.8 |
| M0         | T02       | Spleen   | 31.1 | 32.2 | 33.7 | 33.8 | 32.2 | 31.7 | 32.7 | 32.7 | 31.5 | 30.5 | 31.9 | 32.7 | 32.4 | 32.5 | 32.5 | 32.5 | 32.5 | 32.4 | 31.8 | 32.1 |
| M0         | T03       | Colon    | 31.9 | 32.9 | 33.7 | 35.0 | 32.2 | 32.0 | 35.2 | 32.7 | 32.0 | 30.8 | 31.6 | 33.0 | 32.2 | 32.1 | 32.5 | 32.0 | 31.7 | 32.4 | 31.8 | 30.8 |
| M0         | T04a      | Stomach  | 29.9 | 31.0 | 30.9 | 31.8 | 30.4 | 30.0 | 32.3 | 29.7 | 29.6 | 29.1 | 30.3 | 32.4 | 32.8 | 32.6 | 32.6 | 31.4 | 31.7 | 31.5 | 31.3 | 29.6 |
| M0         | T04b      | Stomach  | 32.1 | 32.8 | 32.5 | 32.8 | 31.6 | 31.3 | 32.8 | 32.8 | 32.3 | 31.0 | 32.1 | 32.9 | 32.8 | 32.5 | 32.8 | 32.0 | 32.4 | 31.8 | 32.1 | 30.9 |
| M0         | T05       | Thymus   | 32.5 | 33.0 | 33.6 | 33.7 | 33.4 | 33.6 | 33.3 | 33.5 | 32.9 | 32.2 | 33.3 | 34.7 | 35.5 | 34.6 | 34.0 | 33.9 | 34.6 | 35.3 | 34.2 | 33.8 |
| M0         | T06       | Liver    | 33.1 | 33.1 | 33.3 | 33.2 | 32.9 | 32.2 | 34.6 | 33.9 | 33.6 | 33.0 | 32.5 | 33.3 | 33.3 | 33.2 | 33.3 | 32.5 | 32.7 | 32.9 | 32.8 | 32.3 |
| M0         | T07       | HPT      | 33.1 | 34.2 | 34.7 | 35.6 | 33.1 | 33.9 | 35.7 | 34.4 | 34.0 | 33.1 | 32.8 | 33.7 | 34.0 | 33.6 | 33.5 | 34.0 | 33.8 | 34.8 | 33.7 | 32.4 |
| M0         | T08       | Gall     | 33.1 | 33.3 | 33.1 | 33.4 | 32.6 | 32.9 | 33.5 | 32.8 | 33.1 | 32.2 | 32.8 | 33.2 | 33.3 | 33.3 | 33.3 | 32.9 | 32.8 | 32.5 | 32.6 | 31.8 |
| M0         | T09       | Heart    | 30.3 | 31.1 | 30.3 | 29.9 | 29.8 | 29.2 | 29.5 | 29.8 | 29.9 | 30.1 | 30.2 | 31.1 | 30.8 | 30.3 | 31.5 | 30.9 | 29.0 | 29.3 | 29.3 | 28.3 |
| M0         | T10       | Kidney   | 32.9 | 32.9 | 32.9 | 32.6 | 32.7 | 33.7 | 33.1 | 32.7 | 33.3 | 32.5 | 33.0 | 33.4 | 33.0 | 32.4 | 33.7 | 33.4 | 33.0 | 33.8 | 33.8 | 32.4 |
| M0         | T11       | Duodenum | 34.3 | 34.9 | 34.4 | 34.8 | 34.0 | 34.0 | 35.5 | 34.8 | 34.4 | 33.9 | 34.3 | 34.6 | 34.7 | 34.5 | 34.8 | 33.7 | 34.3 | 34.1 | 34.3 | 33.6 |
| M0         | T12       | Bladder  | 32.0 | 32.7 | 32.6 | 32.8 | 33.1 | 32.4 | 32.9 | 32.1 | 32.5 | 31.2 | 32.8 | 33.5 | 33.0 | 32.5 | 32.2 | 32.5 | 32.0 | 32.5 | 32.4 | 32.1 |
| M01        | Hot water | None     | 35.8 | 36.1 | 36.1 | 35.4 | 35.7 | 35.5 | 35.5 | 36.3 | 36.0 | 35.4 | 36.0 | 36.5 | 36.4 | 35.8 | 35.9 | 35.8 | 35.7 | 36.8 | 36.5 | 35.6 |
| M01        | T01       | Lung     | 35.7 | 35.7 | 35.8 | 35.7 | 36.1 | 36.0 | 35.6 | 36.1 | 36.0 | 35.7 | 35.2 | 35.2 | 35.1 | 35.2 | 35.5 | 35.5 | 35.3 | 35.1 | 35.3 | 35.1 |
| M01        | T02       | Spleen   | 35.3 | 35.4 | 35.6 | 35.5 | 36.0 | 36.6 | 35.4 | 37.8 | 36.9 | 35.8 | 34.7 | 35.1 | 34.9 | 35.0 | 35.3 | 35.7 | 34.8 | 35.5 | 35.4 | 34.7 |
| M01        | T03       | Colon    | 34.9 | 35.2 | 35.2 | 35.7 | 35.5 | 35.3 | 35.8 | 35.5 | 35.0 | 34.8 | 34.2 | 34.4 | 34.5 | 34.9 | 34.8 | 35.0 | 34.3 | 34.8 | 34.9 | 34.3 |
| M01        | T04a      | Stomach  | 34.3 | 34.9 | 35.6 | 35.4 | 35.4 | 34.8 | 34.7 | 35.4 | 35.3 | 34.5 | 34.2 | 35.0 | 35.5 | 35.3 | 35.4 | 34.9 | 35.4 | 35.5 | 35.3 | 34.7 |
| M01        | T04b      | Stomach  | 35.7 | 36.1 | 36.0 | 36.5 | 36.4 | 36.5 | 36.6 | 36.5 | 36.4 | 36.3 | 35.3 | 35.4 | 35.7 | 35.8 | 35.8 | 35.5 | 35.6 | 35.7 | 35.5 | 35.1 |
| M01        | T05       | Thymus   | 34.9 | 34.9 | 36.1 | 34.8 | 34.5 | 35.6 | 35.6 | 37.1 | 35.6 | 34.7 | 33.9 | 34.6 | 34.9 | 34.5 | 34.3 | 35.1 | 34.1 | 35.3 | 34.4 | 33.4 |
| M01        | T06       | Liver    | 34.9 | 35.2 | 35.2 | 35.2 | 35.2 | 35.5 | 35.9 | 36.5 | 35.5 | 34.9 | 34.7 | 34.6 | 34.8 | 34.7 | 34.8 | 35.4 | 35.2 | 35.5 | 35.0 | 34.7 |
| M01        | T07       | HPT      | 34.4 | 35.5 | 35.2 | 34.7 | 35.1 | 34.7 | 34.6 | 34.5 | 34.6 | 34.0 | 33.7 | 34.3 | 34.0 | 34.2 | 34.4 | 34.6 | 34.4 | 34.1 | 33.9 | 33.5 |
| M01        | T08       | Gall     | 35.3 | 36.1 | 35.8 | 35.9 | 35.9 | 35.8 | 35.8 | 36.0 | 36.1 | 35.8 | 35.1 | 35.5 | 35.4 | 35.3 | 35.1 | 35.2 | 35.0 | 35.3 | 35.1 | 35.0 |
| M01        | T09       | Heart    | 35.7 | 34.7 | 35.0 | 35.0 | 35.0 | 35.3 | 35.1 | 36.2 | 35.5 | 35.9 | 34.0 | 34.2 | 34.4 | 34.6 | 34.4 | 34.8 | 34.2 | 34.7 | 35.1 | 34.2 |
| M01        | T10       | Kidney   | 35.1 | 34.9 | 35.2 | 35.0 | 34.9 | 34.4 | 34.5 | 34.4 | 34.4 | 34.4 | 34.0 | 34.4 | 34.4 | 34.5 | 34.4 | 34.0 | 34.3 | 34.5 | 34.5 | 34.3 |
| M01        | T11       | Duodenum | 36.0 | 35.1 | 35.2 | 35.3 | 35.6 | 35.3 | 34.8 | 35.2 | 34.9 | 35.3 | 34.1 | 34.6 | 34.7 | 35.0 | 34.9 | 34.9 | 34.8 | 34.9 | 34.9 | 34.4 |
| M01        | T12       | Bladder  | 35.6 | 35.7 | 35.9 | 36.0 | 35.9 | 35.7 | 35.8 | 35.9 | 35.9 | 35.9 | 35.3 | 35.1 | 35.2 | 35.2 | 35.2 | 35.2 | 35.3 | 35.3 | 35.0 | 35.1 |
| M03        | Hot water | None     | 32.5 | 33.6 | 32.8 | 33.1 | 32.7 | 32.7 | 33.7 | 33.2 | 32.7 | 33.2 | 32.9 | 32.8 | 33.2 | 34.0 | 33.1 | 33.8 | 33.2 | 33.0 | 33.3 | 33.7 |
| M03        | T01       | Lung     | 33.5 | 34.2 | 33.9 | 34.5 | 33.6 | 33.7 | 33.7 | 33.9 | 33.6 | 33.8 | 32.2 | 34.0 | 34.1 | 33.9 | 33.5 | 33.4 | 33.9 | 34.0 | 34.2 | 33.3 |
| M03        | T02       | Spleen   | 31.8 | 32.8 | 32.8 | 32.5 | 32.6 | 32.7 | 33.2 | 33.1 | 33.0 | 32.5 | 32.4 | 33.4 | 33.7 | 33.3 | 33.2 | 32.8 | 33.3 | 33.3 | 33.4 | 32.9 |
| M03        | T03       | Colon    | 34.0 | 35.0 | 35.2 | 35.5 | 34.4 | 34.0 | 35.5 | 34.6 | 34.4 | 34.5 | 33.6 | 33.9 | 33.8 | 34.4 | 34.2 | 33.9 | 34.9 | 33.8 | 34.1 | 33.5 |
| M03        | T04a      | Stomach  | 36.0 | 37.6 | 38.1 | 36.2 | 36.8 | 35.9 | 35.8 | 36.0 | 36.2 | 36.0 | 34.7 | 36.2 | 35.7 | 34.9 | 36.1 | 35.0 | 35.6 | 36.0 | 36.1 | 35.6 |
| M03        | T04b      | Stomach  | 36.5 | 36.6 | 36.8 | 36.4 | 36.3 | 36.3 | 36.4 | 36.6 | 36.8 | 36.3 | 34.9 | 35.7 | 35.6 | 35.2 | 36.0 | 35.8 | 35.6 | 35.8 | 36.0 | 35.4 |
| M03        | T05       | Thymus   | 34.5 | 36.3 | 36.9 | 35.8 | 34.3 | 34.7 | 35.7 | 36.2 | 35.1 | 34.5 | 33.8 | 34.5 | 35.4 | 34.7 | 34.4 | 34.7 | 34.4 | 34.1 | 33.9 | 34.2 |
| M03        | T06       | Liver    | 35.3 | 35.5 | 35.8 | 35.3 | 34.9 | 34.7 | 35.1 | 35.2 | 35.3 | 35.4 | 34.7 | 34.9 | 35.0 | 34.7 | 34.7 | 34.6 | 35.0 | 35.0 | 35.3 | 35.0 |
| M03        | T07       | HPT      | 34.7 | 35.1 | 34.8 | 34.7 | 34.5 | 34.5 | 34.4 | 34.7 | 35.1 | 34.5 | 33.5 | 34.0 | 34.3 | 33.8 | 33.9 | 34.2 | 34.4 | 34.6 | 34.3 | 33.9 |
| M03        | T08       | Gall     | 35.4 | 36.2 | 36.0 | 35.8 | 35.7 | 35.8 | 35.6 | 35.6 | 35.8 | 35.6 | 34.8 | 35.1 | 35.2 | 34.9 | 35.2 | 35.2 | 35.4 | 35.3 | 35.4 | 35.0 |
| M03        | T09       | Heart    | 32.4 | 32.7 | 33.1 | 31.9 | 31.2 | 31.2 | 32.1 | 32.5 | 32.7 | 32.4 | 31.3 | 32.0 | 32.3 | 31.8 | 31.8 | 31.7 | 32.0 | 32.5 | 32.7 | 31.2 |
| M03        | T10       | Kidney   | 32.2 | 33.1 | 33.0 | 32.8 | 31.9 | 31.2 | 33.2 | 33.7 | 32.5 | 32.0 | 31.7 | 32.8 | 32.8 | 32.2 | 32.4 | 31.8 | 32.8 | 33.1 | 33.1 | 32.1 |
| M03        | T11       | Duodenum | 34.6 | 34.9 | 35.0 | 34.0 | 34.1 | 33.9 | 34.1 | 34.3 | 34.2 | 34.9 | 34.1 | 34.9 | 34.8 | 34.1 | 34.5 | 35.1 | 34.6 | 34.7 | 35.0 | 34.6 |
| M03        | T12       | Bladder  | 35.3 | 34.2 | 34.8 | 34.7 | 33.9 | 34.2 | 34.1 | 34.4 | 34.4 | 34.6 | 33.6 | 34.3 | 34.6 | 34.0 | 34.4 | 34.5 | 34.4 | 34.3 | 34.6 | 33.6 |
| M05        | Hot water | None     | 33.8 | 35.0 | 34.5 | 34.3 | 34.9 | 34.2 | 34.2 | 34.7 | 34.4 | 34.6 | 33.8 | 33.8 | 34.6 | 34.2 | 35.2 | 34.9 | 34.8 | 34.2 | 34.9 | 34.5 |
| M05        | T01       | Lung     | 34.5 | 34.4 | 34.5 | 34.2 | 34.8 | 34.9 | 34.2 | 34.4 | 34.3 | 33.8 | 34.0 | 34.6 | 34.6 | 34.2 | 34.7 | 34.6 | 34.2 | 34.6 | 34.4 | 34.0 |
| M05        | T02       | Spleen   | 34.3 | 35.0 | 35.1 | 33.6 | 34.4 | 33.6 | 33.5 | 33.8 | 33.4 | 33.1 | 33.6 | 34.3 | 34.2 | 33.5 | 34.4 | 33.9 | 33.5 | 34.1 | 33.8 | 32.9 |
| M05        | T03       | Colon    | 34.5 | 35.0 | 34.9 | 35.0 | 34.4 | 34.7 | 35.8 | 36.7 | 35.8 | 34.5 | 33.9 | 34.2 | 34.6 | 34.9 | 34.3 | 35.5 | 35.2 | 34.7 | 34.9 | 33.8 |
| M05        | T04a      | Stomach  | 37.5 | 38.0 | 37.5 | 36.1 | 37.3 | 36.3 | 36.6 | 36.7 | 36.7 | 36.5 | 36.1 | 36.3 | 36.2 | 35.9 | 37.4 | 36.2 | 36.3 | 36.2 | 36.3 | 36.2 |
| M05        | T04b      | Stomach  | 36.6 | 37.6 | 37.2 | 36.8 | 36.6 | 36.2 | 36.8 | 36.9 | 36.5 | 36.1 | 35.5 | 35.9 | 35.8 | 35.7 | 36.3 | 36.1 | 35.7 | 35.7 | 35.6 | 34.8 |
| M05        | T05       | Thymus   | 35.2 | 35.4 | 35.7 | 34.9 | 35.4 | 35.1 | 35.0 | 35.5 | 35.0 | 35.1 | 35.0 | 35.3 | 35.5 | 34.7 | 35.1 | 34.8 | 35.1 | 35.5 | 35.2 | 34.7 |
| M05        | T07       | HPT      | 34.6 | 35.5 | 36.2 | 34.6 | 35.3 | 34.4 | 35.8 | 35.9 | 36.1 | 34.3 | 33.8 | 34.4 | 34.6 | 34.2 | 34.4 | 35.1 | 34.5 | 34.7 | 34.6 | 33.4 |
| M05        | T08       | Gall     | 35.0 | 36.0 | 35.4 | 35.2 | 35.5 | 35.2 | 35.1 | 35.3 | 35.4 | 35.0 | 34.9 | 35.2 | 35.2 | 35.0 | 35.1 | 35.2 | 34.9 | 35.2 | 35.1 | 34.5 |
| M05        | T09       | Heart    | 35.3 | 35.0 | 34.9 | 34.4 | 34.6 | 34.5 | 34.6 | 35.0 | 34.6 | 34.8 | 34.5 | 34.8 | 34.9 | 34.6 | 34.4 | 34.3 | 34.7 | 35.1 | 34.8 | 34.6 |
| M05        | T10       | Kidney   | 34.6 | 34.5 | 34.3 | 34.1 | 34.2 | 33.9 | 34.0 | 34.2 | 34.0 | 34.3 | 33.8 | 34.3 | 34.4 | 34.1 | 34.0 | 34.0 | 34.3 | 34.6 | 34.3 | 33.7 |
| M05        | T11       | Duodenum | 35.3 | 34.9 | 35.2 | 34.7 | 34.7 | 34.4 | 34.4 | 34.5 | 34.4 | 34.7 | 34.2 | 35.1 | 34.8 | 34.5 | 35.2 | 34.7 | 34.6 | 34.8 | 34.7 | 34.2 |
| M05        | T12       | Bladder  | 34.9 | 34.9 | 34.8 | 34.3 | 34.4 | 34.4 | 35.0 | 35.1 | 34.6 | 35.1 | 33.9 | 34.3 | 34.4 | 34.1 | 34.2 | 34.4 | 34.3 | 34.8 | 34.6 | 34.2 |
| M07        | Hot water | None     | 35.1 | 34.1 | 34.1 | 33.9 | 35.0 | 34.9 | 34.0 | 34.2 | 34.2 | 34.3 | 34.0 | 34.2 | 33.8 | 33.7 | 34.8 | 34.4 | 34.3 | 34.3 | 34.8 | 34.3 |
| M07        | T01       | Lung     | 33.6 | 34.4 | 34.4 | 34.4 | 34.6 | 35.0 | 35.2 | 36.3 | 35.2 | 35.0 | 34.4 | 34.5 | 34.2 | 34.6 | 35.3 | 34.9 | 34.7 | 34.9 | 34.6 | 34.6 |
| M07        | T02       | Spleen   | 36.0 | 35.9 | 36.1 | 36.2 | 36.5 | 36.1 | 36.5 | 36.7 | 36.1 | 36.3 | 35.6 | 35.9 | 35.8 | 36.0 | 36.3 | 36.3 | 35.7 | 36.1 | 35.8 | 35.1 |
| M07        | T03       | Colon    | 34.0 | 34.3 | 34.7 | 34.7 | 34.3 | 34.9 | 34.7 | 34.8 | 34.0 |      |      |      |      |      |      |      |      |      |      |      |

**Infrared imageries of human body activated by tea match the hypothesis of meridian system**

**(Supplementary Table 2 Continued)**

| Individual | Tea       | Meridian | VR5  | VR4  | VR3  | VR2  | VR1  | VL1  | VL2  | VL3  | VL4  | VL5  | DR5  | DR4  | DR3  | DR2  | DR1  | DL1  | DL2  | DL3  | DL4  | DL5  |      |
|------------|-----------|----------|------|------|------|------|------|------|------|------|------|------|------|------|------|------|------|------|------|------|------|------|------|
| M11        | Hot water | None     | 32.8 | 33.8 | 32.9 | 33.6 | 33.8 | 33.0 | 33.3 | 33.5 | 33.3 | 33.4 | 33.0 | 33.8 | 33.3 | 33.3 | 34.2 | 34.2 | 33.0 | 33.5 | 33.8 | 33.7 | 33.4 |
| M11        | T01       | Lung     | 33.5 | 34.1 | 34.4 | 34.3 | 34.4 | 33.6 | 35.5 | 35.1 | 34.2 | 33.7 | 33.4 | 33.3 | 33.4 | 33.5 | 33.7 | 33.4 | 34.5 | 34.1 | 34.0 | 32.4 | 32.4 |
| M11        | T02       | Spleen   | 34.2 | 34.5 | 34.5 | 34.8 | 34.4 | 33.7 | 36.8 | 37.2 | 36.0 | 33.9 | 34.0 | 34.2 | 34.3 | 34.2 | 34.5 | 34.3 | 34.2 | 34.8 | 34.4 | 33.7 | 33.7 |
| M11        | T05       | Thymus   | 34.6 | 34.8 | 35.2 | 34.9 | 34.6 | 34.7 | 36.1 | 36.2 | 35.1 | 34.4 | 34.1 | 34.8 | 35.5 | 34.7 | 34.4 | 34.4 | 35.1 | 35.5 | 34.6 | 33.6 | 33.6 |
| M11        | T06       | Liver    | 36.0 | 36.8 | 36.7 | 36.3 | 35.6 | 35.9 | 37.7 | 37.3 | 36.3 | 36.0 | 35.9 | 36.1 | 35.8 | 36.0 | 35.8 | 35.5 | 36.3 | 36.2 | 35.3 | 34.8 | 34.8 |
| M11        | T07       | HPT      | 34.9 | 35.5 | 36.0 | 36.2 | 35.5 | 35.2 | 38.6 | 38.2 | 36.9 | 35.3 | 34.6 | 34.8 | 34.9 | 34.6 | 34.7 | 34.7 | 35.2 | 35.0 | 35.0 | 34.8 | 34.8 |
| M11        | T09       | Heart    | 34.9 | 36.9 | 37.8 | 37.0 | 35.9 | 34.6 | 35.8 | 35.0 | 33.9 | 35.2 | 33.1 | 34.4 | 34.0 | 34.0 | 34.5 | 34.7 | 34.7 | 34.3 | 34.0 | 33.3 | 33.3 |
| M11        | T10       | Kidney   | 35.1 | 36.2 | 36.0 | 34.4 | 34.9 | 33.7 | 34.0 | 33.8 | 34.0 | 34.0 | 33.8 | 34.4 | 34.3 | 34.0 | 34.6 | 33.6 | 33.9 | 33.9 | 33.3 | 33.3 | 33.3 |
| M11        | T12       | Bladder  | 35.9 | 35.3 | 35.4 | 35.5 | 35.3 | 35.3 | 35.4 | 35.7 | 35.4 | 35.4 | 34.5 | 34.5 | 34.9 | 34.5 | 34.5 | 34.4 | 34.8 | 34.9 | 34.7 | 34.1 | 34.1 |
| M13        | Hot water | None     | 31.1 | 32.0 | 31.9 | 32.3 | 31.8 | 32.3 | 31.3 | 31.8 | 31.0 | 31.5 | 31.5 | 32.2 | 32.1 | 32.8 | 32.0 | 32.7 | 31.9 | 32.2 | 31.3 | 32.0 | 32.0 |
| M13        | T01       | Lung     | 32.2 | 33.5 | 33.4 | 33.0 | 33.6 | 33.2 | 32.7 | 33.3 | 33.2 | 32.4 | 31.0 | 33.1 | 32.3 | 32.4 | 32.8 | 33.1 | 32.3 | 32.8 | 33.0 | 32.1 | 32.1 |
| M13        | T02       | Spleen   | 33.9 | 34.7 | 35.4 | 36.4 | 34.7 | 34.6 | 34.5 | 34.6 | 34.8 | 34.0 | 33.5 | 34.2 | 35.1 | 34.9 | 34.5 | 34.2 | 34.1 | 33.5 | 34.1 | 32.8 | 32.8 |
| M13        | T03       | Colon    | 34.0 | 34.9 | 35.2 | 34.1 | 34.1 | 33.4 | 33.9 | 33.5 | 33.5 | 33.1 | 32.0 | 34.0 | 33.6 | 33.5 | 33.7 | 33.4 | 33.1 | 32.2 | 32.8 | 32.6 | 32.6 |
| M13        | T04a      | Stomach  | 33.7 | 34.2 | 35.6 | 36.3 | 34.6 | 34.7 | 36.6 | 34.3 | 34.9 | 33.7 | 33.0 | 33.7 | 33.3 | 34.1 | 33.9 | 34.4 | 33.4 | 33.3 | 34.2 | 33.9 | 33.9 |
| M13        | T04b      | Stomach  | 35.2 | 35.7 | 35.5 | 35.4 | 35.2 | 35.4 | 36.4 | 36.4 | 35.4 | 35.3 | 34.3 | 34.8 | 34.9 | 34.5 | 34.9 | 35.0 | 34.6 | 34.9 | 35.5 | 34.3 | 34.3 |
| M13        | T05       | Thymus   | 33.6 | 34.3 | 34.9 | 35.4 | 33.9 | 34.5 | 36.2 | 35.2 | 34.8 | 33.4 | 32.2 | 33.4 | 33.2 | 33.5 | 33.6 | 33.9 | 34.0 | 33.6 | 34.5 | 32.0 | 32.0 |
| M13        | T07       | HPT      | 32.3 | 34.2 | 34.3 | 33.1 | 33.9 | 32.7 | 32.3 | 33.1 | 33.3 | 32.5 | 31.0 | 33.0 | 32.6 | 32.6 | 32.9 | 32.4 | 31.9 | 32.8 | 32.8 | 31.3 | 31.3 |
| M13        | T08       | Gall     | 34.2 | 35.4 | 35.1 | 36.0 | 35.4 | 34.2 | 34.4 | 34.8 | 35.3 | 33.9 | 33.5 | 34.5 | 34.3 | 34.1 | 34.6 | 34.1 | 33.3 | 33.3 | 33.5 | 33.3 | 33.3 |
| M13        | T09       | Heart    | 33.5 | 33.5 | 33.7 | 33.8 | 33.3 | 33.2 | 33.3 | 33.4 | 33.4 | 33.8 | 32.9 | 33.5 | 33.0 | 33.4 | 33.5 | 33.4 | 33.0 | 33.1 | 33.4 | 32.3 | 32.3 |
| M13        | T10       | Kidney   | 33.9 | 33.7 | 34.3 | 34.1 | 33.5 | 33.0 | 33.1 | 33.7 | 33.6 | 33.5 | 32.7 | 33.4 | 33.4 | 33.3 | 33.0 | 33.5 | 32.3 | 33.3 | 33.8 | 32.1 | 32.1 |
| M13        | T11       | Duodenum | 33.0 | 33.8 | 33.6 | 33.2 | 33.7 | 33.3 | 33.4 | 33.3 | 33.4 | 32.8 | 31.5 | 32.9 | 33.2 | 33.0 | 33.4 | 32.9 | 32.2 | 32.9 | 33.0 | 31.7 | 31.7 |
| M13        | T12       | Bladder  | 33.9 | 33.2 | 33.6 | 33.0 | 32.8 | 33.9 | 36.5 | 37.1 | 34.7 | 34.1 | 31.4 | 32.4 | 31.9 | 32.0 | 32.5 | 32.9 | 32.5 | 33.2 | 34.5 | 32.1 | 32.1 |
| M15        | Hot water | None     | 34.2 | 35.4 | 35.4 | 35.1 | 34.5 | 35.6 | 35.4 | 34.3 | 35.4 | 34.7 | 34.2 | 35.7 | 35.4 | 35.4 | 35.8 | 36.0 | 34.9 | 35.4 | 34.8 | 34.8 | 34.8 |
| M15        | T01       | Lung     | 34.9 | 35.2 | 35.2 | 35.2 | 35.1 | 35.1 | 35.0 | 35.2 | 35.0 | 34.5 | 34.5 | 34.8 | 35.0 | 35.0 | 34.9 | 35.4 | 34.9 | 34.9 | 34.7 | 34.5 | 34.5 |
| M15        | T02       | Spleen   | 35.5 | 35.8 | 35.8 | 35.5 | 35.5 | 35.0 | 35.4 | 35.1 | 34.8 | 34.0 | 34.5 | 34.9 | 35.1 | 35.0 | 35.4 | 35.5 | 34.9 | 34.9 | 34.6 | 34.1 | 34.1 |
| M15        | T03       | Colon    | 36.0 | 36.2 | 36.2 | 36.1 | 36.3 | 36.2 | 36.4 | 36.2 | 36.5 | 35.8 | 35.0 | 35.6 | 35.6 | 35.6 | 35.6 | 35.6 | 35.0 | 35.3 | 34.9 | 35.9 | 35.9 |
| M15        | T04a      | Stomach  | 36.3 | 36.4 | 36.7 | 36.8 | 36.6 | 36.5 | 37.1 | 37.2 | 36.3 | 36.0 | 36.3 | 36.7 | 37.0 | 36.7 | 36.8 | 37.0 | 36.3 | 36.9 | 36.4 | 35.8 | 35.8 |
| M15        | T04b      | Stomach  | 36.5 | 36.6 | 36.6 | 37.0 | 36.8 | 36.8 | 36.5 | 36.2 | 36.4 | 36.4 | 36.1 | 36.5 | 36.8 | 36.7 | 36.3 | 36.6 | 36.6 | 36.3 | 36.2 | 35.2 | 35.2 |
| M15        | T05       | Thymus   | 36.1 | 36.4 | 36.9 | 36.8 | 36.3 | 36.4 | 36.9 | 37.4 | 36.6 | 36.2 | 35.7 | 35.9 | 36.3 | 35.9 | 35.9 | 35.8 | 35.9 | 36.2 | 36.0 | 35.3 | 35.3 |
| M15        | T06       | Liver    | 35.4 | 35.7 | 36.0 | 36.0 | 35.6 | 35.9 | 36.1 | 35.9 | 35.7 | 35.7 | 35.4 | 35.6 | 35.8 | 35.8 | 35.9 | 35.7 | 35.3 | 35.4 | 35.0 | 34.7 | 34.7 |
| M15        | T07       | HPT      | 35.9 | 36.2 | 36.1 | 36.0 | 35.4 | 35.3 | 35.6 | 35.5 | 35.5 | 34.9 | 34.8 | 35.3 | 35.3 | 35.4 | 35.7 | 35.0 | 34.7 | 34.7 | 34.6 | 33.8 | 33.8 |
| M15        | T08       | Gall     | 36.1 | 36.6 | 36.7 | 36.6 | 36.0 | 36.2 | 36.4 | 36.2 | 36.5 | 35.9 | 35.4 | 35.6 | 35.6 | 35.6 | 35.6 | 35.6 | 34.9 | 35.4 | 35.1 | 34.4 | 34.4 |
| M15        | T09       | Heart    | 35.5 | 35.3 | 35.0 | 35.4 | 34.5 | 35.0 | 35.1 | 34.8 | 34.6 | 35.0 | 34.5 | 34.9 | 35.2 | 34.9 | 34.8 | 35.1 | 34.3 | 34.3 | 33.9 | 33.6 | 33.6 |
| M15        | T10       | Kidney   | 36.0 | 35.4 | 35.6 | 35.8 | 35.5 | 35.2 | 35.3 | 34.9 | 35.0 | 35.0 | 34.3 | 35.3 | 35.5 | 35.5 | 35.5 | 35.4 | 35.2 | 35.1 | 35.0 | 34.7 | 34.7 |
| M15        | T11       | Duodenum | 35.2 | 35.2 | 35.2 | 35.2 | 35.4 | 35.1 | 35.0 | 34.9 | 35.0 | 35.0 | 34.4 | 34.7 | 35.0 | 35.1 | 35.0 | 35.0 | 34.4 | 34.4 | 34.4 | 34.1 | 34.1 |
| M15        | T12       | Bladder  | 35.2 | 35.0 | 35.3 | 35.5 | 35.7 | 35.2 | 35.3 | 35.4 | 35.1 | 35.2 | 34.5 | 34.9 | 35.0 | 34.7 | 34.9 | 35.4 | 35.0 | 35.1 | 34.5 | 33.8 | 33.8 |
| M17        | Hot water | None     | 34.9 | 35.2 | 34.5 | 34.3 | 35.3 | 33.9 | 34.8 | 33.9 | 35.2 | 34.4 | 34.9 | 35.7 | 34.9 | 34.8 | 35.3 | 34.4 | 35.3 | 34.4 | 35.5 | 34.7 | 34.7 |
| M17        | T01       | Lung     | 34.2 | 34.4 | 34.7 | 34.7 | 35.2 | 35.0 | 34.4 | 34.7 | 34.5 | 34.1 | 34.1 | 34.3 | 34.4 | 34.4 | 35.2 | 35.0 | 34.4 | 34.7 | 34.7 | 33.8 | 33.8 |
| M17        | T02       | Spleen   | 34.4 | 34.9 | 34.9 | 34.7 | 34.6 | 34.6 | 34.8 | 34.9 | 34.8 | 34.6 | 32.9 | 33.4 | 33.9 | 33.9 | 34.1 | 34.8 | 34.1 | 34.1 | 34.2 | 33.6 | 33.6 |
| M17        | T03       | Colon    | 34.4 | 35.3 | 35.6 | 35.5 | 35.9 | 35.9 | 34.9 | 35.7 | 35.0 | 34.7 | 34.9 | 34.1 | 35.1 | 34.8 | 35.6 | 35.3 | 34.9 | 35.0 | 34.6 | 34.2 | 34.2 |
| M17        | T04a      | Stomach  | 35.8 | 36.1 | 36.2 | 36.2 | 36.4 | 36.4 | 35.8 | 36.2 | 36.0 | 35.0 | 34.7 | 34.5 | 35.5 | 35.2 | 35.5 | 36.1 | 35.5 | 35.7 | 35.5 | 35.3 | 35.3 |
| M17        | T04b      | Stomach  | 35.2 | 35.6 | 35.9 | 35.9 | 35.9 | 35.8 | 35.6 | 36.0 | 35.2 | 34.8 | 33.6 | 34.9 | 34.4 | 34.3 | 34.8 | 35.3 | 34.4 | 35.2 | 34.7 | 34.8 | 34.8 |
| M17        | T05       | Thymus   | 35.1 | 35.0 | 35.4 | 34.9 | 35.1 | 35.3 | 34.9 | 35.5 | 35.1 | 35.1 | 34.4 | 34.2 | 34.4 | 34.3 | 34.7 | 34.9 | 34.5 | 35.0 | 34.9 | 34.5 | 34.5 |
| M17        | T06       | Liver    | 35.7 | 35.9 | 36.3 | 36.1 | 35.8 | 35.4 | 36.0 | 36.3 | 35.8 | 35.8 | 35.5 | 35.8 | 36.0 | 35.8 | 35.8 | 35.8 | 35.6 | 35.8 | 35.7 | 35.3 | 35.3 |
| M17        | T07       | HPT      | 32.5 | 33.9 | 34.3 | 33.9 | 34.4 | 32.9 | 33.8 | 34.0 | 33.9 | 33.5 | 32.4 | 32.8 | 33.0 | 33.3 | 33.6 | 33.8 | 33.2 | 33.1 | 32.8 | 32.1 | 32.1 |
| M17        | T08       | Gall     | 33.5 | 35.0 | 35.1 | 34.5 | 34.8 | 34.8 | 34.1 | 34.7 | 35.0 | 33.6 | 33.5 | 33.5 | 33.8 | 33.9 | 34.1 | 34.5 | 34.1 | 34.4 | 34.3 | 33.6 | 33.6 |
| M17        | T09       | Heart    | 34.8 | 34.4 | 34.5 | 35.2 | 34.5 | 34.8 | 34.1 | 34.2 | 34.2 | 34.8 | 33.9 | 34.4 | 34.5 | 34.4 | 34.8 | 34.5 | 33.7 | 33.7 | 34.1 | 33.3 | 33.3 |
| M17        | T10       | Kidney   | 33.9 | 33.8 | 33.7 | 33.7 | 33.2 | 32.6 | 33.5 | 33.8 | 33.8 | 33.9 | 32.0 | 33.3 | 33.6 | 33.5 | 33.3 | 33.3 | 33.5 | 33.3 | 33.3 | 32.9 | 32.9 |
| M17        | T11       | Duodenum | 36.2 | 36.3 | 36.4 | 36.2 | 36.3 | 36.3 | 36.3 | 36.3 | 36.0 | 36.4 | 34.7 | 35.0 | 35.3 | 35.1 | 35.4 | 35.6 | 35.5 | 34.7 | 35.6 | 35.2 | 35.2 |
| M17        | T12       | Bladder  | 35.1 | 34.5 | 34.8 | 34.7 | 34.4 | 33.8 | 34.0 | 34.4 | 33.9 | 33.9 | 33.3 | 33.9 | 33.9 | 33.7 | 33.9 | 33.7 | 33.9 | 33.7 | 33.9 | 33.8 | 33.8 |
| M19        | Hot water | None     | 33.8 | 34.1 | 34.4 | 33.8 | 34.1 | 34.1 | 34.8 | 34.1 | 33.7 | 34.8 | 34.0 | 34.4 | 35.0 | 34.2 | 34.4 | 34.4 | 35.1 | 34.5 | 34.0 | 35.0 | 35.0 |
| M19        | T01       | Lung     | 33.6 | 33.4 | 33.5 | 33.6 | 33.7 | 34.5 | 35.3 | 35.2 | 34.9 | 34.1 | 33.6 | 33.4 | 33.9 | 34.0 | 34.2 | 34.7 | 34.6 | 33.8 | 34.0 | 33.7 | 33.7 |
| M19        | T02       | Spleen   | 33.1 | 33.4 | 33.8 | 33.4 | 33.8 | 34.7 | 34.1 | 34.4 | 33.9 | 33.3 | 33.9 | 34.0 | 34.0 | 34.2 | 34.1 | 34.5 | 34.3 | 34.5 | 34.3 | 32.8 | 32.8 |
| M19        | T03       | Colon    | 34.1 | 33.9 | 34.3 | 34.2 | 34.3 | 34.0 | 34.9 | 34.9 | 35.2 | 33.6 | 34.1 | 33.5 | 34.0 | 34.2 | 34.0 | 34.2 | 34.5 | 33.8 | 34.4 | 33.2 | 33.2 |
| M19        | T04a      | Stomach  | 35.0 | 35.1 | 34.9 | 35.1 | 35.6 | 35.2 | 34.6 | 35.0 | 35.2 | 35.0 | 34.3 | 34.0 | 34.6 | 34.3 | 34.7 | 35.1 | 34.2 | 34.7 | 34.4 | 33.9 | 33.9 |
| M19        | T04b      | Stomach  | 34.6 | 34.9 | 35.0 | 35.0 | 35.1 | 34.6 | 34.6 | 34.2 | 34.1 | 33.7 | 34.0 | 34.3 | 34.6 | 34.8 | 34.7 | 35.0 | 35.1 | 34.6 | 34.7 | 33.9 | 33.9 |
| M19        |           |          |      |      |      |      |      |      |      |      |      |      |      |      |      |      |      |      |      |      |      |      |      |



**Infrared imageries of human body activated by tea match the hypothesis of meridian system**

**(Supplementary Table 2 Continued)**

| Individual | Tea       | Meridian | VR5  | VR4  | VR3  | VR2  | VR1  | VL1  | VL2  | VL3  | VL4  | VL5  | DR5  | DR4  | DR3  | DR2  | DR1  | DL1  | DL2  | DL3  | DL4  | DL5  |
|------------|-----------|----------|------|------|------|------|------|------|------|------|------|------|------|------|------|------|------|------|------|------|------|------|
| M23        | Hot water | None     | 35.7 | 35.8 | 35.1 | 35.6 | 35.1 | 35.8 | 35.0 | 36.1 | 36.0 | 35.5 | 36.2 | 36.2 | 35.5 | 35.8 | 35.1 | 36.2 | 35.2 | 36.6 | 36.3 | 35.7 |
| M23        | T01       | Lung     | 34.9 | 35.3 | 35.3 | 35.2 | 35.6 | 35.6 | 35.2 | 35.2 | 34.9 | 34.7 | 34.5 | 34.8 | 34.5 | 34.8 | 35.2 | 35.5 | 34.8 | 35.0 | 34.5 | 34.5 |
| M23        | T02       | Spleen   | 34.4 | 34.8 | 35.2 | 34.6 | 34.8 | 34.5 | 34.9 | 34.9 | 34.9 | 34.3 | 34.2 | 34.3 | 34.7 | 34.0 | 33.7 | 34.1 | 33.9 | 34.2 | 33.9 | 33.6 |
| M23        | T03       | Colon    | 34.3 | 34.5 | 34.5 | 34.4 | 34.2 | 34.1 | 33.8 | 34.2 | 34.3 | 34.1 | 33.2 | 33.6 | 33.9 | 33.8 | 33.6 | 34.0 | 33.8 | 33.7 | 33.9 | 33.4 |
| M23        | T04a      | Stomach  | 36.3 | 36.2 | 36.1 | 34.4 | 34.9 | 34.5 | 34.4 | 34.6 | 34.5 | 34.5 | 34.2 | 34.3 | 34.2 | 34.6 | 34.4 | 35.1 | 35.3 | 35.4 | 35.4 | 34.7 |
| M23        | T04b      | Stomach  | 36.4 | 36.4 | 36.5 | 35.6 | 35.7 | 35.6 | 35.9 | 36.0 | 35.8 | 35.9 | 34.0 | 35.2 | 34.2 | 34.7 | 34.3 | 34.5 | 35.7 | 35.1 | 35.3 | 34.5 |
| M23        | T05       | Thymus   | 33.7 | 35.0 | 35.3 | 35.2 | 34.3 | 33.4 | 34.2 | 34.7 | 34.1 | 33.6 | 33.7 | 34.9 | 35.0 | 34.6 | 34.5 | 34.3 | 33.8 | 34.9 | 34.2 | 34.1 |
| M23        | T06       | Liver    | 34.2 | 35.2 | 35.4 | 34.9 | 34.5 | 33.7 | 35.6 | 35.8 | 34.8 | 34.0 | 33.4 | 34.1 | 34.1 | 33.4 | 33.4 | 33.8 | 33.6 | 34.4 | 34.6 | 33.5 |
| M23        | T06       | Liver    | 34.9 | 35.8 | 37.4 | 36.4 | 36.5 | 36.6 | 39.1 | 38.4 | 36.0 | 36.1 | 34.3 | 36.1 | 36.1 | 35.6 | 34.7 | 35.5 | 35.1 | 35.6 | 35.1 | 34.6 |
| M23        | T07       | HPT      | 34.3 | 34.7 | 34.5 | 34.6 | 34.5 | 34.3 | 35.9 | 35.7 | 34.9 | 33.9 | 32.8 | 33.7 | 33.1 | 33.7 | 33.3 | 33.7 | 33.1 | 33.6 | 33.3 | 32.7 |
| M23        | T08       | Gall     | 35.2 | 35.6 | 35.8 | 35.2 | 35.3 | 34.7 | 34.8 | 34.6 | 35.1 | 34.8 | 34.0 | 34.3 | 34.3 | 33.8 | 34.0 | 34.0 | 34.4 | 34.2 | 34.4 | 34.1 |
| M23        | T09       | Heart    | 32.9 | 32.7 | 32.8 | 32.4 | 32.5 | 32.7 | 33.0 | 33.4 | 32.7 | 32.9 | 31.7 | 32.6 | 32.2 | 31.9 | 32.2 | 32.6 | 32.2 | 32.0 | 32.7 | 31.6 |
| M23        | T10       | Kidney   | 34.4 | 34.7 | 34.5 | 34.2 | 34.3 | 33.9 | 34.4 | 34.3 | 34.2 | 34.3 | 34.4 | 34.7 | 33.9 | 33.5 | 33.7 | 33.5 | 33.7 | 34.0 | 33.6 | 33.3 |
| M23        | T11       | Duodenum | 35.5 | 35.5 | 35.5 | 35.6 | 35.1 | 35.2 | 34.9 | 35.4 | 35.5 | 35.5 | 34.6 | 34.5 | 34.6 | 34.1 | 34.7 | 34.8 | 34.6 | 34.8 | 34.0 | 32.8 |
| M23        | T12       | Bladder  | 36.3 | 36.0 | 35.9 | 35.7 | 35.8 | 35.4 | 35.9 | 35.8 | 35.9 | 35.8 | 34.4 | 34.7 | 34.7 | 34.9 | 35.0 | 35.2 | 34.9 | 34.9 | 34.9 | 34.4 |
| M25        | Hot water | None     | 31.7 | 32.4 | 31.5 | 31.8 | 31.4 | 31.7 | 32.6 | 31.7 | 32.2 | 31.5 | 32.3 | 32.6 | 31.7 | 32.3 | 31.6 | 32.2 | 32.9 | 31.9 | 32.6 | 31.6 |
| M25        | T01       | Lung     | 31.7 | 32.3 | 32.4 | 32.1 | 32.5 | 33.0 | 32.3 | 32.4 | 32.5 | 32.2 | 31.2 | 32.5 | 32.1 | 31.9 | 32.6 | 33.0 | 32.1 | 32.0 | 32.7 | 31.9 |
| M25        | T02       | Spleen   | 34.1 | 34.7 | 34.6 | 33.7 | 34.1 | 33.8 | 33.1 | 33.4 | 33.9 | 33.5 | 34.3 | 34.5 | 34.3 | 33.9 | 34.6 | 33.6 | 33.4 | 33.9 | 33.8 | 33.3 |
| M25        | T04a      | Stomach  | 35.9 | 36.0 | 35.8 | 35.4 | 35.6 | 35.9 | 35.6 | 35.8 | 36.0 | 35.7 | 34.7 | 35.3 | 35.2 | 35.2 | 35.1 | 35.7 | 35.0 | 35.5 | 35.7 | 34.9 |
| M25        | T04b      | Stomach  | 35.7 | 35.8 | 35.9 | 36.1 | 35.8 | 35.8 | 36.2 | 36.1 | 36.0 | 35.5 | 34.9 | 35.3 | 35.1 | 34.9 | 35.3 | 35.0 | 34.9 | 34.8 | 34.9 | 34.2 |
| M25        | T05       | Thymus   | 35.2 | 35.3 | 35.7 | 34.1 | 35.0 | 34.3 | 34.2 | 35.4 | 34.8 | 33.8 | 33.9 | 34.6 | 34.6 | 33.8 | 34.3 | 34.3 | 33.7 | 34.5 | 34.1 | 33.3 |
| M25        | T06       | Liver    | 34.9 | 36.0 | 36.0 | 35.2 | 36.0 | 35.7 | 34.7 | 35.2 | 36.0 | 34.7 | 33.9 | 35.2 | 34.7 | 33.6 | 34.6 | 34.8 | 34.2 | 34.8 | 34.9 | 33.9 |
| M25        | T07       | HPT      | 34.7 | 35.3 | 34.6 | 33.9 | 34.9 | 33.7 | 33.3 | 33.4 | 33.8 | 32.6 | 33.1 | 33.4 | 33.4 | 32.5 | 34.0 | 33.1 | 32.6 | 32.2 | 32.4 | 31.7 |
| M25        | T08       | Gall     | 34.1 | 35.2 | 34.9 | 34.5 | 34.1 | 34.2 | 34.3 | 34.1 | 34.4 | 34.1 | 33.2 | 32.9 | 33.8 | 33.2 | 34.0 | 34.4 | 33.7 | 34.3 | 34.1 | 32.8 |
| M25        | T09       | Heart    | 35.1 | 35.0 | 35.1 | 33.7 | 34.0 | 33.4 | 33.2 | 33.3 | 33.6 | 34.1 | 33.7 | 34.2 | 34.0 | 32.7 | 33.9 | 33.6 | 32.9 | 33.2 | 32.9 | 32.2 |
| M25        | T10       | Kidney   | 34.5 | 35.6 | 35.6 | 34.6 | 33.8 | 33.3 | 33.5 | 34.4 | 34.7 | 34.1 | 33.2 | 33.3 | 33.4 | 33.3 | 33.7 | 33.9 | 33.5 | 33.3 | 34.1 | 33.6 |
| M25        | T12       | Bladder  | 34.8 | 34.3 | 34.2 | 33.9 | 34.1 | 34.0 | 34.0 | 34.1 | 34.0 | 34.0 | 33.6 | 33.6 | 33.8 | 33.4 | 34.0 | 34.3 | 33.6 | 34.1 | 33.8 | 33.2 |
| M27        | Hot water | None     | 34.1 | 34.7 | 34.1 | 35.1 | 34.3 | 34.8 | 33.8 | 34.8 | 35.2 | 34.0 | 34.2 | 34.9 | 34.4 | 35.6 | 34.6 | 35.1 | 34.0 | 35.3 | 35.5 | 34.1 |
| M27        | T01       | Lung     | 34.3 | 35.4 | 35.2 | 36.0 | 35.7 | 36.6 | 35.9 | 35.0 | 34.5 | 34.8 | 33.8 | 34.5 | 34.9 | 34.7 | 35.5 | 35.6 | 35.1 | 34.7 | 35.0 | 34.0 |
| M27        | T02       | Spleen   | 35.5 | 37.3 | 35.7 | 35.0 | 35.6 | 35.0 | 34.5 | 34.7 | 34.7 | 34.7 | 34.3 | 34.9 | 34.7 | 34.2 | 35.3 | 34.7 | 34.4 | 34.6 | 34.4 | 34.0 |
| M27        | T03       | Colon    | 34.6 | 35.7 | 35.6 | 35.6 | 35.5 | 35.5 | 35.9 | 35.4 | 35.1 | 34.9 | 35.3 | 35.4 | 35.2 | 35.7 | 35.6 | 35.4 | 35.9 | 35.3 | 34.8 | 34.2 |
| M27        | T04a      | Stomach  | 37.1 | 37.3 | 37.3 | 36.2 | 36.9 | 36.7 | 36.6 | 36.9 | 37.4 | 36.7 | 36.8 | 37.0 | 37.0 | 36.9 | 36.7 | 37.0 | 37.1 | 37.3 | 37.1 | 36.9 |
| M27        | T04b      | Stomach  | 37.0 | 37.1 | 37.9 | 37.5 | 36.8 | 37.6 | 37.0 | 37.0 | 37.1 | 36.8 | 36.5 | 36.7 | 36.8 | 36.4 | 36.3 | 36.9 | 36.8 | 36.9 | 36.9 | 36.7 |
| M27        | T05       | Thymus   | 35.8 | 36.3 | 37.2 | 36.0 | 36.6 | 36.2 | 34.9 | 35.1 | 35.4 | 36.1 | 35.2 | 35.6 | 36.0 | 35.3 | 35.8 | 35.7 | 35.3 | 35.8 | 35.4 | 35.0 |
| M27        | T06       | Liver    | 36.3 | 36.3 | 36.5 | 35.8 | 35.9 | 35.4 | 35.3 | 35.4 | 35.6 | 35.8 | 35.4 | 35.6 | 35.6 | 35.3 | 35.5 | 35.4 | 35.1 | 35.2 | 35.4 | 34.9 |
| M27        | T07       | HPT      | 35.2 | 36.0 | 36.1 | 36.0 | 35.6 | 35.7 | 35.5 | 35.8 | 35.9 | 35.5 | 34.9 | 35.2 | 35.3 | 35.4 | 35.5 | 35.7 | 35.4 | 35.4 | 35.1 | 34.7 |
| M27        | T08       | Gall     | 35.3 | 35.8 | 35.7 | 35.6 | 35.6 | 35.4 | 35.5 | 35.7 | 35.7 | 35.1 | 35.0 | 35.3 | 35.0 | 35.0 | 35.5 | 35.5 | 35.2 | 35.4 | 35.2 | 35.0 |
| M27        | T09       | Heart    | 36.3 | 35.8 | 35.8 | 35.6 | 35.6 | 35.5 | 35.3 | 35.6 | 35.7 | 35.7 | 34.1 | 35.0 | 34.8 | 34.6 | 36.0 | 35.7 | 34.8 | 34.8 | 35.6 | 34.8 |
| M27        | T10       | Kidney   | 35.5 | 35.8 | 35.7 | 35.7 | 35.3 | 35.9 | 35.5 | 35.7 | 35.8 | 36.0 | 34.8 | 35.5 | 35.3 | 35.2 | 35.6 | 35.7 | 35.2 | 35.4 | 35.5 | 35.2 |
| M27        | T11       | Duodenum | 36.4 | 35.9 | 36.1 | 36.0 | 35.8 | 35.8 | 36.0 | 36.2 | 36.0 | 36.2 | 34.7 | 35.3 | 35.1 | 35.3 | 35.5 | 35.8 | 35.6 | 35.8 | 35.0 | 34.9 |
| M27        | T12       | Bladder  | 35.3 | 34.9 | 35.2 | 34.9 | 34.9 | 35.0 | 34.7 | 34.8 | 34.7 | 34.7 | 34.6 | 35.0 | 35.1 | 35.0 | 35.2 | 35.1 | 34.8 | 34.8 | 34.4 | 34.4 |
| M29        | Hot water | None     | 33.9 | 34.0 | 33.7 | 33.7 | 33.5 | 34.2 | 33.5 | 33.8 | 33.6 | 33.8 | 34.1 | 34.3 | 34.1 | 34.0 | 33.8 | 34.5 | 33.8 | 34.4 | 33.9 | 34.3 |
| M29        | T01       | Lung     | 34.4 | 35.5 | 35.2 | 34.2 | 35.2 | 33.7 | 33.4 | 33.1 | 33.2 | 32.8 | 32.5 | 33.3 | 33.2 | 33.3 | 34.0 | 33.9 | 33.2 | 33.0 | 33.1 | 32.4 |
| M29        | T02       | Spleen   | 32.8 | 33.4 | 33.3 | 33.2 | 34.3 | 33.1 | 32.9 | 33.0 | 32.4 | 32.1 | 33.0 | 33.4 | 33.5 | 33.5 | 34.1 | 34.3 | 33.3 | 33.6 | 33.8 | 32.8 |
| M29        | T03       | Colon    | 33.5 | 34.2 | 34.8 | 34.7 | 34.0 | 33.1 | 34.2 | 33.5 | 33.2 | 33.0 | 33.2 | 33.7 | 33.4 | 34.3 | 33.8 | 34.3 | 34.0 | 33.8 | 33.7 | 32.6 |
| M29        | T04a      | Stomach  | 35.7 | 35.8 | 36.0 | 35.9 | 35.7 | 35.0 | 34.4 | 34.0 | 34.7 | 34.5 | 34.1 | 34.3 | 34.1 | 34.1 | 34.4 | 34.4 | 34.4 | 34.3 | 34.8 | 34.6 |
| M29        | T04b      | Stomach  | 35.2 | 35.8 | 36.0 | 35.4 | 36.0 | 35.8 | 35.7 | 35.9 | 35.5 | 34.9 | 33.6 | 34.1 | 34.1 | 34.2 | 34.8 | 34.6 | 34.4 | 34.4 | 34.2 | 33.9 |
| M29        | T05       | Thymus   | 33.9 | 34.9 | 36.0 | 35.1 | 34.3 | 34.8 | 35.0 | 35.7 | 34.5 | 33.5 | 32.7 | 33.2 | 34.4 | 33.3 | 34.3 | 34.5 | 33.7 | 34.4 | 33.7 | 33.4 |
| M29        | T06       | Liver    | 34.5 | 35.2 | 34.7 | 34.2 | 34.6 | 33.6 | 33.5 | 33.4 | 33.2 | 33.3 | 32.9 | 33.8 | 33.7 | 33.5 | 34.3 | 34.1 | 33.4 | 32.9 | 32.5 | 33.0 |
| M29        | T07       | HPT      | 33.6 | 35.1 | 36.3 | 35.6 | 35.5 | 33.9 | 33.3 | 35.3 | 34.4 | 33.7 | 31.8 | 32.1 | 32.6 | 31.6 | 32.7 | 32.3 | 31.6 | 32.1 | 32.2 | 31.2 |
| M29        | T08       | Gall     | 34.2 | 35.0 | 34.6 | 33.8 | 34.7 | 34.4 | 34.7 | 35.2 | 34.6 | 33.6 | 32.4 | 33.4 | 33.4 | 33.0 | 33.6 | 34.3 | 33.6 | 33.2 | 33.8 | 32.8 |
| M29        | T09       | Heart    | 35.5 | 35.8 | 35.7 | 34.9 | 34.0 | 34.3 | 34.0 | 34.3 | 34.2 | 33.6 | 31.8 | 33.2 | 32.3 | 32.7 | 32.6 | 32.7 | 32.4 | 33.0 | 33.4 | 32.6 |
| M29        | T10       | Kidney   | 33.2 | 33.4 | 32.8 | 32.4 | 33.1 | 32.8 | 32.2 | 32.7 | 32.5 | 32.1 | 31.9 | 32.9 | 32.4 | 32.2 | 32.8 | 33.5 | 32.5 | 32.7 | 32.7 | 32.1 |
| M29        | T11       | Duodenum | 33.6 | 33.4 | 33.7 | 33.6 | 33.8 | 34.1 | 33.7 | 33.9 | 33.7 | 33.7 | 33.3 | 33.7 | 33.2 | 33.2 | 33.6 | 33.6 | 33.5 | 33.6 | 33.8 | 33.6 |
| M29        | T12       | Bladder  | 33.1 | 33.8 | 34.0 | 33.9 | 33.9 | 33.4 | 34.3 | 34.4 | 34.4 | 34.5 | 33.4 | 33.9 | 33.9 | 33.8 | 34.1 | 34.1 | 34.0 | 33.9 | 34.1 | 33.9 |
| F02        | Hot water | None     | 34.7 | 34.7 | 34.0 | 34.7 | 35.0 | 35.1 | 34.5 | 34.9 | 34.8 | 33.9 | 35.2 | 35.2 | 34.1 | 35.0 | 35.5 | 35.7 | 34.9 | 35.0 | 35.1 | 34.2 |
| F02        | T01a      | Lung     | 33.6 | 33.8 | 34.2 | 34.2 | 33.8 | 34.2 | 34.5 | 34.1 | 33.8 | 33.6 | 34.3 | 34.8 | 34.1 | 34.9 | 34.7 | 33.9 | 34.9 | 33.8 | 34.0 | 33.8 |
| F02        | T01b      | Lung     | 34.1 | 34.5 | 35.6 | 34.9 | 34.6 | 34.4 | 35.4 | 35.1 | 34.2 | 34.0 | 34.3 | 34.8 | 34.1 | 34.9 | 34.7 | 33.9 | 34.9 | 33.8 | 34.0 | 33.8 |
| F02        | T02       | Spleen   | 33.4 | 33.5 | 33.7 | 33.2 | 33.6 | 33.5 | 33.6 | 34.0 | 34.0 |      |      |      |      |      |      |      |      |      |      |      |

Infrared imageries of human body activated by tea match the hypothesis of meridian system

(Supplementary Table 2 Continued)

| Individual | Tea       | Meridian | VR5  | VR4  | VR3  | VR2  | VR1  | VL1  | VL2  | VL3  | VL4  | VL5  | DR5  | DR4  | DR3  | DR2  | DR1  | DL1  | DL2  | DL3  | DL4  | DL5  |
|------------|-----------|----------|------|------|------|------|------|------|------|------|------|------|------|------|------|------|------|------|------|------|------|------|
| F06        | Hot water | None     | 34.2 | 34.5 | 35.0 | 34.6 | 34.7 | 33.7 | 34.9 | 34.3 | 34.7 | 34.6 | 34.6 | 34.5 | 35.3 | 34.8 | 34.8 | 34.0 | 35.2 | 34.6 | 35.1 | 34.9 |
| F06        | T01a      | Lung     | 34.5 | 34.6 | 34.4 | 34.5 | 34.0 | 34.7 | 34.8 | 34.5 | 34.6 | 34.3 | 33.6 | 34.4 | 34.3 | 34.0 | 34.1 | 34.0 | 33.6 | 34.2 | 34.0 | 33.6 |
| F06        | T01b      | Lung     | 34.2 | 34.4 | 34.5 | 34.2 | 34.1 | 34.3 | 34.6 | 34.3 | 34.2 | 34.2 | 33.8 | 34.0 | 34.0 | 34.4 | 34.4 | 33.9 | 33.9 | 33.7 | 33.6 | 33.1 |
| F06        | T02       | Spleen   | 34.2 | 34.2 | 34.8 | 35.3 | 33.8 | 34.2 | 34.8 | 35.3 | 34.6 | 34.2 | 33.5 | 34.2 | 33.8 | 33.9 | 34.2 | 33.6 | 33.8 | 33.6 | 33.7 | 33.3 |
| F06        | T03       | Colon    | 32.7 | 32.5 | 32.7 | 32.0 | 32.7 | 33.5 | 32.5 | 32.6 | 32.2 | 32.3 | 33.1 | 33.8 | 33.6 | 33.7 | 33.7 | 34.1 | 33.9 | 33.8 | 33.7 | 33.4 |
| F06        | T04a      | Stomach  | 34.0 | 33.9 | 34.9 | 34.0 | 33.7 | 34.1 | 34.5 | 33.8 | 33.8 | 33.3 | 32.7 | 33.1 | 33.3 | 33.4 | 33.1 | 33.1 | 33.1 | 33.1 | 33.1 | 32.9 |
| F06        | T04b      | Stomach  | 34.3 | 34.4 | 34.6 | 35.1 | 34.1 | 34.5 | 34.3 | 34.3 | 34.4 | 34.0 | 34.1 | 33.9 | 34.4 | 34.5 | 34.2 | 34.6 | 34.0 | 34.1 | 34.0 | 33.8 |
| F06        | T05       | Thymus   | 31.6 | 33.0 | 33.1 | 33.1 | 31.7 | 32.8 | 33.3 | 33.0 | 32.0 | 31.4 | 30.1 | 30.6 | 30.4 | 31.7 | 32.0 | 32.5 | 31.8 | 31.4 | 30.3 | 30.4 |
| F06        | T06       | Liver    | 34.6 | 34.7 | 34.8 | 34.8 | 33.9 | 34.5 | 34.9 | 35.3 | 34.6 | 34.6 | 33.6 | 34.4 | 34.3 | 33.8 | 34.5 | 34.3 | 34.1 | 34.2 | 34.3 | 33.5 |
| F06        | T07       | HPT      | 34.5 | 34.6 | 34.7 | 35.3 | 34.6 | 34.8 | 35.3 | 34.9 | 34.8 | 34.6 | 34.2 | 34.8 | 34.7 | 34.8 | 34.7 | 34.2 | 34.4 | 34.4 | 34.5 | 34.0 |
| F06        | T08       | Gall     | 34.6 | 35.9 | 36.0 | 34.9 | 35.0 | 35.1 | 35.4 | 36.2 | 35.4 | 34.8 | 34.0 | 34.5 | 34.6 | 34.4 | 34.6 | 34.3 | 34.2 | 34.6 | 34.6 | 34.0 |
| F06        | T09       | Heart    | 32.6 | 34.9 | 35.0 | 34.6 | 33.1 | 33.4 | 34.4 | 35.3 | 33.8 | 32.6 | 31.9 | 32.1 | 32.6 | 32.8 | 32.7 | 32.7 | 32.3 | 32.3 | 32.1 | 30.8 |
| F06        | T10       | Kidney   | 33.0 | 34.2 | 35.3 | 35.1 | 33.5 | 33.7 | 34.6 | 35.6 | 34.0 | 33.0 | 31.6 | 32.6 | 32.8 | 32.8 | 33.1 | 32.4 | 32.7 | 32.4 | 32.0 | 31.4 |
| F06        | T11       | Duodenum | 34.6 | 35.0 | 35.8 | 34.7 | 34.3 | 35.0 | 35.0 | 35.2 | 34.9 | 34.6 | 34.2 | 34.7 | 34.6 | 34.4 | 34.7 | 34.5 | 34.3 | 34.6 | 34.4 | 33.8 |
| F06        | T12       | Bladder  | 35.2 | 36.8 | 37.5 | 35.4 | 35.1 | 34.9 | 35.8 | 35.0 | 34.8 | 34.4 | 33.8 | 34.4 | 34.6 | 34.2 | 34.0 | 34.3 | 33.9 | 34.4 | 34.0 | 33.5 |
| F08        | Hot water | None     | 34.1 | 34.8 | 34.7 | 34.0 | 34.0 | 34.7 | 33.8 | 33.7 | 33.9 | 34.3 | 34.6 | 35.0 | 34.9 | 34.3 | 34.3 | 34.9 | 33.9 | 33.9 | 34.0 | 34.4 |
| F08        | T01a      | Lung     | 34.0 | 34.4 | 35.0 | 34.8 | 33.7 | 34.1 | 35.0 | 34.7 | 34.3 | 33.5 | 34.0 | 34.4 | 34.0 | 33.9 | 35.6 | 34.5 | 33.4 | 33.5 | 34.0 | 32.9 |
| F08        | T01b      | Lung     | 35.4 | 37.0 | 36.6 | 35.4 | 34.8 | 34.7 | 35.5 | 36.6 | 36.3 | 34.0 | 34.0 | 34.1 | 34.0 | 33.8 | 34.1 | 34.5 | 33.6 | 33.6 | 34.0 | 33.7 |
| F08        | T02       | Spleen   | 33.8 | 34.5 | 34.5 | 34.4 | 33.5 | 33.7 | 34.2 | 34.2 | 33.8 | 33.3 | 33.5 | 34.0 | 33.8 | 34.0 | 34.3 | 34.3 | 33.4 | 33.8 | 33.4 | 32.5 |
| F08        | T03       | Colon    | 33.8 | 33.8 | 33.5 | 33.6 | 33.6 | 34.8 | 33.9 | 33.8 | 33.5 | 33.1 | 33.9 | 34.2 | 34.0 | 33.9 | 34.6 | 34.2 | 33.8 | 33.7 | 33.7 | 33.3 |
| F08        | T04a      | Stomach  | 33.0 | 34.0 | 34.6 | 34.2 | 33.8 | 33.8 | 33.7 | 33.5 | 33.2 | 32.3 | 33.6 | 33.6 | 33.4 | 33.6 | 33.9 | 33.9 | 33.3 | 33.2 | 33.3 | 32.6 |
| F08        | T04b      | Stomach  | 35.0 | 36.0 | 36.2 | 35.4 | 34.8 | 34.8 | 34.9 | 35.0 | 35.7 | 34.6 | 34.7 | 34.5 | 34.6 | 34.5 | 34.4 | 34.9 | 34.4 | 34.4 | 34.5 | 34.2 |
| F08        | T05       | Thymus   | 33.7 | 36.5 | 37.2 | 34.3 | 32.7 | 33.6 | 34.6 | 36.4 | 36.7 | 34.2 | 31.0 | 31.8 | 31.7 | 31.7 | 33.3 | 34.7 | 32.9 | 32.5 | 32.7 | 32.7 |
| F08        | T06       | Liver    | 33.7 | 34.1 | 34.1 | 34.2 | 34.1 | 34.0 | 34.2 | 33.6 | 33.5 | 33.5 | 33.1 | 33.6 | 33.6 | 33.5 | 33.8 | 33.4 | 33.5 | 33.1 | 33.1 | 32.9 |
| F08        | T07       | HPT      | 35.3 | 36.3 | 36.4 | 35.0 | 34.8 | 35.0 | 34.8 | 36.5 | 36.9 | 35.1 | 34.3 | 34.4 | 34.4 | 34.4 | 34.6 | 34.7 | 34.1 | 34.2 | 34.6 | 34.0 |
| F08        | T08       | Gall     | 34.1 | 34.7 | 35.2 | 35.0 | 34.4 | 34.6 | 34.8 | 35.1 | 35.1 | 34.2 | 33.6 | 34.2 | 34.4 | 34.2 | 34.3 | 34.5 | 34.0 | 34.0 | 33.9 | 33.4 |
| F08        | T09       | Heart    | 33.2 | 33.8 | 34.3 | 34.9 | 33.3 | 34.0 | 34.5 | 34.6 | 34.2 | 32.9 | 32.2 | 33.2 | 33.3 | 33.5 | 34.4 | 34.2 | 33.0 | 32.9 | 32.1 | 31.7 |
| F08        | T10       | Kidney   | 32.8 | 34.5 | 34.9 | 35.6 | 34.1 | 34.4 | 34.8 | 34.9 | 35.3 | 33.1 | 32.5 | 33.1 | 32.6 | 33.2 | 33.2 | 33.8 | 32.9 | 32.5 | 32.8 | 32.6 |
| F08        | T11       | Duodenum | 33.4 | 33.8 | 34.8 | 34.6 | 33.7 | 34.1 | 34.2 | 35.3 | 35.9 | 33.8 | 33.1 | 33.9 | 33.8 | 33.5 | 34.9 | 33.7 | 33.4 | 33.4 | 33.5 | 33.1 |
| F08        | T12       | Bladder  | 34.5 | 36.9 | 36.1 | 35.6 | 34.0 | 34.8 | 35.8 | 36.7 | 35.6 | 33.8 | 34.6 | 34.6 | 34.4 | 34.1 | 34.8 | 34.4 | 34.0 | 34.0 | 34.0 | 34.2 |
| F10        | Hot water | None     | 33.6 | 34.1 | 34.1 | 33.6 | 33.6 | 34.1 | 34.4 | 34.0 | 33.7 | 33.5 | 33.7 | 34.4 | 34.3 | 34.1 | 33.8 | 34.3 | 34.8 | 34.2 | 33.8 | 34.1 |
| F10        | T01a      | Lung     | 33.0 | 34.7 | 36.2 | 34.2 | 34.7 | 34.2 | 34.2 | 34.0 | 34.0 | 34.0 | 33.5 | 34.2 | 33.8 | 34.0 | 34.0 | 33.7 | 34.2 | 34.2 | 33.9 | 34.0 |
| F10        | T01b      | Lung     | 33.7 | 35.6 | 35.9 | 34.2 | 34.4 | 34.2 | 34.2 | 34.0 | 34.0 | 33.8 | 33.3 | 33.4 | 33.6 | 33.5 | 34.1 | 33.9 | 33.6 | 33.4 | 33.2 | 33.0 |
| F10        | T02       | Spleen   | 32.1 | 33.6 | 36.1 | 32.9 | 32.7 | 32.7 | 34.6 | 34.7 | 33.6 | 32.6 | 32.0 | 32.3 | 32.4 | 32.8 | 33.2 | 32.6 | 32.8 | 32.4 | 32.2 | 31.5 |
| F10        | T03       | Colon    | 33.3 | 34.1 | 33.9 | 33.6 | 33.6 | 33.8 | 34.5 | 34.8 | 34.4 | 33.4 | 33.1 | 33.3 | 33.2 | 33.4 | 33.3 | 33.8 | 33.8 | 33.4 | 33.3 | 33.5 |
| F10        | T04a      | Stomach  | 32.8 | 34.0 | 33.6 | 33.2 | 32.6 | 32.6 | 33.2 | 33.1 | 32.9 | 32.3 | 32.5 | 32.7 | 32.5 | 32.5 | 33.0 | 33.0 | 32.6 | 32.3 | 32.3 | 32.0 |
| F10        | T04b      | Stomach  | 33.3 | 34.1 | 34.4 | 34.0 | 33.5 | 33.9 | 34.2 | 33.7 | 33.6 | 33.2 | 32.9 | 33.4 | 33.4 | 33.7 | 33.8 | 33.1 | 33.2 | 32.9 | 32.6 | 32.6 |
| F10        | T05       | Thymus   | 32.2 | 34.1 | 36.5 | 34.3 | 33.4 | 33.6 | 36.4 | 37.9 | 37.0 | 32.4 | 31.8 | 32.5 | 32.7 | 32.7 | 33.9 | 33.4 | 33.0 | 33.3 | 32.7 | 31.8 |
| F10        | T06       | Liver    | 33.1 | 33.4 | 34.0 | 33.9 | 33.2 | 33.6 | 33.4 | 33.8 | 33.4 | 32.5 | 33.7 | 33.9 | 33.9 | 33.5 | 33.5 | 33.6 | 32.8 | 32.7 | 33.6 | 33.1 |
| F10        | T07       | HPT      | 32.8 | 33.1 | 33.4 | 33.0 | 33.4 | 33.1 | 33.4 | 33.9 | 33.8 | 33.0 | 33.3 | 33.9 | 33.4 | 33.2 | 34.2 | 33.5 | 33.1 | 33.1 | 33.1 | 33.3 |
| F10        | T08       | Gall     | 32.5 | 36.0 | 35.5 | 34.1 | 33.4 | 33.3 | 33.4 | 34.1 | 35.4 | 32.5 | 32.3 | 33.0 | 32.9 | 32.8 | 33.3 | 32.9 | 32.4 | 34.2 | 32.7 | 31.9 |
| F10        | T09       | Heart    | 32.9 | 35.6 | 37.6 | 36.6 | 33.1 | 33.9 | 35.6 | 35.5 | 34.5 | 32.7 | 32.7 | 33.3 | 33.2 | 33.2 | 33.6 | 33.3 | 33.2 | 33.1 | 33.1 | 32.8 |
| F10        | T10       | Kidney   | 32.9 | 33.6 | 34.0 | 34.3 | 33.6 | 33.3 | 34.7 | 34.7 | 33.7 | 33.3 | 33.0 | 33.3 | 33.4 | 33.5 | 33.8 | 33.7 | 33.0 | 32.9 | 32.9 | 33.3 |
| F10        | T11       | Duodenum | 33.6 | 33.9 | 34.6 | 34.1 | 34.0 | 33.9 | 34.0 | 35.2 | 34.3 | 33.6 | 33.8 | 33.9 | 33.9 | 33.4 | 33.8 | 33.3 | 33.7 | 33.7 | 33.6 | 33.5 |
| F10        | T12       | Bladder  | 32.8 | 33.7 | 35.0 | 34.5 | 34.1 | 34.3 | 34.5 | 35.3 | 35.1 | 33.4 | 33.6 | 33.7 | 33.8 | 33.7 | 33.6 | 33.2 | 32.9 | 33.7 | 33.4 | 33.6 |
| F12        | T01a      | Lung     | 32.0 | 32.6 | 34.7 | 33.8 | 33.9 | 33.2 | 34.7 | 35.2 | 34.9 | 32.6 | 31.4 | 31.7 | 32.1 | 31.9 | 33.6 | 32.8 | 32.0 | 32.2 | 32.7 | 32.0 |
| F12        | T01b      | Lung     | 32.8 | 34.3 | 34.9 | 33.4 | 32.9 | 34.0 | 33.8 | 34.9 | 33.6 | 33.3 | 32.2 | 32.6 | 32.7 | 32.7 | 32.9 | 33.0 | 33.1 | 32.8 | 32.7 | 32.3 |
| F12        | T02       | Spleen   | 33.3 | 34.1 | 35.5 | 34.8 | 33.6 | 34.4 | 35.0 | 34.7 | 36.7 | 33.9 | 32.2 | 32.9 | 32.8 | 33.0 | 32.8 | 32.9 | 32.7 | 32.6 | 32.8 | 32.3 |
| F12        | T05       | Thymus   | 33.8 | 34.7 | 35.8 | 34.3 | 33.3 | 34.2 | 34.3 | 36.1 | 36.8 | 35.3 | 32.9 | 33.4 | 33.1 | 32.8 | 33.3 | 34.2 | 32.9 | 32.5 | 32.7 | 32.6 |
| F12        | T06       | Liver    | 33.0 | 33.3 | 33.2 | 33.1 | 33.0 | 32.9 | 32.3 | 32.6 | 32.8 | 32.6 | 34.2 | 34.4 | 33.6 | 34.4 | 34.3 | 34.4 | 33.9 | 33.8 | 34.1 | 33.7 |
| F12        | T07       | HPT      | 33.3 | 35.6 | 33.8 | 33.1 | 33.4 | 33.7 | 34.2 | 34.6 | 34.6 | 32.9 | 32.8 | 32.7 | 32.8 | 32.6 | 33.0 | 33.4 | 32.8 | 32.8 | 32.9 | 32.3 |
| F12        | T09       | Heart    | 33.6 | 36.4 | 36.6 | 34.5 | 33.1 | 33.8 | 35.7 | 35.5 | 35.0 | 33.6 | 32.2 | 33.2 | 33.1 | 33.2 | 33.6 | 32.9 | 32.8 | 32.6 | 32.6 | 32.3 |
| F12        | T10       | Kidney   | 33.6 | 33.7 | 34.1 | 33.8 | 33.6 | 33.9 | 34.1 | 34.2 | 33.8 | 33.7 | 31.8 | 32.7 | 32.6 | 32.8 | 33.2 | 33.0 | 32.2 | 32.5 | 32.1 | 32.0 |
| F14        | Hot water | None     | 32.7 | 33.5 | 33.8 | 33.3 | 34.0 | 33.7 | 33.0 | 34.0 | 32.6 | 32.9 | 32.9 | 33.6 | 34.0 | 33.4 | 34.1 | 33.9 | 33.5 | 34.5 | 32.6 | 33.0 |
| F14        | T01a      | Lung     | 33.1 | 33.9 | 36.0 | 35.3 | 32.9 | 33.4 | 33.3 | 33.4 | 33.1 | 32.7 | 31.8 | 32.6 | 32.7 | 33.4 | 32.3 | 32.7 | 32.6 | 32.7 | 32.7 | 31.9 |
| F14        | T01b      | Lung     | 32.9 | 33.1 | 34.2 | 35.0 | 32.4 | 33.9 | 34.2 | 34.6 | 34.5 | 33.1 | 32.1 | 32.5 | 33.0 | 33.7 | 32.8 | 33.4 | 33.2 | 33.0 | 33.6 | 31.7 |
| F14        | T02       | Spleen   | 32.8 | 34.4 | 36.5 | 35.9 | 32.8 | 34.4 | 34.4 | 34.3 | 32.6 | 31.6 | 31.8 | 32.9 | 33.0 | 32.8 | 32.2 | 32.8 | 32.4 | 31.9 | 32.0 | 30.6 |
| F14        | T03       | Colon    | 34.0 | 33.9 | 34.0 | 35.1 | 33.9 | 33.4 | 35.2 | 34.5 | 33.6 | 33.5 | 33.4 | 33.9 | 34.2 | 34.2 | 33.4 | 34.0 | 33.8 | 34.2 | 34.0 | 33.2 |
| F14        | T04a      | Stomach  | 33.7 | 34.1 | 34.6 | 35.7 | 33.5 | 33.8 | 33.9 | 34.1 | 33.5 | 3    |      |      |      |      |      |      |      |      |      |      |

Infrared imageries of human body activated by tea match the hypothesis of meridian system

(Supplementary Table 2 Continued)

| Individual | Tea       | Meridian | VR5  | VR4  | VR3  | VR2  | VR1  | VL1  | VL2  | VL3  | VL4  | VL5  | DR5  | DR4  | DR3  | DR2  | DR1  | DL1  | DL2  | DL3  | DL4  | DL5  |
|------------|-----------|----------|------|------|------|------|------|------|------|------|------|------|------|------|------|------|------|------|------|------|------|------|
| F20        | T03       | Colon    | 34.6 | 34.9 | 35.0 | 34.9 | 34.7 | 34.9 | 35.2 | 34.6 | 34.4 | 34.2 | 33.9 | 34.3 | 34.6 | 34.3 | 34.4 | 34.3 | 34.3 | 34.5 | 33.8 | 33.8 |
| F20        | T04a      | Stomach  | 34.0 | 34.2 | 35.4 | 34.6 | 34.0 | 34.5 | 33.9 | 34.8 | 34.0 | 33.9 | 33.8 | 34.3 | 34.5 | 34.5 | 34.4 | 34.6 | 34.3 | 34.7 | 34.4 | 34.1 |
| F20        | T04b      | Stomach  | 34.2 | 34.4 | 34.6 | 34.2 | 34.4 | 34.1 | 34.4 | 34.4 | 34.3 | 34.1 | 34.5 | 34.8 | 34.4 | 34.8 | 34.7 | 34.8 | 34.7 | 34.6 | 34.5 | 34.5 |
| F20        | T05       | Thymus   | 33.7 | 33.9 | 34.7 | 34.5 | 35.0 | 35.0 | 34.2 | 34.5 | 33.9 | 33.9 | 34.7 | 34.9 | 36.2 | 36.1 | 36.4 | 36.9 | 35.5 | 36.5 | 34.7 | 34.3 |
| F20        | T06       | Liver    | 34.6 | 35.3 | 35.1 | 35.0 | 35.0 | 35.4 | 35.9 | 35.0 | 35.3 | 34.9 | 33.6 | 34.2 | 34.5 | 34.7 | 34.2 | 34.0 | 34.5 | 34.5 | 34.9 | 33.1 |
| F20        | T07       | HPT      | 35.4 | 35.5 | 35.7 | 35.7 | 35.4 | 35.5 | 35.5 | 35.4 | 35.4 | 35.4 | 34.9 | 35.1 | 35.4 | 34.9 | 35.4 | 35.5 | 35.2 | 35.0 | 34.7 | 34.6 |
| F20        | T08       | Gall     | 35.4 | 35.6 | 35.4 | 35.6 | 35.7 | 35.8 | 37.8 | 36.8 | 35.5 | 35.4 | 34.6 | 35.2 | 35.1 | 35.2 | 35.2 | 35.1 | 35.2 | 35.3 | 34.9 | 34.3 |
| F20        | T09       | Heart    | 34.3 | 34.2 | 34.9 | 34.4 | 34.6 | 34.3 | 34.6 | 34.4 | 33.8 | 33.6 | 33.4 | 34.2 | 34.7 | 34.4 | 34.8 | 34.6 | 34.4 | 34.6 | 34.1 | 33.8 |
| F20        | T10       | Kidney   | 34.7 | 34.8 | 35.6 | 36.0 | 35.0 | 35.3 | 35.5 | 35.1 | 35.1 | 34.9 | 34.4 | 34.6 | 35.1 | 35.0 | 34.9 | 34.8 | 34.8 | 34.7 | 34.6 | 34.2 |
| F20        | T11       | Duodenum | 34.6 | 35.1 | 35.2 | 35.3 | 35.4 | 35.2 | 37.5 | 35.2 | 34.7 | 34.6 | 33.8 | 34.4 | 34.6 | 34.4 | 34.5 | 34.5 | 34.5 | 34.7 | 34.3 | 33.9 |
| F20        | T12       | Bladder  | 35.0 | 35.5 | 36.5 | 36.6 | 35.9 | 36.0 | 36.0 | 34.4 | 35.2 | 35.1 | 34.6 | 34.7 | 35.3 | 34.6 | 34.9 | 34.7 | 34.9 | 35.2 | 34.7 | 34.4 |
| F22        | Hot water | None     | 32.3 | 32.6 | 32.4 | 32.0 | 32.4 | 32.1 | 32.7 | 32.0 | 32.2 | 31.6 | 32.6 | 32.9 | 32.6 | 32.1 | 32.9 | 32.3 | 33.1 | 32.5 | 32.5 | 31.8 |
| F22        | T01a      | Lung     | 31.1 | 31.4 | 32.5 | 32.2 | 32.9 | 33.0 | 32.6 | 33.2 | 32.1 | 31.4 | 30.8 | 31.7 | 32.0 | 32.0 | 32.3 | 32.9 | 31.8 | 32.3 | 32.1 | 31.6 |
| F22        | T01b      | Lung     | 32.1 | 32.5 | 34.4 | 34.2 | 33.0 | 33.4 | 33.0 | 32.6 | 32.6 | 32.1 | 31.7 | 31.6 | 31.9 | 32.1 | 32.6 | 32.5 | 32.7 | 32.3 | 32.2 | 32.0 |
| F22        | T02       | Spleen   | 31.1 | 34.6 | 35.9 | 34.1 | 32.1 | 32.7 | 36.7 | 37.3 | 33.2 | 31.8 | 31.7 | 32.9 | 32.7 | 32.5 | 32.1 | 32.2 | 33.3 | 32.8 | 32.7 | 32.0 |
| F22        | T03       | Colon    | 32.7 | 32.3 | 32.4 | 32.7 | 33.0 | 33.5 | 34.1 | 32.7 | 33.0 | 32.3 | 32.5 | 32.6 | 32.5 | 32.8 | 33.0 | 33.0 | 32.8 | 32.4 | 32.3 | 31.9 |
| F22        | T04a      | Stomach  | 32.3 | 32.5 | 32.8 | 33.8 | 32.6 | 33.4 | 33.0 | 33.8 | 32.5 | 32.4 | 31.3 | 32.0 | 31.8 | 31.7 | 32.5 | 32.8 | 32.2 | 32.2 | 32.0 | 31.7 |
| F22        | T04b      | Stomach  | 33.2 | 33.1 | 33.6 | 33.3 | 33.4 | 33.3 | 34.7 | 34.3 | 33.1 | 33.0 | 33.3 | 34.0 | 33.4 | 33.7 | 33.8 | 33.7 | 33.9 | 33.7 | 33.7 | 33.4 |
| F22        | T05       | Thymus   | 31.1 | 31.5 | 33.4 | 33.3 | 32.2 | 33.1 | 33.4 | 33.6 | 32.5 | 31.8 | 30.6 | 31.6 | 32.7 | 32.4 | 32.1 | 32.9 | 32.8 | 32.5 | 32.2 | 31.8 |
| F22        | T06       | Liver    | 31.0 | 31.0 | 32.3 | 32.9 | 31.8 | 32.6 | 33.1 | 32.5 | 31.7 | 31.5 | 30.6 | 30.9 | 31.3 | 31.6 | 32.2 | 31.7 | 31.7 | 31.1 | 31.1 | 30.5 |
| F22        | T07       | HPT      | 31.9 | 33.1 | 33.5 | 32.7 | 33.2 | 33.1 | 34.0 | 33.4 | 32.6 | 32.3 | 32.4 | 32.6 | 36.3 | 35.5 | 32.9 | 33.3 | 35.4 | 34.6 | 33.6 | 32.4 |
| F22        | T08       | Gall     | 33.0 | 33.1 | 35.1 | 34.4 | 33.1 | 33.2 | 35.2 | 33.7 | 33.3 | 33.0 | 32.6 | 33.2 | 33.2 | 32.8 | 33.4 | 33.7 | 33.5 | 33.1 | 33.0 | 32.9 |
| F22        | T09       | Heart    | 30.9 | 32.0 | 33.8 | 33.0 | 31.9 | 32.5 | 33.4 | 33.3 | 31.9 | 31.0 | 30.8 | 31.4 | 31.6 | 32.0 | 32.2 | 33.2 | 32.6 | 33.1 | 33.8 | 30.6 |
| F22        | T10       | Kidney   | 30.2 | 31.5 | 32.3 | 33.1 | 32.2 | 32.6 | 33.0 | 32.6 | 30.7 | 30.9 | 29.7 | 30.1 | 30.5 | 31.5 | 31.8 | 32.5 | 32.0 | 31.3 | 30.3 | 30.0 |
| F22        | T11       | Duodenum | 32.2 | 32.1 | 34.0 | 33.9 | 33.0 | 33.5 | 34.7 | 33.4 | 32.3 | 32.0 | 31.5 | 33.3 | 33.0 | 32.5 | 32.5 | 32.3 | 33.1 | 32.3 | 33.0 | 32.5 |
| F22        | T12       | Bladder  | 31.9 | 33.8 | 35.1 | 33.6 | 33.9 | 34.3 | 37.8 | 36.5 | 33.5 | 32.0 | 30.7 | 31.8 | 32.9 | 32.2 | 32.8 | 32.5 | 33.5 | 32.4 | 32.4 | 31.1 |
| F24        | Hot water | None     | 33.3 | 33.4 | 33.6 | 32.8 | 33.4 | 32.5 | 33.5 | 33.2 | 33.5 | 32.9 | 33.7 | 33.8 | 34.0 | 32.9 | 33.7 | 32.8 | 33.6 | 33.2 | 33.7 | 33.2 |
| F24        | T01a      | Lung     | 33.2 | 34.7 | 33.6 | 33.6 | 34.0 | 33.0 | 34.1 | 34.6 | 33.9 | 32.7 | 33.4 | 33.6 | 34.0 | 33.8 | 34.2 | 33.9 | 33.8 | 33.6 | 33.6 | 32.8 |
| F24        | T01b      | Lung     | 33.6 | 33.6 | 33.6 | 33.3 | 33.8 | 33.6 | 33.4 | 34.0 | 34.3 | 33.6 | 33.1 | 33.9 | 33.8 | 33.8 | 34.2 | 34.0 | 34.0 | 33.9 | 34.3 | 33.4 |
| F24        | T02       | Spleen   | 32.1 | 32.8 | 33.9 | 34.5 | 32.4 | 33.2 | 35.1 | 34.8 | 32.9 | 32.7 | 33.1 | 34.0 | 33.9 | 34.1 | 33.6 | 34.1 | 34.0 | 33.8 | 33.6 | 32.5 |
| F24        | T03       | Colon    | 34.0 | 34.1 | 34.6 | 34.7 | 34.0 | 33.8 | 34.1 | 34.3 | 34.0 | 33.9 | 33.5 | 34.0 | 33.9 | 33.7 | 34.4 | 34.3 | 34.1 | 34.3 | 34.2 | 33.5 |
| F24        | T04a      | Stomach  | 33.9 | 34.3 | 34.3 | 34.7 | 34.3 | 34.2 | 34.2 | 35.0 | 34.2 | 33.5 | 33.4 | 34.0 | 33.9 | 34.0 | 33.8 | 34.4 | 34.1 | 34.1 | 34.1 | 33.0 |
| F24        | T04b      | Stomach  | 34.6 | 34.6 | 35.3 | 35.4 | 34.8 | 34.6 | 34.6 | 34.5 | 34.3 | 34.3 | 34.2 | 34.7 | 34.8 | 34.7 | 34.7 | 35.0 | 34.8 | 34.8 | 34.5 | 34.2 |
| F24        | T05       | Thymus   | 31.9 | 32.7 | 35.1 | 34.7 | 33.2 | 33.0 | 32.3 | 33.1 | 32.1 | 31.9 | 31.1 | 31.7 | 32.9 | 32.3 | 33.1 | 31.9 | 32.1 | 31.9 | 31.5 | 30.7 |
| F24        | T06       | Liver    | 33.3 | 33.8 | 34.0 | 34.3 | 34.0 | 32.7 | 33.8 | 33.9 | 33.8 | 32.8 | 33.5 | 34.2 | 34.1 | 33.9 | 34.1 | 33.6 | 34.2 | 33.9 | 33.7 | 33.1 |
| F24        | T07       | HPT      | 34.6 | 35.3 | 35.3 | 34.2 | 34.5 | 34.4 | 34.2 | 34.2 | 33.9 | 33.8 | 34.1 | 34.6 | 34.6 | 34.3 | 34.6 | 34.4 | 34.2 | 34.1 | 34.0 | 33.6 |
| F24        | T08       | Gall     | 34.1 | 35.0 | 35.2 | 34.2 | 34.9 | 34.7 | 34.3 | 35.3 | 35.3 | 33.9 | 34.2 | 34.7 | 34.6 | 34.3 | 34.8 | 34.6 | 34.5 | 34.6 | 34.4 | 34.4 |
| F24        | T09       | Heart    | 30.6 | 35.1 | 35.9 | 32.2 | 31.7 | 31.9 | 32.8 | 35.7 | 35.7 | 33.9 | 28.6 | 30.4 | 30.9 | 29.9 | 31.2 | 32.5 | 29.9 | 30.3 | 30.0 | 30.6 |
| F24        | T10       | Kidney   | 29.2 | 29.6 | 31.2 | 32.0 | 31.1 | 30.3 | 30.2 | 30.4 | 29.1 | 28.4 | 27.9 | 28.6 | 28.2 | 28.6 | 30.1 | 29.6 | 28.3 | 28.5 | 27.8 | 28.0 |
| F24        | T11       | Duodenum | 33.5 | 33.6 | 33.8 | 34.2 | 33.8 | 33.9 | 33.6 | 36.0 | 34.9 | 33.3 | 33.3 | 33.4 | 33.8 | 33.5 | 33.8 | 33.6 | 33.7 | 33.7 | 33.9 | 32.8 |
| F24        | T12       | Bladder  | 33.7 | 34.3 | 35.0 | 34.1 | 34.9 | 34.8 | 35.2 | 36.1 | 33.9 | 33.2 | 33.4 | 33.9 | 34.0 | 34.1 | 33.9 | 34.6 | 34.2 | 34.4 | 33.9 | 33.7 |
| F26        | Hot water | None     | 31.9 | 32.2 | 31.9 | 31.5 | 31.9 | 32.3 | 32.1 | 32.3 | 31.7 | 31.8 | 32.4 | 32.4 | 32.1 | 31.9 | 31.9 | 32.7 | 32.3 | 32.5 | 31.9 | 32.2 |
| F26        | T01a      | Lung     | 31.7 | 32.1 | 33.3 | 32.1 | 32.1 | 32.2 | 32.0 | 34.5 | 35.9 | 32.2 | 30.8 | 31.5 | 31.3 | 31.4 | 32.3 | 32.3 | 31.4 | 31.7 | 31.6 | 31.8 |
| F26        | T01b      | Lung     | 33.5 | 34.3 | 34.3 | 33.5 | 33.8 | 33.6 | 33.9 | 34.7 | 34.1 | 33.3 | 32.3 | 33.0 | 32.8 | 33.0 | 32.9 | 33.3 | 33.1 | 32.7 | 32.4 | 32.8 |
| F26        | T02       | Spleen   | 32.6 | 33.3 | 33.5 | 33.5 | 33.1 | 32.6 | 33.0 | 33.4 | 33.4 | 33.1 | 33.0 | 33.2 | 33.2 | 33.2 | 33.3 | 33.3 | 32.9 | 33.0 | 33.2 | 32.5 |
| F26        | T03       | Colon    | 34.1 | 34.0 | 34.3 | 34.5 | 34.2 | 34.0 | 33.9 | 34.1 | 34.1 | 34.2 | 33.6 | 33.6 | 33.9 | 33.9 | 34.0 | 33.6 | 33.9 | 34.1 | 34.3 | 34.1 |
| F26        | T04a      | Stomach  | 33.8 | 33.8 | 34.4 | 34.3 | 33.9 | 34.0 | 34.0 | 33.9 | 34.1 | 33.5 | 33.5 | 33.8 | 33.8 | 33.9 | 33.5 | 33.5 | 33.3 | 33.3 | 33.9 | 33.3 |
| F26        | T04b      | Stomach  | 34.7 | 35.2 | 34.6 | 34.3 | 34.4 | 34.2 | 34.3 | 35.1 | 36.2 | 34.2 | 34.1 | 34.5 | 34.5 | 34.6 | 34.2 | 34.0 | 34.2 | 34.2 | 34.4 | 34.4 |
| F26        | T05       | Thymus   | 33.6 | 34.6 | 35.8 | 35.5 | 33.8 | 33.6 | 34.2 | 35.4 | 34.4 | 33.6 | 32.6 | 33.3 | 33.3 | 33.2 | 33.4 | 33.3 | 33.1 | 33.1 | 33.4 | 32.8 |
| F26        | T07       | HPT      | 33.2 | 33.6 | 33.8 | 33.9 | 33.5 | 33.4 | 33.3 | 33.7 | 33.5 | 33.8 | 33.6 | 33.7 | 34.1 | 35.0 | 33.8 | 32.9 | 32.8 | 33.1 | 33.8 | 33.5 |
| F26        | T08       | Gall     | 34.0 | 34.5 | 34.5 | 35.8 | 34.0 | 34.1 | 34.3 | 34.5 | 34.5 | 34.1 | 33.7 | 33.8 | 33.5 | 34.2 | 33.2 | 33.8 | 33.7 | 33.3 | 34.3 | 34.1 |
| F26        | T09       | Heart    | 34.1 | 36.0 | 35.8 | 35.5 | 34.0 | 34.4 | 34.2 | 36.4 | 36.4 | 33.7 | 32.1 | 33.1 | 32.8 | 33.1 | 33.6 | 33.6 | 32.9 | 33.3 | 33.0 | 32.6 |
| F26        | T10       | Kidney   | 33.5 | 34.1 | 36.0 | 34.6 | 33.8 | 34.2 | 35.2 | 35.9 | 34.5 | 33.9 | 32.6 | 34.0 | 33.8 | 33.8 | 33.7 | 33.7 | 33.9 | 33.7 | 33.5 | 33.3 |
| F26        | T11       | Duodenum | 33.3 | 34.1 | 36.3 | 34.9 | 33.7 | 33.7 | 34.3 | 36.3 | 34.8 | 33.8 | 33.0 | 33.9 | 33.6 | 33.8 | 33.8 | 33.4 | 33.7 | 33.1 | 33.7 | 33.4 |
| F26        | T12       | Bladder  | 34.0 | 34.5 | 37.1 | 35.0 | 35.1 | 33.4 | 35.4 | 38.2 | 37.9 | 34.2 | 32.6 | 33.2 | 32.9 | 32.3 | 32.8 | 33.7 | 33.8 | 33.4 | 33.6 | 33.8 |
| F28        | Hot water | None     | 33.7 | 34.7 | 33.9 | 34.1 | 33.7 | 34.3 | 33.5 | 33.7 | 34.8 | 34.2 | 34.1 | 34.8 | 33.9 | 34.1 | 33.7 | 34.4 | 33.7 | 33.9 | 35.0 | 34.7 |
| F28        | T01a      | Lung     | 35.9 | 38.3 | 38.2 | 35.9 | 34.7 | 35.1 | 35.8 | 37.0 | 37.9 | 37.0 | 34.3 | 34.4 | 34.6 | 34.5 | 33.7 | 34.5 | 34.4 | 34.4 | 34.7 | 34.0 |
| F28        | T01b      | Lung     | 35.0 | 35.7 | 35.7 | 34.9 | 35.6 | 35.2 | 35.0 | 36.0 | 36.4 | 35.2 | 33.8 | 34.3 | 34.3 | 34.3 | 34.2 | 34.7 | 34.0 | 34.1 | 34.2 | 33.9 |
| F28        | T02       | Spleen   | 34.1 | 34.9 | 35.1 | 34.8 | 34.6 | 34.5 | 34.5 | 35.8 | 36.0 |      |      |      |      |      |      |      |      |      |      |      |

**Infrared imageries of human body activated by tea match the hypothesis of meridian system**

**(Supplementary Table 2 Continued)**

| Individual | Tea       | Meridian | VR5  | VR4  | VR3  | VR2  | VR1  | VL1  | VL2  | VL3  | VL4    | VL5  | DR5  | DR4  | DR3  | DR2  | DR1  | DL1  | DL2  | DL3  | DL4  | DL5  |
|------------|-----------|----------|------|------|------|------|------|------|------|------|--------|------|------|------|------|------|------|------|------|------|------|------|
| F32        | Hot water | None     | 34.0 | 34.6 | 34.0 | 34.8 | 34.2 | 33.7 | 34.5 | 34.4 | 34.5   | 34.2 | 34.1 | 34.9 | 34.1 | 35.0 | 34.6 | 34.2 | 34.6 | 35.0 | 35.0 | 34.4 |
| F32        | T01a      | Lung     | 33.7 | 34.0 | 34.3 | 34.1 | 34.2 | 34.1 | 36.2 | 36.7 | 36.9   | 34.0 | 33.7 | 34.2 | 33.6 | 33.9 | 34.1 | 33.7 | 34.3 | 34.0 | 34.5 | 33.7 |
| F32        | T01b      | Lung     | 34.8 | 35.4 | 36.2 | 35.7 | 34.8 | 35.2 | 37.2 | 36.9 | 36.1   | 34.8 | 34.2 | 34.3 | 34.6 | 34.5 | 34.7 | 34.2 | 34.5 | 34.2 | 34.6 | 34.3 |
| F32        | T02       | Spleen   | 33.7 | 35.4 | 35.6 | 35.3 | 34.9 | 34.5 | 37.7 | 36.7 | 35.2   | 33.4 | 33.1 | 33.3 | 33.3 | 33.2 | 33.8 | 33.3 | 34.0 | 33.4 | 33.6 | 33.1 |
| F32        | T03       | Colon    | 33.8 | 33.9 | 34.1 | 34.3 | 34.2 | 34.5 | 35.0 | 35.6 | 34.9   | 34.2 | 34.1 | 34.1 | 34.2 | 34.1 | 34.3 | 34.2 | 34.4 | 34.0 | 33.9 | 33.5 |
| F32        | T04a      | Stomach  | 34.3 | 34.3 | 34.9 | 34.7 | 34.8 | 34.7 | 36.5 | 35.7 | 34.4   | 34.2 | 33.7 | 34.1 | 34.3 | 34.3 | 34.6 | 34.2 | 34.4 | 34.3 | 34.7 | 33.9 |
| F32        | T06       | Liver    | 31.8 | 32.5 | 34.3 | 33.3 | 32.6 | 32.7 | 34.0 | 33.8 | 33.4   | 32.3 | 31.3 | 31.9 | 32.4 | 31.8 | 33.1 | 32.4 | 32.6 | 31.7 | 31.5 | 31.6 |
| F32        | T07       | HPT      | 34.6 | 34.5 | 34.3 | 34.6 | 34.4 | 34.7 | 36.6 | 36.6 | 34.8   | 34.6 | 34.1 | 34.1 | 33.7 | 34.4 | 34.2 | 34.4 | 34.2 | 34.4 | 34.4 | 34.5 |
| F32        | T08       | Gall     | 34.2 | 34.3 | 34.5 | 34.5 | 34.1 | 34.4 | 34.9 | 33.8 | 33.9   | 33.6 | 33.9 | 34.1 | 33.9 | 34.4 | 34.6 | 34.1 | 34.2 | 33.9 | 34.1 | 33.8 |
| F32        | T09       | Heart    | 34.2 | 35.4 | 35.9 | 35.1 | 34.8 | 34.2 | 36.2 | 34.8 | 34.4   | 35.1 | 33.2 | 34.2 | 34.2 | 34.2 | 35.0 | 33.8 | 34.5 | 34.0 | 33.9 | 34.3 |
| F32        | T10       | Kidney   | 34.1 | 34.6 | 35.6 | 34.8 | 34.9 | 34.8 | 35.8 | 35.6 | 35.3   | 34.9 | 33.1 | 33.7 | 34.2 | 33.8 | 34.7 | 34.0 | 34.5 | 34.1 | 33.8 | 33.8 |
| F34        | Hot water | None     | 34.1 | 34.4 | 33.6 | 34.2 | 34.6 | 34.0 | 35.1 | 34.0 | 34.4   | 33.6 | 34.7 | 34.4 | 34.1 | 34.6 | 35.1 | 34.4 | 35.3 | 34.6 | 34.8 | 34.0 |
| F34        | T01a      | Lung     | 35.6 | 34.8 | 36.3 | 36.4 | 34.6 | 35.3 | 34.9 | 35.3 | 34.6   | 34.4 | 34.2 | 34.6 | 34.4 | 34.4 | 34.5 | 34.3 | 34.2 | 34.5 | 34.3 | 33.8 |
| F34        | T01b      | Lung     | 36.1 | 37.4 | 38.0 | 35.6 | 34.6 | 34.7 | 34.7 | 34.5 | 34.9   | 34.9 | 34.8 | 35.1 | 34.8 | 35.2 | 34.4 | 34.5 | 34.4 | 34.0 | 34.3 | 34.0 |
| F34        | T02       | Spleen   | 34.3 | 34.4 | 34.4 | 34.2 | 34.8 | 34.6 | 34.4 | 34.3 | 34.5   | 34.4 | 34.8 | 34.7 | 34.8 | 34.7 | 34.3 | 34.7 | 34.4 | 34.6 | 34.8 | 34.6 |
| F34        | T03       | Colon    | 34.3 | 34.6 | 35.0 | 35.5 | 34.1 | 34.6 | 34.6 | 35.2 | 34.2   | 34.4 | 34.3 | 34.2 | 33.9 | 34.2 | 34.1 | 34.1 | 34.3 | 34.3 | 34.2 | 34.2 |
| F34        | T04a      | Stomach  | 34.9 | 35.6 | 35.9 | 35.4 | 35.0 | 34.3 | 35.5 | 35.6 | 35.0   | 34.6 | 33.7 | 34.4 | 34.3 | 34.2 | 34.2 | 34.1 | 34.2 | 34.1 | 34.2 | 33.9 |
| F34        | T04b      | Stomach  | 34.8 | 35.2 | 35.9 | 35.7 | 34.9 | 34.6 | 35.1 | 34.3 | 34.4   | 34.7 | 34.6 | 34.8 | 34.6 | 34.8 | 34.1 | 34.2 | 34.6 | 34.4 | 34.4 | 34.3 |
| F34        | T05       | Thymus   | 34.2 | 35.3 | 34.5 | 34.9 | 34.6 | 34.3 | 34.8 | 35.1 | 34.6   | 33.9 | 34.7 | 34.4 | 34.1 | 34.6 | 34.5 | 34.3 | 34.3 | 34.3 | 34.0 | 33.8 |
| F34        | T06       | Liver    | 33.8 | 33.9 | 33.8 | 33.8 | 34.2 | 34.5 | 33.8 | 33.9 | 34.0   | 33.7 | 33.1 | 33.3 | 33.2 | 33.5 | 33.6 | 33.9 | 33.7 | 33.2 | 33.1 | 33.0 |
| F34        | T07       | HPT      | 35.0 | 36.9 | 35.0 | 35.7 | 34.8 | 35.2 | 34.9 | 34.6 | 34.8   | 34.8 | 35.1 | 34.6 | 34.2 | 34.5 | 34.5 | 34.9 | 34.5 | 34.6 | 34.4 | 34.4 |
| F34        | T08       | Gall     | 33.5 | 33.6 | 33.4 | 33.5 | 33.8 | 33.5 | 33.3 | 33.5 | 33.6   | 33.5 | 34.4 | 34.4 | 34.5 | 34.7 | 34.5 | 33.8 | 33.9 | 34.2 | 34.4 | 34.0 |
| F34        | T09       | Heart    | 34.0 | 34.1 | 34.1 | 33.4 | 34.2 | 33.9 | 34.3 | 34.3 | 34.1   | 33.6 | 33.9 | 34.4 | 34.3 | 34.7 | 34.3 | 34.4 | 34.2 | 34.1 | 34.1 | 33.6 |
| F34        | T10       | Kidney   | 33.1 | 33.9 | 35.4 | 35.2 | 33.9 | 33.6 | 34.7 | 35.1 | 33.9   | 33.3 | 33.6 | 33.8 | 33.5 | 34.0 | 33.9 | 34.1 | 33.7 | 33.8 | 34.1 | 33.4 |
| F34        | T11       | Duodenum | 34.4 | 36.0 | 35.5 | 36.1 | 34.4 | 34.4 | 34.6 | 37.3 | 36.2   | 34.6 | 33.9 | 34.5 | 34.7 | 35.0 | 34.1 | 33.9 | 34.1 | 35.0 | 34.6 | 34.4 |
| F34        | T12       | Bladder  | 34.8 | 34.8 | 34.8 | 35.1 | 34.4 | 34.9 | 34.8 | 34.9 | 34.9   | 34.7 | 34.4 | 34.4 | 34.6 | 34.6 | 34.0 | 34.4 | 34.2 | 34.1 | 34.4 | 34.2 |
| F36        | Hot water | None     | 33.6 | 33.6 | 33.7 | 34.0 | 33.9 | 33.8 | 33.9 | 33.9 | 34.3   | 33.7 | 33.8 | 33.9 | 34.2 | 34.2 | 34.5 | 34.1 | 34.4 | 34.3 | 34.8 | 34.2 |
| F36        | T01a      | Lung     | 33.2 | 33.6 | 33.9 | 33.2 | 33.9 | 32.7 | 33.9 | 33.9 | 33.4   | 33.3 | 33.2 | 34.0 | 33.6 | 33.3 | 33.8 | 33.5 | 32.8 | 33.5 | 33.3 | 33.1 |
| F36        | T01b      | Lung     | 34.4 | 34.7 | 34.8 | 34.6 | 35.4 | 35.4 | 35.1 | 35.0 | 34.4   | 34.2 | 33.2 | 33.7 | 33.5 | 33.3 | 33.5 | 33.3 | 32.8 | 33.5 | 33.6 | 33.0 |
| F36        | T02       | Spleen   | 32.3 | 32.6 | 34.1 | 33.4 | 32.4 | 32.0 | 34.1 | 33.7 | 32.2   | 31.9 | 32.3 | 32.8 | 32.6 | 32.1 | 32.8 | 32.8 | 32.3 | 32.4 | 32.2 | 32.3 |
| F36        | T03       | Colon    | 33.4 | 33.6 | 34.6 | 35.2 | 32.9 | 33.4 | 32.4 | 33.5 | 33.3   | 33.4 | 32.0 | 33.7 | 32.7 | 32.0 | 32.3 | 33.2 | 31.5 | 32.0 | 32.4 | 33.1 |
| F36        | T04a      | Stomach  | 33.4 | 34.2 | 34.6 | 34.2 | 34.2 | 33.7 | 35.5 | 35.1 | 34.8   | 33.9 | 33.0 | 34.1 | 33.5 | 33.6 | 33.4 | 33.7 | 33.1 | 33.1 | 33.1 | 32.6 |
| F36        | T04b      | Stomach  | 34.8 | 34.8 | 35.4 | 35.6 | 34.4 | 34.4 | 35.0 | 35.6 | 35.2   | 34.7 | 34.4 | 34.6 | 34.9 | 34.4 | 34.3 | 34.8 | 34.4 | 34.4 | 34.6 | 33.8 |
| F36        | T05       | Thymus   | 32.7 | 33.1 | 33.7 | 35.0 | 32.8 | 33.1 | 35.5 | 35.5 | 34.7   | 32.5 | 32.3 | 32.3 | 32.1 | 32.1 | 33.0 | 33.0 | 32.1 | 32.3 | 32.4 | 32.3 |
| F36        | T06       | Liver    | 31.9 | 32.4 | 32.3 | 33.1 | 33.3 | 33.4 | 33.0 | 33.3 | 33.3   | 32.9 | 31.8 | 32.1 | 32.0 | 31.8 | 33.1 | 33.0 | 32.6 | 32.6 | 32.6 | 32.6 |
| F36        | T07       | HPT      | 32.5 | 33.7 | 35.4 | 35.7 | 33.0 | 33.3 | 33.6 | 34.2 | 34.7   | 33.0 | 32.4 | 33.0 | 33.1 | 33.0 | 32.8 | 33.2 | 32.7 | 32.8 | 32.5 | 32.8 |
| F36        | T08       | Gall     | 34.4 | 34.6 | 34.5 | 34.5 | 34.4 | 34.6 | 35.7 | 35.0 | 34.6   | 34.2 | 34.3 | 34.7 | 33.8 | 34.2 | 33.9 | 34.1 | 34.1 | 34.2 | 34.3 | 34.0 |
| F36        | T09       | Heart    | 32.1 | 34.3 | 35.0 | 35.6 | 33.3 | 32.4 | 34.6 | 35.0 | 33.5   | 32.6 | 31.5 | 32.7 | 32.3 | 32.6 | 33.8 | 32.6 | 32.6 | 31.9 | 30.8 | 31.2 |
| F36        | T10       | Kidney   | 32.2 | 33.8 | 34.3 | 33.7 | 32.6 | 33.0 | 34.5 | 34.4 | 34.7   | 32.8 | 30.8 | 30.7 | 30.8 | 31.1 | 32.0 | 32.2 | 30.8 | 30.7 | 31.0 | 30.0 |
| F36        | T11       | Duodenum | 32.8 | 35.8 | 36.4 | 34.9 | 32.6 | 33.5 | 35.6 | 36.7 | 35.8   | 32.8 | 31.9 | 33.3 | 33.5 | 33.0 | 33.5 | 34.0 | 33.2 | 33.2 | 33.1 | 32.5 |
| F36        | T12       | Bladder  | 34.5 | 35.6 | 36.2 | 36.2 | 35.1 | 34.8 | 37.1 | 35.4 | 35.5   | 34.4 | 34.5 | 34.6 | 34.7 | 34.1 | 34.2 | 34.2 | 34.5 | 34.6 | 34.6 | 33.8 |
| F38        | Hot water | None     | 33.8 | 34.1 | 34.1 | 33.6 | 33.8 | 34.4 | 34.5 | 33.5 | 33.4   | 33.7 | 34.1 | 34.5 | 34.5 | 33.8 | 33.8 | 34.7 | 34.6 | 33.7 | 33.9 | 33.8 |
| F38        | T01a      | Lung     | 35.1 | 36.6 | 37.2 | 36.7 | 34.4 | 35.5 | 36.7 | 37.3 | 37.4   | 34.8 | 34.3 | 34.6 | 34.4 | 34.9 | 34.6 | 34.9 | 34.4 | 34.5 | 34.5 | 33.8 |
| F38        | T01b      | Lung     | 33.8 | 34.9 | 35.2 | 34.2 | 34.4 | 34.1 | 34.4 | 35.8 | 34.8   | 34.2 | 33.7 | 33.9 | 33.8 | 33.6 | 33.6 | 33.8 | 33.4 | 33.6 | 33.3 | 33.1 |
| F38        | T02       | Spleen   | 34.1 | 35.1 | 35.1 | 34.8 | 34.7 | 34.2 | 34.2 | 34.0 | 34.9   | 33.8 | 32.8 | 32.7 | 33.4 | 33.4 | 33.6 | 33.2 | 33.1 | 33.2 | 32.5 | 31.9 |
| F38        | T03       | Colon    | 33.9 | 34.4 | 35.3 | 34.7 | 34.2 | 34.5 | 35.7 | 35.7 | 35.7   | 34.1 | 33.8 | 34.3 | 34.4 | 34.4 | 34.4 | 34.4 | 34.2 | 34.2 | 34.2 | 33.8 |
| F38        | T04a      | Stomach  | 33.7 | 34.0 | 34.1 | 34.4 | 34.1 | 34.2 | 34.2 | 34.1 | 34.2   | 34.0 | 33.3 | 33.2 | 33.3 | 33.7 | 33.9 | 33.3 | 33.5 | 33.6 | 33.6 | 32.9 |
| F38        | T04b      | Stomach  | 33.2 | 34.0 | 33.9 | 34.3 | 33.8 | 33.8 | 34.7 | 35.7 | 34.0   | 33.4 | 34.0 | 34.1 | 34.0 | 34.0 | 34.0 | 33.9 | 34.0 | 33.6 | 33.8 | 34.0 |
| F38        | T05       | Thymus   | 32.7 | 32.8 | 33.5 | 33.7 | 32.7 | 33.8 | 34.8 | 35.4 | 33.2   | 32.6 | 32.2 | 32.6 | 32.6 | 32.9 | 33.5 | 33.6 | 32.5 | 32.5 | 32.0 | 32.2 |
| F38        | T06       | Liver    | 32.9 | 33.3 | 33.6 | 33.5 | 34.0 | 34.0 | 33.6 | 33.6 | 33.9   | 32.9 | 33.9 | 33.9 | 34.3 | 34.1 | 34.5 | 34.2 | 33.9 | 34.0 | 33.5 | 33.4 |
| F38        | T07       | HPT      | 35.1 | 36.1 | 36.1 | 35.4 | 34.6 | 35.5 | 36.2 | 37.2 | 36.9   | 35.4 | 35.1 | 35.2 | 35.3 | 34.8 | 35.2 | 35.2 | 34.6 | 34.9 | 34.8 | 35.0 |
| F38        | T08       | Gall     | 34.2 | 34.5 | 34.8 | 34.7 | 34.3 | 34.8 | 36.0 | 36.4 | 35.4   | 33.9 | 34.4 | 34.6 | 34.8 | 34.6 | 34.9 | 34.8 | 34.4 | 34.3 | 34.4 | 34.0 |
| F38        | T09       | Heart    | 28.2 | 29.5 | 31.4 | 31.8 | 30.4 | 30.6 | 31.5 | 32.0 | 31.2   | 28.5 | 27.1 | 27.6 | 28.1 | 28.0 | 29.7 | 29.5 | 28.6 | 28.4 | 28.3 | 27.2 |
| F38        | T10       | Kidney   | 32.2 | 35.1 | 36.1 | 36.1 | 33.1 | 34.2 | 35.8 | 35.7 | 35.2   | 31.4 | 31.7 | 32.1 | 33.0 | 32.4 | 33.3 | 32.1 | 32.5 | 32.8 | 31.5 | 30.3 |
| F38        | T11       | Duodenum | 34.5 | 35.7 | 35.5 | 34.3 | 34.6 | 34.8 | 34.7 | 34.9 | 34.3   | 34.2 | 34.0 | 34.2 | 34.2 | 34.3 | 34.3 | 34.5 | 34.0 | 34.2 | 34.1 | 33.7 |
| F38        | T12       | Bladder  | 33.8 | 35.2 | 36.7 | 36.7 | 34.8 | 34.0 | 34.6 | 35.3 | 35.3   | 34.4 | 34.4 | 34.8 | 34.5 | 34.7 | 34.5 | 34.9 | 34.7 | 34.7 | 34.5 | 34.3 |
| F40        | Hot water | None     | 34.4 | 34.4 | 33.9 | 34.0 | 34.3 | 33.9 | 34.4 | 34.0 | 34.7   | 34.5 | 34.4 | 34.5 | 34.4 | 34.2 | 34.7 | 33.9 | 34.8 | 34.0 | 35.3 | 34.6 |
| F40        | T01a      | Lung     | 33.9 | 33.9 | 33.8 | 33.8 | 34.1 | 33.8 | 34.0 | 33.9 | 34.0   | 33.7 | 34.2 | 34.1 | 34.4 | 33.9 | 34.6 | 34.4 | 34.6 | 34.5 | 34.3 | 34.1 |
| F40        | T01b      | Lung     | 34.2 | 34.1 | 35.0 | 34.8 | 34.3 | 34.2 | 34.3 | 35.2 | 34.6</ |      |      |      |      |      |      |      |      |      |      |      |

Infrared imageries of human body activated by tea match the hypothesis of meridian system

(Supplementary Table 2 Continued)

| Individual | Tea       | Meridian | VR5  | VR4  | VR3  | VR2  | VR1  | VL1  | VL2  | VL3  | VL4  | VL5  | DR5  | DR4  | DR3  | DR2  | DR1  | DL1  | DL2  | DL3  | DL4  | DL5  |
|------------|-----------|----------|------|------|------|------|------|------|------|------|------|------|------|------|------|------|------|------|------|------|------|------|
| F42        | Hot water | None     | 34.5 | 35.1 | 34.1 | 34.5 | 34.5 | 33.8 | 34.5 | 34.2 | 33.9 | 33.6 | 33.6 | 34.2 | 34.1 | 34.1 | 34.1 | 33.7 | 34.1 | 34.0 | 34.8 | 34.2 |
| F42        | T01a      | Lung     | 34.3 | 34.4 | 34.4 | 33.8 | 33.6 | 34.1 | 33.9 | 34.2 | 33.9 | 33.6 | 33.6 | 34.2 | 34.1 | 34.1 | 34.1 | 33.7 | 34.1 | 34.0 | 33.9 | 33.6 |
| F42        | T01b      | Lung     | 35.0 | 35.2 | 36.1 | 35.5 | 35.1 | 35.1 | 35.7 | 36.4 | 36.3 | 35.2 | 34.8 | 35.0 | 35.1 | 34.7 | 34.6 | 35.3 | 34.9 | 35.0 | 34.9 | 34.4 |
| F42        | T02       | Spleen   | 34.4 | 34.5 | 34.6 | 34.6 | 34.6 | 34.8 | 34.9 | 34.9 | 34.8 | 34.4 | 34.2 | 34.8 | 34.6 | 34.5 | 34.5 | 34.4 | 34.2 | 34.5 | 34.3 | 34.0 |
| F42        | T03       | Colon    | 34.4 | 34.3 | 34.4 | 34.5 | 34.4 | 34.7 | 34.8 | 34.6 | 34.6 | 34.8 | 33.8 | 34.6 | 34.5 | 34.4 | 34.2 | 34.1 | 34.2 | 34.1 | 34.1 | 33.9 |
| F42        | T04a      | Stomach  | 35.0 | 35.1 | 35.3 | 35.2 | 35.1 | 35.4 | 35.2 | 35.3 | 35.4 | 35.2 | 34.7 | 35.0 | 34.8 | 34.8 | 35.1 | 35.1 | 35.1 | 35.3 | 35.4 | 34.9 |
| F42        | T04b      | Stomach  | 35.1 | 35.0 | 35.3 | 35.4 | 35.4 | 35.3 | 35.2 | 35.4 | 35.0 | 35.1 | 35.0 | 35.2 | 35.2 | 34.9 | 35.0 | 35.4 | 35.2 | 35.2 | 35.5 | 34.9 |
| F42        | T05       | Thymus   | 34.5 | 34.8 | 35.1 | 35.1 | 35.1 | 35.4 | 35.4 | 37.4 | 35.8 | 34.4 | 34.0 | 34.6 | 34.7 | 34.5 | 34.6 | 34.4 | 34.5 | 34.4 | 34.4 | 33.8 |
| F42        | T06       | Liver    | 34.4 | 34.6 | 34.9 | 34.7 | 34.8 | 34.9 | 35.3 | 35.0 | 34.8 | 35.2 | 34.5 | 34.9 | 35.0 | 34.8 | 34.9 | 34.9 | 34.8 | 34.8 | 34.8 | 34.6 |
| F42        | T07       | HPT      | 35.4 | 35.2 | 35.4 | 35.2 | 35.0 | 35.5 | 36.2 | 35.8 | 35.4 | 35.4 | 34.9 | 35.1 | 34.8 | 34.8 | 34.9 | 35.2 | 35.0 | 35.1 | 35.1 | 34.5 |
| F42        | T08       | Gall     | 35.0 | 35.3 | 35.3 | 35.4 | 35.5 | 35.3 | 35.7 | 35.5 | 35.4 | 35.5 | 34.9 | 35.3 | 35.2 | 35.1 | 35.1 | 35.0 | 35.0 | 34.8 | 34.8 | 34.4 |
| F42        | T09       | Heart    | 33.4 | 33.6 | 33.6 | 33.8 | 34.0 | 33.8 | 34.2 | 34.1 | 33.6 | 32.5 | 32.7 | 33.4 | 33.4 | 33.5 | 33.5 | 33.5 | 33.7 | 33.3 | 33.4 | 33.0 |
| F42        | T10       | Kidney   | 33.9 | 34.3 | 34.4 | 34.4 | 34.2 | 34.4 | 34.2 | 34.0 | 34.1 | 33.8 | 33.9 | 34.2 | 34.2 | 34.3 | 34.5 | 34.5 | 34.3 | 34.0 | 34.3 | 33.7 |
| F42        | T11       | Duodenum | 34.3 | 34.3 | 34.4 | 34.5 | 34.3 | 34.6 | 34.9 | 34.4 | 34.5 | 34.5 | 33.8 | 34.2 | 34.2 | 34.1 | 34.1 | 34.4 | 34.4 | 33.8 | 34.0 | 33.6 |
| F42        | T12       | Bladder  | 34.3 | 34.6 | 35.5 | 35.0 | 34.8 | 34.6 | 35.2 | 35.6 | 34.7 | 34.4 | 34.1 | 34.2 | 34.3 | 34.2 | 34.8 | 34.6 | 34.3 | 34.2 | 34.2 | 34.0 |
| F44        | Hot water | None     | 32.0 | 32.1 | 32.8 | 32.9 | 33.2 | 33.3 | 32.5 | 33.1 | 33.0 | 32.0 | 32.4 | 32.5 | 32.9 | 32.9 | 33.4 | 33.4 | 32.9 | 33.1 | 33.5 | 32.6 |
| F44        | T01a      | Lung     | 32.4 | 33.3 | 35.5 | 34.7 | 33.4 | 32.7 | 33.6 | 33.2 | 32.8 | 32.2 | 32.8 | 33.1 | 33.0 | 33.0 | 32.9 | 32.9 | 32.7 | 32.8 | 32.6 | 32.4 |
| F44        | T01b      | Lung     | 33.8 | 34.4 | 35.9 | 35.0 | 34.3 | 34.2 | 36.1 | 37.3 | 34.5 | 34.1 | 33.8 | 34.4 | 34.3 | 34.0 | 33.8 | 33.9 | 33.6 | 33.7 | 34.1 | 33.6 |
| F44        | T02       | Spleen   | 33.3 | 34.0 | 35.0 | 34.0 | 33.6 | 32.9 | 34.2 | 34.2 | 32.8 | 32.6 | 33.2 | 34.0 | 33.7 | 33.6 | 33.6 | 32.7 | 33.0 | 33.1 | 32.8 | 32.6 |
| F44        | T03       | Colon    | 33.1 | 33.5 | 33.9 | 33.8 | 33.9 | 33.6 | 33.8 | 33.6 | 33.2 | 32.5 | 33.1 | 33.6 | 33.9 | 33.5 | 33.4 | 33.6 | 33.4 | 33.6 | 33.6 | 32.6 |
| F44        | T04a      | Stomach  | 32.9 | 33.2 | 34.6 | 33.4 | 33.5 | 33.5 | 34.0 | 33.9 | 33.5 | 32.9 | 32.6 | 33.3 | 32.9 | 32.8 | 33.5 | 33.4 | 33.1 | 32.8 | 33.2 | 33.0 |
| F44        | T04b      | Stomach  | 32.8 | 33.8 | 35.0 | 34.1 | 33.6 | 33.8 | 33.3 | 34.6 | 32.9 | 33.0 | 33.1 | 33.8 | 33.2 | 33.2 | 33.5 | 33.7 | 32.4 | 32.9 | 33.1 | 33.2 |
| F44        | T05       | Thymus   | 32.7 | 33.5 | 34.5 | 34.0 | 33.7 | 33.6 | 34.5 | 34.7 | 33.5 | 33.2 | 31.9 | 32.9 | 32.9 | 32.8 | 33.8 | 33.2 | 32.4 | 32.4 | 32.5 | 32.3 |
| F44        | T06       | Liver    | 33.2 | 33.9 | 35.9 | 35.4 | 34.4 | 34.3 | 35.3 | 34.9 | 33.8 | 32.9 | 33.3 | 34.0 | 33.4 | 33.3 | 33.7 | 33.7 | 32.8 | 33.3 | 33.3 | 32.3 |
| F44        | T07       | HPT      | 33.4 | 34.1 | 34.8 | 34.3 | 33.9 | 33.8 | 33.5 | 33.6 | 33.5 | 33.7 | 33.4 | 33.5 | 33.9 | 33.9 | 33.9 | 33.5 | 33.3 | 33.3 | 33.3 | 33.1 |
| F44        | T08       | Gall     | 33.5 | 34.1 | 36.8 | 35.9 | 35.8 | 33.8 | 34.2 | 36.2 | 35.5 | 34.9 | 33.2 | 34.2 | 34.3 | 34.1 | 33.8 | 33.4 | 33.5 | 33.5 | 33.3 | 32.7 |
| F44        | T09       | Heart    | 33.4 | 34.1 | 34.4 | 34.2 | 34.4 | 33.9 | 34.0 | 33.3 | 33.7 | 33.1 | 33.4 | 33.7 | 34.2 | 33.8 | 34.1 | 33.7 | 33.9 | 33.4 | 33.6 | 33.1 |
| F44        | T10       | Kidney   | 33.4 | 33.7 | 35.5 | 34.7 | 33.8 | 33.5 | 34.1 | 34.9 | 33.3 | 33.1 | 32.8 | 33.3 | 33.7 | 33.3 | 33.6 | 33.5 | 32.8 | 33.0 | 33.5 | 33.0 |
| F44        | T11       | Duodenum | 32.9 | 33.3 | 35.5 | 33.8 | 33.1 | 33.4 | 33.6 | 34.2 | 33.3 | 32.9 | 33.0 | 33.4 | 33.4 | 33.1 | 33.5 | 33.4 | 33.5 | 33.4 | 33.3 | 33.0 |
| F44        | T12       | Bladder  | 34.2 | 35.7 | 35.7 | 35.2 | 34.5 | 34.4 | 35.5 | 35.2 | 34.9 | 34.7 | 34.1 | 34.5 | 34.5 | 34.3 | 34.3 | 34.1 | 34.3 | 33.9 | 34.2 | 34.1 |
| F46        | T01a      | Lung     | 32.6 | 32.7 | 33.2 | 33.6 | 33.3 | 33.1 | 33.3 | 33.0 | 32.4 | 32.2 | 32.2 | 32.6 | 32.8 | 33.1 | 33.6 | 32.8 | 33.1 | 32.9 | 32.6 | 32.4 |
| F46        | T01b      | Lung     | 33.3 | 33.8 | 34.8 | 36.9 | 33.3 | 34.2 | 35.7 | 34.3 | 33.4 | 33.3 | 33.1 | 33.9 | 33.7 | 34.3 | 34.0 | 34.0 | 33.6 | 33.6 | 33.2 | 32.7 |
| F46        | T02       | Spleen   | 32.0 | 32.7 | 33.9 | 34.7 | 33.5 | 34.1 | 33.2 | 34.4 | 33.4 | 32.4 | 31.0 | 32.7 | 32.6 | 33.0 | 33.1 | 32.7 | 32.6 | 32.8 | 32.5 | 31.4 |
| F46        | T09       | Heart    | 31.7 | 32.7 | 35.0 | 35.4 | 35.0 | 33.8 | 35.0 | 35.9 | 34.2 | 32.6 | 32.6 | 33.6 | 33.7 | 34.0 | 34.1 | 33.6 | 33.5 | 33.3 | 33.3 | 31.9 |
| F46        | T10       | Kidney   | 33.1 | 33.7 | 34.6 | 35.0 | 33.2 | 33.4 | 34.2 | 34.8 | 34.5 | 32.8 | 33.3 | 33.5 | 33.5 | 33.6 | 33.9 | 33.5 | 33.3 | 33.6 | 32.9 | 32.6 |
| F48        | Hot water | None     | 34.6 | 35.1 | 35.7 | 34.5 | 34.9 | 34.6 | 35.1 | 35.5 | 35.2 | 35.0 | 34.8 | 35.6 | 36.3 | 34.7 | 35.5 | 34.6 | 35.4 | 36.1 | 35.2 | 35.3 |
| F48        | T01b      | Lung     | 35.0 | 36.2 | 36.5 | 35.4 | 35.8 | 35.4 | 35.4 | 35.4 | 36.5 | 35.6 | 34.8 | 35.1 | 34.9 | 35.0 | 35.0 | 35.0 | 34.6 | 35.0 | 35.2 | 34.4 |
| F48        | T02       | Spleen   | 33.8 | 36.6 | 36.3 | 35.9 | 35.1 | 34.6 | 34.8 | 34.8 | 35.7 | 34.1 | 32.9 | 34.1 | 34.4 | 33.8 | 34.7 | 33.8 | 33.2 | 33.3 | 33.9 | 33.1 |
| F48        | T03       | Colon    | 33.6 | 33.9 | 33.8 | 34.5 | 34.2 | 34.2 | 33.8 | 34.1 | 33.4 | 33.3 | 32.8 | 33.6 | 33.6 | 33.6 | 33.8 | 33.4 | 33.1 | 33.4 | 33.4 | 32.8 |
| F48        | T04a      | Stomach  | 34.2 | 34.7 | 34.4 | 34.0 | 34.5 | 34.4 | 34.1 | 34.6 | 34.3 | 34.1 | 33.4 | 34.1 | 34.1 | 34.0 | 34.0 | 34.2 | 33.7 | 34.0 | 33.8 | 33.1 |
| F48        | T04b      | Stomach  | 34.8 | 35.3 | 35.7 | 35.0 | 35.8 | 35.5 | 35.2 | 35.2 | 35.6 | 34.6 | 34.8 | 34.9 | 34.7 | 34.9 | 35.4 | 35.3 | 34.3 | 34.8 | 34.9 | 34.7 |
| F48        | T05       | Thymus   | 32.9 | 33.0 | 33.2 | 34.4 | 34.2 | 34.0 | 34.0 | 33.5 | 32.9 | 32.8 | 31.7 | 31.9 | 32.4 | 33.1 | 34.0 | 33.5 | 32.6 | 32.8 | 32.3 | 32.0 |
| F48        | T06       | Liver    | 34.9 | 34.9 | 36.1 | 35.6 | 34.9 | 35.7 | 35.7 | 35.0 | 35.4 | 35.0 | 33.8 | 34.5 | 34.9 | 34.7 | 35.0 | 34.8 | 34.4 | 34.3 | 34.6 | 33.6 |
| F48        | T07       | HPT      | 35.2 | 35.8 | 35.5 | 34.7 | 35.2 | 35.0 | 35.1 | 35.3 | 35.2 | 34.8 | 34.5 | 34.7 | 34.2 | 34.4 | 35.0 | 34.6 | 34.3 | 34.5 | 34.4 | 33.9 |
| F48        | T08       | Gall     | 34.7 | 35.0 | 34.8 | 34.7 | 35.7 | 35.5 | 35.5 | 36.2 | 35.2 | 34.6 | 34.1 | 34.8 | 34.9 | 34.8 | 34.9 | 35.0 | 34.1 | 34.7 | 34.8 | 34.4 |
| F48        | T09       | Heart    | 33.0 | 33.3 | 34.1 | 33.9 | 33.6 | 33.8 | 33.8 | 33.9 | 33.4 | 32.8 | 33.9 | 34.1 | 34.2 | 34.1 | 34.7 | 34.7 | 34.1 | 34.0 | 34.3 | 33.6 |
| F48        | T10       | Kidney   | 30.3 | 31.3 | 33.0 | 33.0 | 32.4 | 33.0 | 33.4 | 33.7 | 31.4 | 31.1 | 29.1 | 29.7 | 30.0 | 30.7 | 32.0 | 31.8 | 30.6 | 30.8 | 30.1 | 29.3 |
| F48        | T11       | Duodenum | 34.1 | 34.9 | 34.8 | 34.9 | 34.4 | 34.7 | 34.6 | 35.2 | 36.0 | 34.1 | 33.5 | 34.1 | 34.1 | 34.1 | 34.4 | 34.1 | 33.2 | 33.6 | 33.7 | 33.6 |
| F48        | T12       | Bladder  | 35.1 | 37.1 | 36.9 | 36.3 | 35.3 | 34.7 | 34.7 | 36.8 | 37.2 | 34.1 | 33.9 | 34.3 | 34.8 | 34.3 | 35.1 | 34.9 | 34.0 | 34.2 | 34.1 | 33.2 |
| F50        | T03       | Colon    | 32.8 | 32.8 | 34.6 | 33.8 | 32.9 | 33.1 | 33.0 | 33.3 | 33.1 | 33.0 | 31.9 | 32.4 | 32.3 | 32.6 | 33.6 | 33.2 | 32.3 | 32.7 | 32.4 | 32.1 |
| F50        | T04a      | Stomach  | 31.7 | 33.2 | 33.3 | 33.1 | 31.9 | 32.0 | 32.1 | 32.3 | 32.1 | 31.6 | 31.2 | 30.9 | 31.2 | 31.3 | 31.9 | 31.1 | 31.4 | 31.7 | 31.2 | 31.0 |
| F50        | T04b      | Stomach  | 34.1 | 34.6 | 34.7 | 35.0 | 34.0 | 33.9 | 34.2 | 34.2 | 34.2 | 34.1 | 33.1 | 33.6 | 33.6 | 33.4 | 34.4 | 34.1 | 33.6 | 33.6 | 33.6 | 33.1 |
| F50        | T08       | Gall     | 33.4 | 33.5 | 33.6 | 33.6 | 33.6 | 33.1 | 33.6 | 33.8 | 33.6 | 33.1 | 32.7 | 33.0 | 33.0 | 33.1 | 33.4 | 33.0 | 32.8 | 32.8 | 32.8 | 32.2 |
| F50        | T09       | Heart    | 34.1 | 34.7 | 34.9 | 34.4 | 34.4 | 34.2 | 34.1 | 34.2 | 34.2 | 34.1 | 34.1 | 34.1 | 34.0 | 34.0 | 33.8 | 33.9 | 34.0 | 34.1 | 34.2 | 33.5 |
| F50        | T11       | Duodenum | 34.4 | 37.1 | 36.6 | 34.1 | 35.6 | 34.2 | 35.2 | 36.0 | 34.2 | 34.2 | 33.0 | 34.1 | 33.3 | 33.4 | 33.5 | 33.4 | 33.2 | 34.0 | 33.2 | 33.0 |

Infrared imageries of human body activated by tea match the hypothesis of meridian system

(Supplementary Table 2 Continued)

| Individual | Tea       | VR Hypothenar | VR Palm center | VR Thenar | VL Thenar | VL Palm center | VL Hypothenar | DR Hypothenar | DR Palm center | DR Thenar | DL Thenar | DL Palm center | DL Hypothenar | Lung | Spleen | Colon | Stomach | Thymus | Liver | Thyroid | Gallbladder | Heart | Kidney | Duodenum | Bladder |
|------------|-----------|---------------|----------------|-----------|-----------|----------------|---------------|---------------|----------------|-----------|-----------|----------------|---------------|------|--------|-------|---------|--------|-------|---------|-------------|-------|--------|----------|---------|
| M0         | Hot water | 30.8          | 31.1           | 30.8      | 30.8      | 30.7           | 30.5          | 29.2          | 29.4           | 29.6      | 29.3      | 29.3           | 29.0          | 30.0 | 29.8   | 30.5  | 30.4    | 32.2   | 30.6  | 32.2    | 30.5        | 30.8  | 30.2   | 30.5     | 30.6    |
| M0         | T01       | 30.2          | 31.8           | 30.8      | 30.9      | 31.3           | 30.8          | 29.6          | 29.9           | 30.5      | 30.1      | 29.5           | 29.5          | 32.0 | 30.4   | 31.3  | 31.1    | 33.2   | 30.9  | 33.4    | 30.4        | 32.2  | 30.0   | 30.4     | 30.7    |
| M0         | T02       | 31.9          | 32.5           | 31.8      | 31.8      | 32.3           | 31.8          | 30.9          | 30.4           | 30.7      | 30.3      | 30.6           | 30.3          | 30.1 | 31.0   | 30.8  | 30.6    | 33.0   | 30.2  | 33.5    | 30.4        | 31.1  | 29.5   | 30.4     | 30.9    |
| M0         | T03       | 33.1          | 33.9           | 32.5      | 32.7      | 33.4           | 32.1          | 31.7          | 31.2           | 32.1      | 31.0      | 30.6           | 30.8          | 32.1 | 32.3   | 32.2  | 33.0    | 34.4   | 32.7  | 34.6    | 32.6        | 31.9  | 31.3   | 32.6     | 30.8    |
| M0         | T04a      | 31.4          | 32.3           | 31.6      | 31.4      | 31.9           | 30.9          | 30.5          | 30.6           | 31.7      | 30.8      | 30.5           | 29.5          | 31.7 | 32.5   | 31.7  | 32.5    | 33.5   | 32.3  | 32.8    | 32.2        | 31.9  | 31.0   | 32.3     | 31.9    |
| M0         | T04b      | 32.7          | 33.3           | 32.3      | 32.0      | 32.7           | 32.0          | 31.6          | 31.4           | 32.3      | 31.4      | 31.0           | 31.1          | 31.8 | 31.5   | 31.6  | 32.0    | 33.8   | 31.6  | 34.1    | 31.6        | 31.2  | 30.4   | 31.4     | 30.2    |
| M0         | T05       | 33.5          | 34.3           | 33.8      | 33.6      | 34.1           | 33.3          | 32.9          | 32.2           | 33.4      | 32.1      | 32.6           | 32.2          | 32.6 | 31.4   | 32.6  | 32.3    | 34.2   | 31.8  | 33.9    | 31.4        | 33.1  | 30.8   | 31.6     | 33.3    |
| M0         | T06       | 33.9          | 33.9           | 33.7      | 33.1      | 33.7           | 33.9          | 32.8          | 32.2           | 32.5      | 31.9      | 32.3           | 32.5          | 30.9 | 31.8   | 31.2  | 32.1    | 33.8   | 32.4  | 33.9    | 31.7        | 32.0  | 30.8   | 31.7     | 30.6    |
| M0         | T07       | 33.8          | 34.4           | 34.0      | 34.4      | 33.8           | 34.1          | 32.7          | 31.8           | 32.1      | 32.2      | 32.5           | 32.5          | 31.6 | 32.1   | 31.8  | 32.4    | 33.4   | 31.3  | 34.9    | 31.6        | 32.3  | 30.3   | 31.8     | 32.3    |
| M0         | T08       | 33.8          | 33.9           | 34.0      | 33.4      | 33.8           | 33.6          | 32.6          | 32.2           | 32.4      | 32.2      | 31.9           | 31.9          | 31.9 | 32.3   | 31.8  | 32.8    | 33.6   | 32.4  | 33.3    | 32.8        | 32.8  | 31.3   | 32.4     | 30.9    |
| M0         | T09       | 31.5          | 31.8           | 30.6      | 30.4      | 30.7           | 30.4          | 29.7          | 29.7           | 29.9      | 29.9      | 29.2           | 28.8          | 32.2 | 30.6   | 31.0  | 30.7    | 32.7   | 30.6  | 33.2    | 30.5        | 32.8  | 29.9   | 30.4     | 30.7    |
| M0         | T10       | 34.1          | 34.1           | 34.0      | 33.8      | 34.2           | 34.0          | 32.5          | 32.5           | 32.8      | 31.6      | 31.9           | 31.5          | 31.4 | 32.7   | 32.0  | 33.7    | 35.3   | 33.2  | 34.5    | 32.5        | 32.5  | 32.0   | 32.4     | 31.6    |
| M0         | T11       | 34.4          | 34.6           | 34.5      | 34.6      | 34.5           | 34.3          | 34.3          | 33.5           | 33.6      | 32.9      | 32.9           | 33.3          | 31.6 | 33.7   | 32.4  | 34.4    | 35.2   | 34.1  | 34.9    | 33.8        | 32.5  | 30.7   | 33.8     | 29.6    |
| M0         | T12       | 33.3          | 34.3           | 33.3      | 33.4      | 34.3           | 32.8          | 32.9          | 33.0           | 32.9      | 33.1      | 33.0           | 32.1          | 33.5 | 33.8   | 33.8  | 34.7    | 35.1   | 34.5  | 35.2    | 34.3        | 33.4  | 33.2   | 34.3     | 32.8    |
| M01        | Hot water | 32.7          | 32.4           | 33.9      | 32.9      | 33.1           | 33.5          | 32.7          | 32.3           | 33.7      | 32.3      | 33.2           | 33.8          | 33.0 | 33.5   | 34.0  | 33.4    | 32.2   | 33.0  | 32.4    | 34.1        | 32.9  | 33.1   | 32.4     | 33.2    |
| M01        | T01       | 36.3          | 35.7           | 36.2      | 36.2      | 36.1           | 36.3          | 35.1          | 35.0           | 34.7      | 34.8      | 35.0           | 35.4          | 32.2 | 33.6   | 33.2  | 33.2    | 34.4   | 32.8  | 35.4    | 32.8        | 33.3  | 33.1   | 33.8     | 33.6    |
| M01        | T02       | 35.9          | 35.5           | 35.9      | 36.2      | 37.1           | 36.2          | 34.3          | 34.7           | 34.6      | 34.4      | 35.3           | 34.5          | 32.8 | 33.8   | 33.9  | 33.5    | 35.0   | 32.9  | 36.2    | 33.1        | 33.3  | 33.4   | 32.9     | 33.9    |
| M01        | T03       | 35.7          | 35.5           | 35.8      | 35.8      | 35.6           | 35.8          | 34.8          | 34.7           | 34.3      | 34.7      | 34.7           | 35.1          | 33.3 | 33.4   | 33.8  | 32.6    | 34.8   | 33.2  | 35.5    | 33.0        | 33.3  | 32.9   | 33.6     | 33.5    |
| M01        | T04a      | 35.1          | 35.4           | 35.5      | 35.2      | 35.0           | 34.9          | 33.9          | 34.5           | 34.1      | 33.9      | 34.0           | 34.0          | 34.0 | 32.8   | 34.3  | 33.1    | 35.1   | 32.9  | 35.4    | 32.9        | 34.0  | 33.8   | 32.3     | 34.1    |
| M01        | T04b      | 36.6          | 36.5           | 36.9      | 36.5      | 36.5           | 36.5          | 35.6          | 35.2           | 35.3      | 35.2      | 35.4           | 35.7          | 34.4 | 34.1   | 34.1  | 33.5    | 35.7   | 34.3  | 35.8    | 33.7        | 34.4  | 33.6   | 33.3     | 33.7    |
| M01        | T05       | 35.1          | 35.1           | 35.0      | 35.1      | 36.2           | 35.0          | 34.2          | 34.1           | 34.0      | 34.2      | 35.0           | 34.5          | 32.8 | 33.1   | 33.8  | 32.8    | 36.0   | 32.1  | 35.7    | 32.1        | 33.9  | 33.1   | 32.4     | 33.2    |
| M01        | T06       | 35.6          | 35.5           | 35.6      | 35.8      | 36.3           | 35.7          | 34.4          | 34.1           | 34.0      | 34.4      | 35.1           | 34.3          | 32.0 | 32.9   | 33.3  | 32.3    | 34.6   | 32.4  | 35.6    | 31.4        | 33.1  | 33.6   | 32.1     | 33.5    |
| M01        | T07       | 35.1          | 35.3           | 35.4      | 34.9      | 35.2           | 34.9          | 33.9          | 33.6           | 33.5      | 34.0      | 33.8           | 33.5          | 32.7 | 33.1   | 33.8  | 32.8    | 34.6   | 32.4  | 35.3    | 31.8        | 33.1  | 33.6   | 32.6     | 33.8    |
| M01        | T08       | 36.3          | 36.0           | 36.4      | 36.2      | 36.1           | 36.2          | 35.1          | 35.2           | 34.5      | 34.3      | 34.7           | 34.6          | 33.1 | 33.4   | 33.9  | 32.6    | 34.7   | 33.0  | 35.7    | 32.7        | 33.6  | 33.9   | 32.3     | 33.9    |
| M01        | T09       | 35.1          | 35.0           | 35.0      | 35.5      | 36.0           | 35.4          | 34.2          | 34.6           | 34.6      | 35.2      | 35.0           | 34.7          | 33.6 | 33.8   | 33.9  | 33.5    | 34.5   | 33.8  | 35.8    | 33.7        | 34.6  | 33.5   | 33.4     | 33.8    |
| M01        | T10       | 35.3          | 35.1           | 35.3      | 35.0      | 34.8           | 35.0          | 34.3          | 34.2           | 33.7      | 33.8      | 34.3           | 34.3          | 32.1 | 32.9   | 33.2  | 32.4    | 34.1   | 31.8  | 35.2    | 32.1        | 32.8  | 33.5   | 32.1     | 33.6    |
| M01        | T11       | 35.9          | 35.7           | 35.6      | 35.5      | 35.7           | 35.9          | 34.9          | 34.7           | 34.6      | 34.6      | 34.8           | 35.2          | 32.5 | 33.9   | 33.6  | 33.2    | 34.4   | 33.3  | 35.4    | 32.8        | 33.4  | 33.4   | 33.7     | 34.0    |
| M01        | T12       | 36.2          | 36.0           | 36.3      | 36.0      | 36.0           | 36.0          | 35.1          | 35.2           | 35.0      | 35.0      | 35.3           | 35.5          | 33.2 | 34.8   | 34.1  | 34.3    | 34.9   | 33.7  | 36.1    | 34.2        | 34.0  | 33.9   | 34.4     | 34.3    |
| M03        | Hot water | 32.8          | 33.6           | 33.0      | 33.9      | 33.0           | 33.2          | 33.1          | 32.5           | 34.3      | 33.2      | 33.4           | 34.4          | 32.7 | 32.4   | 33.4  | 33.2    | 34.2   | 34.1  | 34.0    | 32.7        | 33.0  | 34.4   | 32.5     | 33.2    |
| M03        | T01       | 34.2          | 34.4           | 34.5      | 33.9      | 34.3           | 33.8          | 32.9          | 33.0           | 33.2      | 32.9      | 32.9           | 33.1          | 32.5 | 34.1   | 32.9  | 33.3    | 34.5   | 33.4  | 35.7    | 33.2        | 33.7  | 32.2   | 34.3     | 33.6    |
| M03        | T02       | 32.9          | 33.5           | 33.8      | 33.2      | 33.0           | 32.3          | 32.8          | 33.4           | 33.3      | 33.6      | 33.7           | 33.1          | 34.2 | 34.5   | 34.5  | 34.4    | 35.1   | 34.3  | 35.6    | 34.0        | 34.2  | 33.7   | 34.4     | 35.0    |
| M03        | T03       | 35.0          | 35.0           | 34.9      | 34.7      | 34.7           | 34.5          | 33.7          | 33.4           | 33.3      | 33.6      | 33.6           | 34.0          | 33.0 | 34.0   | 34.2  | 33.3    | 34.2   | 33.1  | 35.3    | 33.6        | 33.1  | 32.5   | 33.9     | 33.8    |
| M03        | T04a      | 36.5          | 36.5           | 36.5      | 35.9      | 36.3           | 36.3          | 35.0          | 33.9           | 34.2      | 34.6      | 34.6           | 34.8          | 33.5 | 34.9   | 34.0  | 34.1    | 34.7   | 34.3  | 36.0    | 34.2        | 33.4  | 32.7   | 35.4     | 34.7    |
| M03        | T04b      | 36.9          | 36.8           | 36.7      | 36.6      | 36.6           | 36.6          | 35.2          | 34.8           | 35.2      | 35.3      | 35.7           | 35.6          | 34.3 | 34.8   | 34.4  | 34.5    | 35.0   | 34.3  | 36.3    | 34.4        | 34.8  | 33.7   | 34.9     | 35.2    |
| M03        | T05       | 35.4          | 35.6           | 35.4      | 35.1      | 35.4           | 35.2          | 34.2          | 33.3           | 33.8      | 34.0      | 34.2           | 34.2          | 32.5 | 34.0   | 33.2  | 33.9    | 36.0   | 34.0  | 35.7    | 34.0        | 33.0  | 32.2   | 33.9     | 33.3    |
| M03        | T06       | 35.5          | 35.7           | 35.7      | 35.2      | 35.1           | 35.4          | 34.9          | 35.1           | 34.7      | 34.6      | 34.5           | 35.0          | 33.9 | 34.8   | 35.5  | 35.0    | 35.1   | 35.3  | 36.1    | 34.7        | 34.2  | 34.7   | 34.7     | 35.2    |
| M03        | T07       | 34.9          | 35.0           | 35.1      | 34.8      | 35.1           | 34.8          | 34.5          | 34.4           | 34.2      | 34.1      | 34.2           | 34.5          | 33.5 | 34.2   | 34.1  | 34.1    | 34.4   | 34.1  | 35.5    | 33.9        | 33.6  | 33.3   | 34.2     | 33.5    |
| M03        | T08       | 36.0          | 36.1           | 36.2      | 36.1      | 35.9           | 36.0          | 34.6          | 34.0           | 34.6      | 35.0      | 35.0           | 35.2          | 33.4 | 34.6   | 34.3  | 34.1    | 34.6   | 33.9  | 35.7    | 34.1        | 34.2  | 33.5   | 34.6     | 34.1    |
| M03        | T09       | 32.4          | 32.8           | 32.4      | 31.5      | 32.2           | 31.4          | 31.5          | 30.6           | 31.7      | 31.6      | 32.0           | 32.2          | 34.2 | 33.6   | 34.4  | 33.9    | 34.5   | 33.5  | 35.4    | 33.7        | 34.3  | 33.9   | 33.8     | 34.2    |
| M03        | T10       | 33.1          | 33.6           | 32.6      | 31.8      | 33.0           | 31.8          | 32.4          | 32.6           | 32.6      | 32.6      | 32.5           | 32.2          | 34.3 | 34.4   | 34.4  | 34.6    | 34.9   | 34.1  | 35.4    | 34.3        | 34.4  | 34.3   | 34.6     | 34.8    |
| M03        | T11       | 34.3          | 34.6           | 34.4      | 34.3      | 34.6           | 34.4          | 35.4          | 35.0           | 34.9      | 35.1      | 35.1           | 35.1          | 35.1 | 35.2   | 35.1  | 35.3    | 35.5   | 34.5  | 36.0    | 35.2        | 35.1  | 34.8   | 35.6     | 34.9    |
| M03        | T12       | 34.9          | 34.9           | 35.1      | 34.6      | 34.7           | 34.6          | 34.4          | 34.3           | 34.4      | 34.6      | 34.7           | 34.5          | 34.0 | 34.8   | 34.4  | 34.6    | 35.3   | 34.6  | 36.0    | 34.6        | 33.9  | 33.9   | 34.8     | 34.4    |
| M05        | Hot water | 35.1          | 34.7           | 33.7      | 33.5      | 33.4           | 33.7          | 35.2          | 34.0           | 33.9      | 34.6      | 35.0           | 34.3          | 34.4 | 34.8   | 33.9  | 34.0    | 34.9   | 34.9  | 33.9    | 33.3        | 33.5  | 34.6   | 34.5     | 34.3    |
| M05        | T01       | 34.5          | 34.5           | 34.7      | 34.5      | 34.2           | 34.2          | 34.3          | 34.6           | 33.3      | 33.4      | 34.2           | 33.1          | 34.5 | 34.6   | 33.9  | 34.7    | 34.7   | 34.4  | 35.8    | 34.3        | 34.3  | 33.9   | 34.7     | 34.7    |
| M05        | T02       | 34.3          | 34.8           | 34.9      | 33.8      | 33.9           | 33.4          | 33.9          | 34.1           | 33.2      | 33.4      | 33.6           | 33.6          | 34.2 | 34.4   | 33.6  | 34.4    | 35.1   | 34.3  | 35.7    | 34.6        | 34.2  | 33.8   | 34.4     | 34.4    |
| M05        | T03       | 34.9          | 34.9           | 35.1      | 35.9      | 36.4           | 35.3          | 34.4          | 34.1           | 33.2      | 33.1      | 35.0           | 33.6          | 34.7 | 35.2   | 35.5  | 35.3    | 35.2   | 35.4  | 35.4    | 35.1        | 34.6  | 34.7   | 35.1     | 35.3    |
| M05        | T04a      | 37.3          | 37.3           | 37.2      | 36.8      | 36.7           | 36.7          | 35.9          | 35.4           | 34.4      | 35.0      | 34.8           | 35.6          | 35.0 | 35.1   | 34.0  | 34.6    | 35.8   | 35.0  | 35.7    | 35.0        | 35.0  | 35.3   | 35.2     | 34.9    |
| M05        | T04b      | 36.6          | 37.1           | 36.8      | 36.6      | 36.6           | 36.4          | 35.9          | 36.1           | 34.4      | 34.5      | 35.6           | 34.7          | 35.8 | 36.0   | 34.6  | 35.6    | 36.3   | 35.9  | 35.7    | 35.7        | 35.6  | 35.7   | 35.7     | 35.4    |
| M05        | T05       | 35.5          | 35.7           | 35.8      | 35.2      | 35.5           | 35.3          | 35.1          | 34.6           | 33.5      | 33.9      | 35.4           | 34.8          | 34.4 | 34.5   | 33.9  | 34.6    | 35.0   | 34.7  | 34.7    | 34.4        | 34.3  | 34.3   | 34.8     | 34.7    |
| M05        | T06       | 35.2          | 35.5           | 35.6      | 35.2      | 36.7           | 34.6          | 34.4          | 34.3           | 32.3      | 32.9      | 34.4           | 33.4          | 33.8 | 33.8   | 32.8  | 32.9    | 34.2   | 33.9  | 34.7    | 33.3        | 33.9  | 33.2   | 34.2     | 34.2    |
| M05        | T08       |               |                |           |           |                |               |               |                |           |           |                |               |      |        |       |         |        |       |         |             |       |        |          |         |

**Infrared imageries of human body activated by tea match the hypothesis of meridian system**

**(Supplementary Table 2 Continued)**

| Individual | Tea       | VR Hypothenar | VR Palm center | VR Thenar | VL Thenar | VL Palm center | VL Hypothenar | DR Hypothenar | DR Palm center | DR Thenar | DL Thenar | DL Palm center | DL Hypothenar | Lung | Spleen | Colon | Stomach | Thymus | Liver | Thyroid | Gallbladder | Heart | Kidney | Duodenum | Bladder |      |
|------------|-----------|---------------|----------------|-----------|-----------|----------------|---------------|---------------|----------------|-----------|-----------|----------------|---------------|------|--------|-------|---------|--------|-------|---------|-------------|-------|--------|----------|---------|------|
| M11        | Hot water | 32.7          | 32.9           | 33.3      | 33.1      | 33.1           | 33.4          | 33.3          | 32.0           | 32.5      | 32.6      | 32.1           | 33.4          | 33.1 | 32.6   | 32.0  | 32.6    | 33.4   | 32.9  | 31.9    | 33.5        | 32.2  | 32.7   | 33.0     | 32.2    |      |
| M11        | T01       | 34.0          | 34.3           | 34.6      | 33.7      | 34.3           | 34.0          | 31.5          | 31.7           | 31.9      | 32.2      | 32.3           | 32.1          | 32.2 | 33.1   | 33.3  | 32.5    | 33.9   | 33.1  | 34.6    | 32.8        | 32.8  | 32.5   | 32.8     | 33.4    |      |
| M11        | T02       | 34.7          | 34.8           | 34.8      | 34.3      | 34.7           | 34.3          | 32.6          | 32.0           | 32.1      | 32.9      | 32.8           | 32.2          | 32.2 | 33.0   | 32.8  | 32.4    | 33.9   | 32.7  | 34.7    | 32.4        | 32.5  | 31.8   | 32.6     | 33.3    |      |
| M11        | T05       | 35.0          | 35.4           | 35.1      | 35.1      | 35.2           | 34.9          | 33.2          | 33.3           | 33.2      | 33.6      | 33.4           | 33.3          | 32.1 | 32.6   | 32.9  | 32.9    | 36.2   | 33.2  | 35.9    | 32.7        | 32.7  | 32.3   | 32.9     | 32.7    |      |
| M11        | T06       | 36.3          | 36.4           | 36.4      | 36.3      | 36.5           | 36.3          | 34.8          | 34.4           | 33.6      | 34.5      | 34.3           | 34.1          | 32.6 | 33.1   | 33.2  | 32.5    | 35.0   | 33.2  | 35.8    | 31.8        | 33.2  | 32.1   | 32.7     | 33.5    |      |
| M11        | T07       | 35.4          | 35.6           | 35.8      | 35.7      | 35.5           | 35.5          | 33.8          | 33.9           | 33.0      | 33.8      | 33.3           | 33.8          | 31.8 | 33.4   | 33.4  | 32.4    | 34.4   | 33.2  | 34.8    | 32.3        | 32.6  | 32.5   | 32.5     | 33.5    |      |
| M11        | T09       | 34.8          | 35.1           | 34.7      | 34.4      | 34.8           | 34.5          | 32.9          | 33.1           | 33.0      | 33.1      | 33.2           | 32.6          | 33.5 | 33.2   | 33.8  | 33.4    | 34.6   | 33.2  | 35.7    | 33.1        | 34.0  | 33.0   | 33.3     | 33.5    |      |
| M11        | T10       | 34.5          | 34.5           | 34.5      | 34.2      | 34.1           | 33.7          | 32.8          | 32.8           | 32.8      | 32.9      | 32.7           | 32.1          | 33.4 | 32.6   | 33.6  | 32.6    | 34.5   | 33.1  | 35.4    | 33.2        | 33.5  | 33.7   | 32.8     | 34.0    |      |
| M11        | T12       | 35.6          | 35.5           | 35.7      | 35.7      | 35.2           | 35.4          | 33.3          | 33.4           | 33.0      | 33.6      | 33.4           | 33.2          | 31.8 | 33.2   | 32.6  | 32.3    | 34.3   | 32.7  | 34.9    | 32.4        | 32.4  | 32.3   | 32.8     | 33.2    |      |
| M13        | Hot water | 31.3          | 32.8           | 33.0      | 33.0      | 32.0           | 32.8          | 31.9          | 32.3           | 31.4      | 31.9      | 32.5           | 31.7          | 32.1 | 31.9   | 31.0  | 31.3    | 32.3   | 32.2  | 31.7    | 32.6        | 32.3  | 31.8   | 32.7     | 32.8    |      |
| M13        | T01       | 33.3          | 34.1           | 33.7      | 33.4      | 33.8           | 33.1          | 31.0          | 30.6           | 31.4      | 31.4      | 30.9           | 31.6          | 31.8 | 31.7   | 32.0  | 32.1    | 32.5   | 31.3  | 32.9    | 31.5        | 32.0  | 31.4   | 31.4     | 32.0    |      |
| M13        | T02       | 34.6          | 34.9           | 34.5      | 34.5      | 34.8           | 34.6          | 32.4          | 30.7           | 32.7      | 32.4      | 31.1           | 32.7          | 30.9 | 32.1   | 31.8  | 31.2    | 32.4   | 31.5  | 33.9    | 32.0        | 31.2  | 31.6   | 32.4     | 32.3    |      |
| M13        | T03       | 34.4          | 35.1           | 34.4      | 34.1      | 34.3           | 34.1          | 32.5          | 31.6           | 32.1      | 32.3      | 31.6           | 32.5          | 32.8 | 33.0   | 33.3  | 32.9    | 33.4   | 32.4  | 33.6    | 32.9        | 33.1  | 32.3   | 32.7     | 33.6    |      |
| M13        | T04a      | 34.8          | 35.4           | 34.9      | 34.4      | 35.3           | 34.8          | 31.8          | 31.4           | 33.0      | 31.7      | 31.7           | 32.0          | 31.8 | 32.7   | 32.5  | 32.0    | 33.1   | 32.0  | 32.7    | 32.4        | 32.3  | 31.4   | 32.5     | 32.9    |      |
| M13        | T04b      | 33.7          | 35.9           | 35.5      | 35.4      | 35.6           | 35.7          | 33.7          | 32.6           | 33.5      | 33.3      | 32.8           | 33.4          | 32.5 | 33.3   | 33.1  | 32.7    | 33.7   | 32.9  | 33.3    | 32.9        | 32.6  | 32.5   | 32.8     | 33.2    |      |
| M13        | T05       | 34.2          | 34.9           | 34.0      | 34.0      | 34.5           | 33.7          | 32.1          | 31.1           | 31.8      | 31.6      | 31.7           | 32.3          | 31.3 | 32.3   | 32.1  | 32.1    | 34.8   | 31.7  | 34.5    | 32.0        | 31.6  | 31.7   | 31.9     | 32.2    |      |
| M13        | T07       | 33.1          | 33.9           | 33.2      | 32.9      | 33.5           | 33.3          | 31.3          | 30.4           | 31.5      | 31.6      | 31.5           | 32.0          | 30.8 | 32.0   | 31.9  | 31.0    | 32.5   | 31.4  | 33.2    | 31.5        | 30.4  | 31.3   | 31.5     | 31.7    |      |
| M13        | T08       | 34.9          | 35.5           | 35.1      | 34.7      | 35.2           | 34.8          | 32.7          | 31.6           | 33.5      | 32.2      | 32.1           | 33.0          | 32.3 | 33.3   | 33.6  | 32.3    | 33.6   | 32.9  | 34.4    | 33.6        | 32.5  | 32.8   | 32.9     | 33.9    |      |
| M13        | T09       | 33.5          | 34.2           | 33.2      | 33.2      | 34.0           | 33.4          | 32.5          | 31.8           | 33.6      | 31.6      | 31.7           | 32.0          | 30.9 | 32.3   | 32.2  | 31.8    | 33.3   | 32.2  | 33.9    | 32.4        | 32.1  | 31.8   | 32.2     | 32.5    |      |
| M13        | T10       | 33.8          | 34.3           | 33.7      | 33.5      | 33.5           | 33.4          | 32.4          | 31.6           | 32.5      | 32.1      | 31.7           | 32.7          | 31.0 | 32.3   | 32.3  | 31.8    | 33.1   | 32.2  | 33.6    | 32.4        | 31.2  | 32.7   | 32.9     | 32.0    |      |
| M13        | T11       | 32.8          | 33.5           | 33.1      | 33.2      | 33.6           | 33.2          | 31.4          | 30.7           | 31.8      | 31.7      | 31.2           | 32.0          | 31.6 | 32.6   | 32.2  | 31.5    | 32.8   | 31.5  | 33.7    | 32.7        | 31.7  | 31.6   | 32.5     | 33.3    |      |
| M13        | T12       | 33.2          | 34.0           | 33.4      | 33.8      | 34.1           | 33.9          | 31.5          | 31.0           | 32.3      | 32.2      | 31.7           | 32.0          | 31.3 | 32.3   | 31.7  | 31.4    | 33.2   | 31.9  | 33.6    | 32.1        | 31.4  | 31.4   | 32.1     | 32.6    |      |
| M15        | Hot water | 31.1          | 32.3           | 31.8      | 31.6      | 31.5           | 32.1          | 32.3          | 31.8           | 31.8      | 32.8      | 32.3           | 32.9          | 31.4 | 32.0   | 32.8  | 33.0    | 31.1   | 31.6  | 32.2    | 33.0        | 32.3  | 32.1   | 32.6     | 31.4    |      |
| M15        | T01       | 35.3          | 35.0           | 35.5      | 35.6      | 35.1           | 35.2          | 34.3          | 34.2           | 34.1      | 33.3      | 33.8           | 33.8          | 33.4 | 33.4   | 32.7  | 33.8    | 34.7   | 33.6  | 34.9    | 33.6        | 33.0  | 32.4   | 33.0     | 33.2    |      |
| M15        | T02       | 35.6          | 35.5           | 35.7      | 34.7      | 34.7           | 34.9          | 34.3          | 34.5           | 34.4      | 33.8      | 33.9           | 33.8          | 32.6 | 33.3   | 32.4  | 33.3    | 34.3   | 33.4  | 35.1    | 33.2        | 32.4  | 32.3   | 32.0     | 33.2    |      |
| M15        | T03       | 36.8          | 36.4           | 36.8      | 36.5      | 35.6           | 36.2          | 35.4          | 35.7           | 35.0      | 34.3      | 34.7           | 34.6          | 35.1 | 33.7   | 33.6  | 34.4    | 35.7   | 34.8  | 36.1    | 34.3        | 33.5  | 32.9   | 33.2     | 33.3    |      |
| M15        | T04a      | 36.6          | 36.5           | 36.7      | 36.7      | 36.1           | 36.6          | 36.1          | 35.3           | 35.7      | 34.5      | 35.3           | 35.4          | 35.0 | 33.3   | 33.6  | 34.1    | 35.1   | 34.2  | 35.9    | 33.6        | 34.6  | 33.3   | 32.9     | 33.9    |      |
| M15        | T04b      | 37.1          | 36.9           | 37.1      | 37.0      | 36.8           | 36.7          | 35.6          | 35.7           | 35.6      | 35.2      | 35.1           | 35.2          | 34.0 | 35.1   | 33.4  | 35.7    | 36.0   | 35.3  | 36.0    | 35.4        | 33.7  | 33.4   | 34.7     | 34.3    |      |
| M15        | T05       | 36.7          | 36.5           | 36.7      | 36.2      | 36.3           | 36.5          | 34.6          | 34.6           | 33.9      | 34.1      | 34.5           | 34.9          | 35.5 | 32.1   | 33.0  | 31.9    | 34.7   | 32.4  | 34.4    | 32.4        | 34.4  | 31.6   | 30.8     | 32.7    |      |
| M15        | T06       | 36.1          | 36.0           | 36.5      | 36.1      | 36.1           | 35.6          | 34.7          | 34.2           | 34.3      | 33.8      | 34.2           | 34.4          | 33.2 | 32.3   | 32.1  | 32.2    | 33.7   | 32.2  | 33.8    | 32.1        | 32.8  | 31.4   | 30.9     | 31.8    |      |
| M15        | T07       | 36.4          | 36.2           | 36.3      | 36.1      | 35.2           | 35.6          | 34.3          | 35.2           | 34.4      | 33.4      | 34.1           | 33.9          | 31.8 | 32.1   | 31.2  | 32.6    | 33.6   | 32.4  | 34.3    | 32.7        | 31.3  | 30.9   | 31.5     | 32.3    |      |
| M15        | T08       | 36.9          | 36.7           | 37.1      | 36.9      | 36.3           | 36.0          | 35.4          | 35.3           | 35.3      | 34.2      | 34.2           | 34.5          | 34.8 | 33.6   | 33.5  | 34.1    | 35.4   | 34.0  | 35.8    | 33.8        | 34.0  | 32.9   | 33.0     | 34.2    |      |
| M15        | T09       | 35.0          | 34.8           | 34.9      | 34.9      | 33.9           | 34.2          | 34.1          | 33.8           | 33.6      | 32.9      | 33.6           | 33.4          | 31.3 | 30.8   | 31.0  | 31.2    | 33.6   | 31.2  | 33.6    | 31.9        | 31.0  | 30.3   | 30.2     | 30.7    |      |
| M15        | T10       | 35.7          | 36.1           | 36.0      | 35.4      | 35.0           | 35.3          | 34.7          | 35.1           | 34.7      | 33.8      | 33.8           | 33.8          | 31.9 | 32.2   | 32.0  | 32.3    | 33.0   | 32.4  | 34.2    | 33.2        | 32.0  | 32.5   | 32.1     | 32.3    |      |
| M15        | T11       | 35.8          | 35.6           | 36.2      | 35.7      | 35.0           | 35.4          | 34.4          | 34.4           | 34.4      | 33.7      | 34.0           | 34.1          | 34.9 | 33.6   | 33.5  | 34.0    | 34.7   | 33.8  | 35.3    | 33.8        | 34.3  | 33.3   | 33.4     | 33.9    |      |
| M15        | T12       | 35.7          | 35.4           | 36.0      | 35.5      | 34.7           | 35.1          | 34.4          | 34.2           | 34.1      | 34.1      | 34.1           | 34.1          | 34.2 | 33.6   | 33.1  | 32.6    | 33.8   | 35.1  | 33.6    | 35.6        | 33.2  | 33.0   | 32.1     | 32.6    | 32.9 |
| M17        | Hot water | 33.4          | 33.0           | 33.0      | 32.1      | 32.5           | 32.0          | 32.4          | 32.0           | 33.2      | 33.4      | 32.8           | 32.5          | 32.0 | 32.4   | 33.5  | 32.7    | 32.7   | 32.3  | 31.6    | 32.4        | 31.9  | 32.6   | 32.8     | 32.2    |      |
| M17        | T01       | 35.0          | 35.3           | 35.4      | 34.9      | 34.9           | 34.5          | 33.9          | 33.8           | 33.4      | 33.6      | 34.0           | 34.2          | 33.4 | 35.1   | 33.2  | 34.8    | 35.2   | 35.6  | 34.3    | 35.7        | 33.7  | 33.9   | 35.1     | 34.2    |      |
| M17        | T02       | 34.8          | 35.0           | 35.1      | 34.9      | 34.8           | 34.9          | 32.9          | 33.2           | 32.3      | 33.2      | 33.5           | 33.5          | 31.9 | 34.3   | 32.4  | 33.7    | 33.7   | 34.3  | 33.3    | 34.5        | 32.1  | 32.6   | 33.9     | 33.5    |      |
| M17        | T03       | 35.8          | 35.7           | 35.9      | 35.3      | 35.6           | 35.1          | 33.9          | 33.9           | 34.4      | 33.2      | 33.7           | 33.8          | 32.7 | 34.6   | 32.6  | 35.2    | 35.2   | 34.8  | 33.5    | 34.5        | 33.3  | 34.0   | 34.7     | 34.8    |      |
| M17        | T04a      | 36.3          | 36.6           | 36.3      | 36.0      | 36.4           | 36.2          | 34.2          | 34.5           | 34.8      | 34.3      | 34.3           | 34.7          | 33.7 | 34.7   | 33.5  | 34.9    | 35.0   | 34.7  | 33.9    | 35.0        | 34.1  | 34.4   | 34.6     | 35.0    |      |
| M17        | T04b      | 35.7          | 36.0           | 36.0      | 35.7      | 35.9           | 35.5          | 32.6          | 33.5           | 32.4      | 33.0      | 33.5           | 33.8          | 32.2 | 34.1   | 32.7  | 34.0    | 34.2   | 33.7  | 33.1    | 34.2        | 32.9  | 33.2   | 33.6     | 33.4    |      |
| M17        | T05       | 35.5          | 35.6           | 35.7      | 35.6      | 35.6           | 35.7          | 33.0          | 33.8           | 33.6      | 33.3      | 33.8           | 33.9          | 31.5 | 34.6   | 31.5  | 33.6    | 33.7   | 34.4  | 33.4    | 34.2        | 32.0  | 32.4   | 33.6     | 32.6    |      |
| M17        | T06       | 36.2          | 36.1           | 36.4      | 36.4      | 36.4           | 36.3          | 34.8          | 34.9           | 33.8      | 34.2      | 35.2           | 35.0          | 33.6 | 34.9   | 33.1  | 34.3    | 34.1   | 35.4  | 33.3    | 34.8        | 33.7  | 33.6   | 33.7     | 34.5    |      |
| M17        | T07       | 34.7          | 35.1           | 34.8      | 34.5      | 34.8           | 34.2          | 32.8          | 32.9           | 32.0      | 32.0      | 33.0           | 33.0          | 32.3 | 34.1   | 32.7  | 33.5    | 34.0   | 34.4  | 33.0    | 34.0        | 33.1  | 33.1   | 33.4     | 33.4    |      |
| M17        | T08       | 35.2          | 35.2           | 35.0      | 35.0      | 35.0           | 34.8          | 32.8          | 33.1           | 32.4      | 33.3      | 33.6           | 33.5          | 32.4 | 34.2   | 32.7  | 34.4    | 34.3   | 34.7  | 33.6    | 34.9        | 32.8  | 33.9   | 34.1     | 34.4    |      |
| M17        | T09       | 35.0          | 35.6           | 35.2      | 34.9      | 35.5           | 35.2          | 33.2          | 33.2           | 33.0      | 32.5      | 33.1           | 33.1          | 31.8 | 34.6   | 32.0  | 34.6    | 35.0   | 34.3  | 34.7    | 33.6        | 34.9  | 31.6   | 33.2     | 33.7    |      |
| M17        | T10       | 34.0          | 34.1           | 34.2      | 34.1      | 33.9           | 33.9          | 32.8          | 32.9           | 32.9      | 32.9      | 33.3           | 32.6          | 32.7 | 34.5   | 32.4  | 34.1    | 34.3   | 34.9  | 33.8    | 34.9        | 32.9  | 33.1   | 34.2     | 33.8    |      |
| M17        | T11       | 36.6          | 36.6           | 36.7      | 36.3      | 36.5           | 36.3          | 34.8          | 34.9           | 34.3      | 35.5      | 34.8           | 35.0          | 33.8 | 35.6   | 33.3  | 35.8    | 35.6   | 35.7  | 34.4    | 36.0        | 34.1  | 34.4   | 36.4     | 35.4    |      |
| M17        | T12       | 34.7          | 34.9           | 34.6      | 34.3      | 34.5           | 34.3          | 34.1          | 34.1           | 33.3      | 34.0      | 34.3           | 34.2          | 34.3 | 34.6   | 34.2  | 34.4    | 35.0   | 35.0  | 34.5    | 35.1        | 34.7  | 34.2   | 35.1     | 34.1    |      |
| M19        | Hot water | 32.3          | 33.0           | 32.3      | 31.5      | 31.8           | 31.7          | 31.1          | 32.1           | 31.5      | 32.2      | 31.3           | 31.2          | 33.0 | 33.1   | 31.6  | 32.1    | 31.6   | 32.0  | 31.0    | 32.1        | 32.5  | 32.7   | 31.1     | 32.9    |      |

Infrared imageries of human body activated by tea match the hypothesis of meridian system

(Supplementary Table 2 Continued)

| Individual | Tea       | VR Hypothenar | VR Palm center | VR Thenar | VL Thenar | VL Palm center | VL Hypothenar | DR Hypothenar | DR Palm center | DR Thenar | DL Thenar | DL Palm center | DL Hypothenar | Lung | Spleen | Colon | Stomach | Thymus | Liver | Thyroid | Gallbladder | Heart | Kidney | Duodenum | Bladder |
|------------|-----------|---------------|----------------|-----------|-----------|----------------|---------------|---------------|----------------|-----------|-----------|----------------|---------------|------|--------|-------|---------|--------|-------|---------|-------------|-------|--------|----------|---------|
| M23        | Hot water | 34.1          | 34.6           | 34.4      | 34.1      | 33.2           | 33.5          | 33.3          | 34.3           | 33.8      | 33.6      | 33.2           | 33.5          | 33.1 | 34.6   | 33.8  | 34.2    | 33.1   | 34.4  | 33.3    | 33.1        | 34.9  | 34.3   | 33.2     | 34.2    |
| M23        | T01       | 35.6          | 35.3           | 35.5      | 35.7      | 35.5           | 35.4          | 34.9          | 34.7           | 35.2      | 35.3      | 35.1           | 34.9          | 35.4 | 35.3   | 35.2  | 35.5    | 35.6   | 35.0  | 36.5    | 34.5        | 35.4  | 34.4   | 35.3     | 34.9    |
| M23        | T02       | 34.8          | 35.0           | 35.0      | 34.8      | 34.7           | 34.7          | 33.9          | 33.6           | 33.7      | 33.2      | 33.6           | 33.5          | 33.7 | 33.7   | 33.9  | 33.9    | 34.5   | 33.7  | 35.4    | 32.9        | 34.5  | 34.1   | 33.4     | 34.4    |
| M23        | T03       | 34.8          | 34.9           | 35.0      | 34.6      | 34.5           | 34.5          | 33.9          | 33.4           | 33.8      | 33.5      | 34.0           | 34.1          | 34.1 | 33.9   | 34.0  | 34.1    | 34.5   | 33.9  | 35.3    | 33.2        | 34.8  | 33.9   | 33.7     | 34.0    |
| M23        | T04a      | 35.0          | 34.9           | 35.3      | 35.0      | 35.0           | 35.3          | 34.0          | 33.7           | 34.0      | 33.8      | 34.1           | 33.9          | 34.9 | 34.8   | 34.9  | 34.8    | 35.6   | 34.9  | 35.5    | 34.6        | 35.4  | 34.1   | 34.0     | 35.2    |
| M23        | T04b      | 36.0          | 36.2           | 36.2      | 36.4      | 36.2           | 36.0          | 34.9          | 34.1           | 34.1      | 34.1      | 34.1           | 34.4          | 34.3 | 34.7   | 34.3  | 35.0    | 35.2   | 34.3  | 35.8    | 33.8        | 34.7  | 34.0   | 34.7     | 34.4    |
| M23        | T05       | 34.3          | 34.7           | 34.2      | 34.4      | 34.4           | 34.2          | 33.3          | 33.7           | 33.7      | 33.5      | 33.2           | 33.2          | 34.4 | 34.3   | 34.7  | 34.4    | 36.1   | 34.3  | 35.8    | 33.9        | 35.3  | 34.6   | 34.5     | 35.0    |
| M23        | T06       | 34.5          | 35.0           | 35.0      | 34.6      | 34.5           | 34.7          | 33.0          | 33.1           | 33.1      | 33.5      | 34.0           | 33.0          | 33.8 | 32.7   | 33.0  | 33.5    | 33.9   | 33.6  | 34.8    | 32.3        | 34.2  | 32.9   | 32.4     | 33.3    |
| M23        | T06       | 35.2          | 35.5           | 35.5      | 35.4      | 35.6           | 35.3          | 34.5          | 34.2           | 34.8      | 34.0      | 34.0           | 34.0          | 34.9 | 34.1   | 34.8  | 34.4    | 35.5   | 34.9  | 35.9    | 33.7        | 35.4  | 34.4   | 34.0     | 35.1    |
| M23        | T07       | 34.9          | 34.8           | 34.9      | 34.9      | 34.6           | 34.6          | 33.2          | 32.6           | 33.6      | 33.0      | 33.2           | 33.2          | 34.1 | 33.7   | 33.7  | 33.9    | 34.4   | 33.9  | 35.4    | 33.1        | 34.4  | 33.9   | 33.4     | 33.9    |
| M23        | T08       | 35.7          | 35.5           | 35.7      | 35.6      | 35.4           | 35.5          | 33.7          | 33.2           | 33.6      | 34.1      | 34.6           | 33.7          | 34.1 | 34.1   | 34.1  | 34.2    | 35.0   | 33.9  | 35.4    | 33.7        | 34.5  | 33.8   | 33.9     | 34.2    |
| M23        | T09       | 33.3          | 33.5           | 33.3      | 33.5      | 33.6           | 33.6          | 33.2          | 33.1           | 33.8      | 33.3      | 33.1           | 33.1          | 34.2 | 33.8   | 34.6  | 34.3    | 34.9   | 34.3  | 35.7    | 33.9        | 34.9  | 33.7   | 34.2     | 34.3    |
| M23        | T10       | 35.2          | 34.8           | 34.9      | 34.6      | 34.7           | 34.4          | 34.2          | 33.8           | 34.1      | 34.1      | 34.1           | 34.1          | 34.5 | 34.2   | 34.4  | 34.4    | 35.2   | 34.5  | 35.9    | 33.8        | 35.2  | 34.5   | 34.4     | 34.7    |
| M23        | T11       | 35.7          | 35.8           | 36.0      | 35.8      | 35.9           | 35.8          | 35.0          | 35.1           | 34.7      | 34.9      | 35.2           | 35.1          | 34.8 | 35.1   | 34.9  | 35.1    | 35.4   | 35.0  | 36.2    | 34.7        | 35.3  | 34.4   | 35.1     | 35.2    |
| M23        | T12       | 36.2          | 36.1           | 36.2      | 36.1      | 35.7           | 35.8          | 35.1          | 35.2           | 34.7      | 35.1      | 35.3           | 34.8          | 34.6 | 34.6   | 34.6  | 35.0    | 35.5   | 34.9  | 36.4    | 34.4        | 35.3  | 34.1   | 34.9     | 34.6    |
| M25        | Hot water | 33.3          | 33.4           | 32.5      | 33.0      | 33.5           | 32.4          | 33.2          | 33.5           | 32.5      | 32.9      | 33.7           | 32.2          | 32.3 | 33.8   | 32.2  | 32.5    | 33.7   | 32.6  | 33.3    | 33.6        | 33.6  | 33.4   | 33.3     | 33.5    |
| M25        | T01       | 33.3          | 33.9           | 32.9      | 33.4      | 33.9           | 32.8          | 32.2          | 32.3           | 32.5      | 32.3      | 32.5           | 32.1          | 35.1 | 35.4   | 34.8  | 35.1    | 34.9   | 35.2  | 33.9    | 35.4        | 35.2  | 34.7   | 35.3     | 34.8    |
| M25        | T02       | 34.7          | 35.0           | 34.8      | 34.3      | 34.4           | 34.2          | 34.9          | 34.6           | 34.6      | 34.0      | 34.1           | 34.0          | 35.0 | 35.4   | 34.8  | 35.3    | 35.8   | 35.5  | 35.9    | 35.6        | 34.7  | 34.9   | 35.2     | 34.9    |
| M25        | T04a      | 36.5          | 36.6           | 36.0      | 36.1      | 36.3           | 36.0          | 34.8          | 34.5           | 34.6      | 34.6      | 34.6           | 35.0          | 34.0 | 35.3   | 33.7  | 35.4    | 35.7   | 35.2  | 35.7    | 34.9        | 34.3  | 33.7   | 35.3     | 33.9    |
| M25        | T04b      | 36.4          | 36.9           | 36.2      | 36.6      | 36.7           | 36.5          | 35.1          | 34.8           | 35.1      | 34.9      | 34.9           | 35.0          | 34.3 | 35.6   | 34.0  | 35.4    | 35.7   | 35.0  | 35.8    | 35.2        | 34.3  | 33.9   | 35.7     | 35.0    |
| M25        | T05       | 35.3          | 35.6           | 35.0      | 34.7      | 34.9           | 34.5          | 33.6          | 33.0           | 33.1      | 32.6      | 32.6           | 32.8          | 33.8 | 34.3   | 33.2  | 34.2    | 35.4   | 34.1  | 35.1    | 34.0        | 34.0  | 33.2   | 34.2     | 33.6    |
| M25        | T06       | 36.0          | 35.9           | 35.3      | 35.0      | 35.7           | 35.6          | 34.5          | 33.6           | 33.8      | 34.0      | 33.5           | 33.7          | 33.0 | 34.3   | 32.8  | 34.1    | 34.8   | 34.2  | 35.0    | 33.9        | 33.3  | 32.8   | 34.1     | 33.1    |
| M25        | T07       | 35.1          | 35.2           | 34.8      | 33.8      | 34.5           | 33.8          | 32.6          | 31.9           | 32.5      | 32.2      | 31.9           | 32.0          | 32.5 | 33.7   | 32.3  | 33.2    | 34.0   | 33.2  | 34.6    | 33.0        | 32.5  | 32.2   | 33.1     | 33.0    |
| M25        | T08       | 34.9          | 35.6           | 34.8      | 34.7      | 35.6           | 34.6          | 33.6          | 33.8           | 33.5      | 33.5      | 33.5           | 33.6          | 33.6 | 34.5   | 33.4  | 34.4    | 34.9   | 34.5  | 35.0    | 34.4        | 33.9  | 33.4   | 34.8     | 33.5    |
| M25        | T09       | 34.6          | 34.7           | 34.2      | 33.7      | 34.3           | 34.0          | 33.3          | 32.9           | 32.9      | 32.8      | 32.8           | 32.8          | 32.7 | 33.5   | 32.5  | 33.6    | 34.5   | 33.7  | 35.0    | 33.4        | 32.8  | 32.4   | 33.6     | 32.7    |
| M25        | T10       | 36.4          | 35.3           | 35.5      | 33.7      | 34.3           | 34.2          | 34.1          | 33.7           | 33.7      | 33.3      | 33.3           | 33.3          | 33.4 | 34.4   | 33.3  | 34.6    | 34.9   | 34.5  | 35.4    | 34.4        | 33.4  | 33.5   | 34.5     | 33.3    |
| M25        | T12       | 34.8          | 35.0           | 34.8      | 34.5      | 35.0           | 34.4          | 33.8          | 33.7           | 33.8      | 33.8      | 33.6           | 33.6          | 33.9 | 34.7   | 33.3  | 34.6    | 34.9   | 34.7  | 35.5    | 34.6        | 33.9  | 33.6   | 34.4     | 33.9    |
| M27        | Hot water | 33.3          | 33.4           | 34.2      | 34.3      | 32.9           | 34.4          | 34.5          | 33.9           | 32.7      | 33.1      | 33.6           | 32.8          | 34.1 | 33.0   | 33.2  | 32.6    | 33.8   | 33.5  | 33.6    | 33.4        | 33.2  | 33.2   | 33.8     | 34.1    |
| M27        | T01       | 35.2          | 35.4           | 35.2      | 35.2      | 35.4           | 35.2          | 34.9          | 34.3           | 34.7      | 35.1      | 35.1           | 35.2          | 33.8 | 34.0   | 33.0  | 34.1    | 34.7   | 34.0  | 35.4    | 34.6        | 33.0  | 33.8   | 34.2     | 33.5    |
| M27        | T02       | 35.5          | 35.9           | 35.8      | 34.9      | 35.0           | 34.7          | 34.4          | 33.3           | 33.6      | 33.8      | 33.1           | 34.0          | 33.2 | 33.9   | 33.2  | 33.6    | 34.3   | 33.7  | 34.8    | 34.0        | 33.2  | 33.1   | 34.1     | 33.6    |
| M27        | T03       | 35.9          | 36.0           | 35.9      | 35.8      | 35.6           | 35.6          | 35.9          | 35.5           | 35.6      | 35.6      | 35.5           | 35.5          | 34.8 | 35.2   | 35.4  | 34.8    | 35.5   | 35.1  | 36.3    | 35.2        | 34.9  | 35.0   | 35.5     | 34.5    |
| M27        | T04a      | 37.2          | 37.4           | 37.1      | 37.2      | 37.2           | 36.8          | 37.2          | 36.2           | 36.5      | 37.0      | 36.3           | 37.1          | 34.4 | 34.2   | 34.7  | 34.6    | 35.6   | 34.6  | 35.5    | 35.1        | 35.3  | 35.2   | 34.6     | 35.3    |
| M27        | T04b      | 37.2          | 37.2           | 37.1      | 37.0      | 37.1           | 37.1          | 36.8          | 36.1           | 36.3      | 36.4      | 36.4           | 36.8          | 34.7 | 35.9   | 34.9  | 35.8    | 36.3   | 35.7  | 36.5    | 35.8        | 35.1  | 35.5   | 36.0     | 35.2    |
| M27        | T05       | 36.5          | 37.0           | 36.7      | 36.3      | 36.6           | 36.1          | 35.4          | 35.3           | 35.3      | 35.5      | 35.2           | 35.8          | 33.2 | 34.7   | 33.4  | 34.0    | 36.5   | 34.7  | 36.2    | 34.5        | 33.9  | 33.6   | 34.0     | 33.1    |
| M27        | T06       | 36.4          | 36.7           | 36.4      | 35.8      | 36.1           | 35.9          | 35.5          | 34.9           | 35.2      | 35.2      | 35.0           | 35.4          | 32.9 | 34.1   | 33.0  | 33.6    | 35.0   | 34.5  | 35.2    | 34.3        | 33.3  | 33.4   | 33.4     | 33.4    |
| M27        | T07       | 35.9          | 36.3           | 36.2      | 36.0      | 36.4           | 36.1          | 35.4          | 34.8           | 35.5      | 35.4      | 34.9           | 35.7          | 33.4 | 34.2   | 33.2  | 33.8    | 34.8   | 34.0  | 35.7    | 34.2        | 33.4  | 33.6   | 34.1     | 33.5    |
| M27        | T08       | 36.0          | 36.1           | 36.0      | 35.9      | 36.0           | 35.9          | 35.8          | 34.9           | 35.2      | 35.5      | 35.3           | 35.5          | 33.9 | 34.7   | 33.9  | 34.9    | 35.5   | 35.1  | 35.8    | 35.4        | 34.6  | 34.7   | 35.1     | 34.3    |
| M27        | T09       | 36.0          | 36.4           | 36.0      | 36.0      | 36.2           | 36.0          | 35.0          | 34.4           | 34.7      | 34.4      | 34.4           | 35.4          | 32.6 | 33.8   | 32.7  | 33.6    | 34.8   | 34.3  | 36.0    | 34.3        | 33.9  | 32.9   | 34.1     | 32.9    |
| M27        | T10       | 35.8          | 36.1           | 35.8      | 35.8      | 36.3           | 35.8          | 35.9          | 34.9           | 35.1      | 35.5      | 35.2           | 35.6          | 35.3 | 35.8   | 35.3  | 36.1    | 36.4   | 35.9  | 37.4    | 36.1        | 35.6  | 35.5   | 36.1     | 34.9    |
| M27        | T11       | 36.1          | 36.4           | 36.3      | 36.4      | 36.4           | 36.2          | 35.7          | 35.3           | 35.4      | 35.8      | 35.7           | 35.9          | 34.1 | 34.9   | 34.0  | 34.9    | 35.7   | 35.3  | 36.1    | 35.5        | 34.7  | 34.6   | 36.0     | 34.1    |
| M27        | T12       | 35.3          | 35.5           | 35.1      | 35.1      | 35.4           | 35.3          | 35.3          | 34.7           | 35.0      | 34.8      | 34.7           | 34.9          | 34.8 | 34.7   | 34.1  | 34.6    | 35.5   | 34.9  | 35.9    | 35.1        | 34.7  | 34.7   | 34.7     | 34.5    |
| M29        | Hot water | 32.7          | 32.4           | 31.6      | 32.2      | 32.1           | 32.6          | 31.9          | 31.1           | 31.5      | 32.8      | 31.9           | 31.8          | 31.5 | 32.6   | 31.8  | 31.3    | 32.5   | 31.1  | 31.7    | 32.3        | 31.0  | 32.2   | 32.3     | 31.0    |
| M29        | T01       | 34.0          | 34.2           | 33.9      | 32.8      | 33.6           | 33.4          | 32.5          | 32.5           | 32.3      | 32.7      | 32.5           | 32.2          | 35.1 | 34.8   | 34.6  | 35.0    | 35.1   | 34.7  | 35.5    | 34.8        | 35.3  | 35.2   | 34.7     | 35.1    |
| M29        | T02       | 33.3          | 33.8           | 33.6      | 33.5      | 33.9           | 33.5          | 32.7          | 32.8           | 32.1      | 32.4      | 32.1           | 32.4          | 35.1 | 34.5   | 34.6  | 34.4    | 34.7   | 34.2  | 35.3    | 34.1        | 35.4  | 34.9   | 34.2     | 34.0    |
| M29        | T03       | 34.4          | 34.4           | 34.3      | 32.7      | 33.2           | 32.5          | 33.3          | 32.0           | 32.2      | 32.7      | 33.3           | 33.4          | 34.9 | 34.9   | 35.2  | 34.9    | 34.7   | 34.0  | 35.5    | 34.3        | 35.1  | 34.6   | 34.6     | 34.5    |
| M29        | T04a      | 35.9          | 36.0           | 36.0      | 34.5      | 35.0           | 34.8          | 33.6          | 33.4           | 32.7      | 33.3      | 33.0           | 33.6          | 34.1 | 34.7   | 33.8  | 35.2    | 35.1   | 34.1  | 35.4    | 34.5        | 34.7  | 34.0   | 34.6     | 33.8    |
| M29        | T04b      | 35.8          | 36.2           | 35.8      | 35.4      | 35.7           | 35.9          | 33.7          | 33.7           | 33.6      | 33.6      | 34.0           | 34.1          | 35.1 | 34.6   | 34.5  | 35.0    | 34.4   | 34.5  | 35.3    | 34.4        | 35.5  | 34.6   | 34.1     | 34.2    |
| M29        | T05       | 34.2          | 36.1           | 34.1      | 34.7      | 35.5           | 34.9          | 32.5          | 32.2           | 32.0      | 32.2      | 32.5           | 32.6          | 34.8 | 34.3   | 34.3  | 34.5    | 36.0   | 34.6  | 35.7    | 34.6        | 35.4  | 34.2   | 34.6     | 34.7    |
| M29        | T06       | 33.4          | 34.4           | 34.4      | 33.3      | 33.7           | 33.6          | 32.9          | 32.3           | 32.0      | 31.5      | 31.4           | 31.2          | 33.9 | 33.8   | 33.0  | 34.1    | 34.2   | 34.8  | 35.8    | 33.7        | 34.4  | 33.1   | 33.6     | 33.2    |
| M29        | T07       | 35.6          | 36.2           | 36.0      | 34.0      | 35.6           | 34.9          | 31.8          | 31.5           | 31.4      | 31.2      | 31.3           | 31.5          | 34.3 | 33.8   | 33.6  | 34.0    | 34.2   | 33.7  | 36.0    | 33.5        | 33.1  | 33.9   | 33.3     | 33.3    |
| M29        | T08       | 35.0          | 35.2           | 35.0      | 34.6      | 35.3           | 34.7          | 32.2          | 32.1           | 32.2      | 32.2      | 32.6           | 33.0          | 34.0 | 34.2   | 33.3  | 34.4    | 34.5   | 33.6  | 34.9    | 33.9        | 34.5  | 33.7   | 34.0     | 33.9    |
| M29        | T09       |               |                |           |           |                |               |               |                |           |           |                |               |      |        |       |         |        |       |         |             |       |        |          |         |



Infrared imageries of human body activated by tea match the hypothesis of meridian system

(Supplementary Table 2 Continued)

| Individual | Tea       | VR Hypothenar | VR Palm center | VR Thenar | VL Thenar | VL Palm center | VL Hypothenar | DR Hypothenar | DR Palm center | DR Thenar | DL Thenar | DL Palm center | DL Hypothenar | Lung | Spleen | Colon | Stomach | Thymus | Liver | Thyroid | Gallbladder | Heart | Kidney | Duodenum | Bladder |
|------------|-----------|---------------|----------------|-----------|-----------|----------------|---------------|---------------|----------------|-----------|-----------|----------------|---------------|------|--------|-------|---------|--------|-------|---------|-------------|-------|--------|----------|---------|
| F06        | Hot water | 32.6          | 31.7           | 31.1      | 31.3      | 32.3           | 31.8          | 32.2          | 31.5           | 31.9      | 31.9      | 31.7           | 31.5          | 31.4 | 31.1   | 32.6  | 31.1    | 31.0   | 32.2  | 32.4    | 31.0        | 32.7  | 31.8   | 32.8     | 32.4    |
| F06        | T01a      | 35.1          | 34.8           | 34.9      | 34.8      | 34.8           | 34.7          | 33.3          | 33.4           | 33.4      | 33.2      | 32.8           | 32.9          | 32.0 | 32.5   | 31.7  | 33.1    | 33.4   | 32.6  | 33.6    | 33.1        | 31.8  | 31.2   | 31.7     | 33.2    |
| F06        | T01b      | 34.6          | 34.7           | 34.7      | 34.8      | 35.0           | 34.7          | 33.8          | 33.7           | 33.7      | 33.5      | 33.2           | 33.2          | 32.9 | 33.1   | 32.4  | 33.1    | 33.8   | 33.4  | 34.8    | 34.0        | 33.3  | 31.7   | 32.9     | 34.0    |
| F06        | T02       | 34.4          | 34.4           | 34.4      | 34.7      | 34.6           | 34.8          | 33.0          | 33.0           | 33.2      | 33.0      | 33.0           | 32.6          | 31.7 | 32.0   | 31.2  | 32.4    | 33.8   | 32.3  | 34.0    | 32.3        | 31.5  | 30.6   | 31.1     | 32.4    |
| F06        | T03       | 33.2          | 33.0           | 33.0      | 33.3      | 33.2           | 33.4          | 32.9          | 33.0           | 33.2      | 33.2      | 33.3           | 32.7          | 33.0 | 32.8   | 33.5  | 33.3    | 33.2   | 32.4  | 33.2    | 33.6        | 33.2  | 32.2   | 33.5     | 33.5    |
| F06        | T04a      | 34.2          | 34.5           | 34.4      | 34.1      | 34.5           | 34.1          | 32.3          | 32.4           | 32.6      | 32.5      | 32.6           | 32.2          | 31.3 | 32.2   | 31.7  | 33.5    | 33.3   | 32.8  | 34.6    | 33.1        | 31.9  | 30.9   | 31.7     | 32.2    |
| F06        | T04b      | 34.6          | 34.9           | 34.7      | 34.7      | 34.8           | 34.8          | 33.1          | 33.2           | 33.3      | 33.3      | 33.1           | 32.8          | 31.8 | 33.1   | 32.6  | 33.7    | 34.3   | 33.4  | 34.8    | 33.3        | 32.2  | 31.9   | 32.0     | 32.7    |
| F06        | T05       | 32.5          | 33.1           | 32.3      | 32.9      | 33.5           | 32.6          | 31.3          | 31.4           | 31.9      | 31.2      | 31.2           | 30.3          | 32.3 | 32.6   | 31.4  | 32.4    | 34.1   | 32.7  | 34.7    | 31.1        | 32.9  | 31.0   | 31.4     | 33.2    |
| F06        | T06       | 34.9          | 34.7           | 35.0      | 35.1      | 35.0           | 34.9          | 33.3          | 33.4           | 33.6      | 33.7      | 33.5           | 33.1          | 32.7 | 33.0   | 31.8  | 32.6    | 34.1   | 32.6  | 35.6    | 31.0        | 32.7  | 31.0   | 31.8     | 33.1    |
| F06        | T07       | 34.8          | 34.9           | 34.9      | 35.1      | 35.0           | 35.1          | 33.7          | 33.9           | 33.8      | 33.8      | 33.8           | 33.5          | 32.8 | 33.2   | 31.9  | 33.3    | 34.3   | 33.2  | 35.6    | 32.6        | 32.2  | 31.9   | 32.6     | 33.3    |
| F06        | T08       | 35.2          | 35.0           | 35.2      | 35.4      | 35.2           | 35.4          | 33.5          | 33.7           | 33.8      | 33.6      | 33.8           | 33.2          | 32.9 | 32.8   | 32.7  | 33.8    | 34.1   | 33.4  | 34.6    | 34.0        | 33.3  | 31.3   | 33.1     | 33.6    |
| F06        | T09       | 32.8          | 33.4           | 33.0      | 32.8      | 33.3           | 32.9          | 31.5          | 32.0           | 32.2      | 32.0      | 31.8           | 31.2          | 31.6 | 32.3   | 30.6  | 32.2    | 32.8   | 32.4  | 34.6    | 31.4        | 32.1  | 30.3   | 31.5     | 32.6    |
| F06        | T10       | 33.1          | 33.7           | 33.4      | 33.6      | 33.7           | 33.6          | 31.9          | 32.2           | 32.6      | 32.4      | 32.2           | 31.7          | 31.8 | 33.0   | 31.7  | 33.0    | 34.3   | 32.5  | 34.7    | 31.4        | 32.0  | 31.1   | 32.0     | 32.7    |
| F06        | T11       | 34.8          | 35.0           | 35.2      | 35.1      | 35.1           | 35.2          | 33.1          | 33.6           | 33.7      | 33.7      | 33.8           | 33.4          | 33.0 | 33.9   | 33.2  | 34.2    | 34.4   | 33.7  | 35.1    | 33.8        | 33.3  | 32.6   | 33.4     | 34.0    |
| F06        | T12       | 34.8          | 34.7           | 34.8      | 34.8      | 35.0           | 34.8          | 32.8          | 33.1           | 33.4      | 33.1      | 33.1           | 32.8          | 31.8 | 32.5   | 31.2  | 33.3    | 33.5   | 32.1  | 34.1    | 33.0        | 31.7  | 30.5   | 31.6     | 33.1    |
| F08        | Hot water | 33.5          | 33.1           | 31.3      | 33.1      | 32.5           | 31.3          | 31.8          | 32.0           | 32.1      | 31.2      | 31.2           | 33.1          | 31.5 | 31.3   | 33.1  | 33.3    | 33.5   | 31.5  | 31.6    | 32.6        | 32.6  | 33.1   | 33.3     | 31.1    |
| F08        | T01a      | 33.9          | 35.0           | 34.7      | 34.7      | 33.9           | 33.8          | 33.1          | 33.9           | 32.9      | 32.3      | 33.3           | 32.3          | 31.7 | 33.7   | 31.9  | 33.3    | 32.8   | 33.5  | 33.3    | 33.0        | 32.2  | 31.3   | 31.9     | 32.8    |
| F08        | T01b      | 34.6          | 34.6           | 36.0      | 34.8      | 34.6           | 34.3          | 33.3          | 34.0           | 33.3      | 33.2      | 33.6           | 32.9          | 33.0 | 34.1   | 33.1  | 34.7    | 33.9   | 34.2  | 34.6    | 34.0        | 33.3  | 32.6   | 34.2     | 34.0    |
| F08        | T02       | 33.9          | 33.8           | 34.4      | 34.1      | 34.0           | 33.6          | 32.3          | 33.7           | 32.6      | 32.3      | 32.9           | 31.9          | 31.3 | 32.4   | 30.6  | 33.8    | 33.1   | 32.7  | 32.9    | 32.8        | 31.7  | 31.1   | 31.1     | 32.2    |
| F08        | T03       | 34.3          | 33.9           | 34.2      | 34.5      | 34.0           | 34.2          | 33.0          | 32.8           | 32.6      | 33.1      | 33.2           | 32.6          | 32.7 | 33.7   | 31.7  | 34.1    | 33.6   | 33.5  | 34.1    | 32.9        | 32.9  | 32.2   | 32.4     | 33.7    |
| F08        | T04a      | 33.6          | 34.2           | 34.3      | 33.8      | 34.1           | 33.5          | 32.7          | 33.4           | 32.9      | 33.0      | 33.1           | 32.6          | 33.1 | 33.6   | 32.9  | 34.8    | 33.6   | 33.8  | 33.7    | 32.3        | 33.4  | 32.3   | 33.2     | 33.4    |
| F08        | T04b      | 35.1          | 34.9           | 35.2      | 35.0      | 34.8           | 34.8          | 33.4          | 34.0           | 33.5      | 33.7      | 33.6           | 33.0          | 33.4 | 33.8   | 32.7  | 34.7    | 34.4   | 34.3  | 34.8    | 34.6        | 33.6  | 33.0   | 33.6     | 34.0    |
| F08        | T05       | 32.6          | 33.5           | 33.4      | 33.7      | 34.0           | 33.7          | 31.1          | 31.5           | 31.7      | 32.4      | 32.4           | 32.0          | 32.7 | 34.2   | 32.7  | 34.4    | 34.4   | 34.4  | 34.6    | 33.8        | 33.3  | 32.5   | 33.7     | 33.2    |
| F08        | T06       | 34.1          | 34.4           | 34.3      | 34.2      | 34.2           | 33.8          | 32.8          | 33.3           | 33.1      | 32.6      | 33.0           | 32.2          | 32.3 | 34.2   | 32.8  | 35.2    | 33.7   | 34.2  | 34.3    | 33.8        | 33.0  | 32.9   | 33.9     | 33.6    |
| F08        | T07       | 34.8          | 34.7           | 36.0      | 34.8      | 34.8           | 34.3          | 33.5          | 34.4           | 33.3      | 32.7      | 33.9           | 32.8          | 32.3 | 33.6   | 33.1  | 35.1    | 34.3   | 33.9  | 34.5    | 33.3        | 32.7  | 32.3   | 33.1     | 33.5    |
| F08        | T08       | 34.5          | 34.4           | 34.7      | 34.8      | 34.6           | 34.3          | 33.1          | 33.6           | 33.3      | 33.0      | 33.2           | 32.8          | 33.2 | 34.0   | 33.2  | 34.7    | 33.9   | 34.1  | 34.6    | 33.6        | 33.6  | 32.8   | 33.1     | 33.8    |
| F08        | T09       | 33.2          | 34.2           | 34.4      | 34.6      | 34.1           | 33.2          | 31.8          | 32.5           | 32.0      | 31.9      | 32.3           | 31.3          | 31.7 | 33.3   | 31.6  | 33.1    | 33.1   | 33.7  | 33.3    | 32.7        | 31.5  | 31.3   | 31.2     | 32.1    |
| F08        | T10       | 33.3          | 33.6           | 33.7      | 33.5      | 33.7           | 33.1          | 31.8          | 32.2           | 32.2      | 31.7      | 32.5           | 31.5          | 31.4 | 33.2   | 31.7  | 33.5    | 33.1   | 33.0  | 33.6    | 31.9        | 31.8  | 31.4   | 31.6     | 32.4    |
| F08        | T11       | 33.7          | 33.7           | 34.0      | 34.0      | 34.0           | 33.7          | 32.3          | 32.5           | 32.6      | 32.5      | 33.0           | 32.2          | 31.7 | 33.5   | 32.0  | 34.9    | 33.2   | 33.5  | 33.8    | 32.3        | 32.2  | 31.4   | 32.1     | 33.0    |
| F08        | T12       | 34.7          | 34.8           | 35.0      | 34.8      | 34.4           | 34.5          | 33.0          | 33.4           | 33.1      | 32.7      | 33.5           | 32.6          | 31.3 | 33.5   | 31.6  | 33.8    | 33.5   | 33.4  | 33.7    | 33.1        | 31.7  | 31.6   | 31.7     | 32.1    |
| F10        | Hot water | 32.6          | 32.9           | 32.5      | 31.7      | 32.7           | 32.6          | 32.2          | 32.3           | 31.7      | 31.8      | 31.6           | 32.4          | 32.8 | 33.6   | 33.5  | 31.7    | 31.9   | 33.2  | 32.2    | 33.4        | 31.5  | 33.7   | 33.2     | 31.7    |
| F10        | T01a      | 34.3          | 34.8           | 34.6      | 34.6      | 34.6           | 34.1          | 33.2          | 32.2           | 32.7      | 32.9      | 32.8           | 33.1          | 31.8 | 31.5   | 31.9  | 33.0    | 33.1   | 32.3  | 33.2    | 32.4        | 33.0  | 31.6   | 31.6     | 33.5    |
| F10        | T01b      | 34.4          | 34.9           | 34.6      | 34.6      | 34.6           | 34.0          | 33.2          | 33.7           | 33.8      | 33.8      | 33.7           | 33.5          | 32.5 | 33.3   | 32.2  | 33.4    | 32.8   | 33.6  | 34.6    | 34.0        | 33.6  | 33.4   | 33.8     | 34.5    |
| F10        | T02       | 33.1          | 33.8           | 33.6      | 33.5      | 33.7           | 33.0          | 32.1          | 32.3           | 32.3      | 32.0      | 32.2           | 32.0          | 31.2 | 32.0   | 31.6  | 32.6    | 32.7   | 32.2  | 34.3    | 33.0        | 32.0  | 31.3   | 32.3     | 33.3    |
| F10        | T03       | 33.8          | 34.0           | 34.6      | 34.4      | 34.0           | 34.0          | 32.6          | 32.3           | 32.8      | 32.5      | 32.6           | 32.4          | 31.8 | 32.3   | 31.9  | 32.9    | 31.1   | 33.1  | 33.0    | 33.0        | 32.2  | 31.1   | 31.9     | 33.2    |
| F10        | T04a      | 33.0          | 34.2           | 33.8      | 33.3      | 33.7           | 33.1          | 32.6          | 33.0           | 33.2      | 33.0      | 33.1           | 32.8          | 31.4 | 32.3   | 30.9  | 32.9    | 32.0   | 32.6  | 33.6    | 33.5        | 32.0  | 31.5   | 31.8     | 33.2    |
| F10        | T04b      | 33.8          | 34.5           | 34.3      | 34.3      | 34.4           | 34.1          | 33.5          | 33.9           | 34.0      | 33.8      | 33.8           | 33.3          | 33.7 | 34.1   | 33.6  | 34.5    | 33.9   | 34.6  | 34.0    | 34.2        | 34.2  | 33.0   | 33.7     | 34.2    |
| F10        | T05       | 32.4          | 33.7           | 33.6      | 33.8      | 33.9           | 33.2          | 31.1          | 31.7           | 31.9      | 31.6      | 31.9           | 31.4          | 30.9 | 31.8   | 30.6  | 31.0    | 32.0   | 31.7  | 34.0    | 32.1        | 31.6  | 31.1   | 31.9     | 33.5    |
| F10        | T06       | 33.3          | 34.2           | 33.9      | 33.8      | 34.1           | 33.3          | 32.6          | 32.4           | 32.9      | 32.7      | 32.5           | 32.2          | 31.2 | 33.9   | 31.3  | 32.8    | 31.9   | 33.9  | 32.8    | 33.9        | 32.0  | 32.6   | 33.3     | 34.0    |
| F10        | T07       | 33.1          | 33.5           | 33.6      | 33.4      | 33.6           | 33.1          | 32.4          | 32.3           | 32.7      | 32.5      | 32.7           | 32.3          | 32.5 | 33.7   | 31.8  | 33.1    | 32.5   | 33.8  | 33.4    | 33.6        | 32.7  | 32.7   | 33.2     | 34.1    |
| F10        | T08       | 33.1          | 34.1           | 33.8      | 33.7      | 34.0           | 33.2          | 32.9          | 33.3           | 33.4      | 33.0      | 33.0           | 32.0          | 32.7 | 33.8   | 33.1  | 34.1    | 32.9   | 33.9  | 34.6    | 35.2        | 33.2  | 32.3   | 34.6     | 33.6    |
| F10        | T09       | 33.3          | 34.9           | 33.8      | 33.8      | 34.2           | 33.3          | 31.9          | 32.6           | 33.0      | 32.6      | 32.5           | 32.4          | 31.7 | 32.5   | 31.0  | 32.9    | 31.6   | 32.8  | 34.6    | 32.3        | 32.7  | 31.5   | 32.3     | 33.7    |
| F10        | T10       | 33.1          | 33.9           | 34.0      | 34.0      | 34.1           | 33.6          | 32.6          | 32.5           | 33.0      | 32.6      | 33.1           | 32.6          | 31.7 | 33.2   | 33.0  | 33.2    | 33.1   | 33.4  | 33.7    | 32.2        | 33.2  | 32.4   | 32.9     | 34.1    |
| F10        | T11       | 34.0          | 34.1           | 34.4      | 34.3      | 33.9           | 33.6          | 32.6          | 32.0           | 32.7      | 32.4      | 32.4           | 32.2          | 31.1 | 32.3   | 31.0  | 33.7    | 32.2   | 33.2  | 32.3    | 32.5        | 31.8  | 31.9   | 32.3     | 33.8    |
| F10        | T12       | 33.2          | 33.9           | 34.2      | 34.4      | 34.1           | 33.9          | 32.4          | 31.9           | 32.6      | 32.5      | 32.0           | 32.6          | 31.5 | 32.5   | 31.9  | 32.9    | 31.4   | 32.6  | 33.2    | 33.6        | 31.3  | 31.2   | 31.9     | 33.2    |
| F12        | T01a      | 32.3          | 33.3           | 33.1      | 33.1      | 33.6           | 33.1          | 32.3          | 32.8           | 32.8      | 32.9      | 33.0           | 32.9          | 32.8 | 33.5   | 32.3  | 33.6    | 32.2   | 33.7  | 33.6    | 33.4        | 33.3  | 33.0   | 34.4     | 34.3    |
| F12        | T01b      | 33.7          | 33.9           | 34.1      | 34.0      | 34.2           | 34.0          | 32.1          | 32.2           | 31.9      | 32.6      | 32.4           | 32.4          | 32.4 | 30.9   | 33.4  | 29.8    | 32.2   | 32.2  | 31.1    | 33.6        | 30.7  | 31.9   | 30.3     | 32.9    |
| F12        | T02       | 34.0          | 33.9           | 33.7      | 34.3      | 34.0           | 34.3          | 32.3          | 32.5           | 32.5      | 32.7      | 32.3           | 32.2          | 31.0 | 32.0   | 30.7  | 33.0    | 31.1   | 31.8  | 33.1    | 32.3        | 31.4  | 30.3   | 31.1     | 30.9    |
| F12        | T05       | 33.6          | 33.9           | 33.7      | 33.7      | 34.1           | 33.4          | 31.7          | 32.2           | 32.3      | 32.1      | 32.5           | 32.0          | 31.7 | 33.3   | 31.8  | 33.8    | 32.3   | 31.7  | 34.0    | 33.1        | 32.3  | 31.0   | 31.9     | 33.1    |
| F12        | T06       | 33.7          | 34.2           | 33.1      | 33.3      | 33.8           | 33.5          | 33.3          | 33.2           | 32.8      | 32.9      | 32.8           | 32.9          | 32.0 | 34.1   | 32.0  | 34.1    | 32.5   | 34.6  | 32.4    | 34.8        | 32.7  | 32.4   | 32.1     | 33.9    |
| F12        | T07       | 33.7          | 34.2           | 33.9      | 33.9      | 34.0           | 33.9          | 32.3          | 33.0           | 32.3      | 32.6      | 32.2           | 32.3          | 30.5 | 33.5   | 31.4  | 33.7    | 32.3   | 32.5  | 32.9    | 32.5        | 31.7  | 30.8   | 31.9     | 32.7    |
| F12</      |           |               |                |           |           |                |               |               |                |           |           |                |               |      |        |       |         |        |       |         |             |       |        |          |         |

Infrared imageries of human body activated by tea match the hypothesis of meridian system

(Supplementary Table 2 Continued)

| Individual | Tea       | VR Hypothenar | VR Palm center | VR Thenar | VL Thenar | VL Palm center | VL Hypothenar | DR Hypothenar | DR Palm center | DR Thenar | DL Thenar | DL Palm center | DL Hypothenar | Lung | Spleen | Colon | Stomach | Thymus | Liver | Thyroid | Gallbladder | Heart | Kidney | Duodenum | Bladder |      |      |
|------------|-----------|---------------|----------------|-----------|-----------|----------------|---------------|---------------|----------------|-----------|-----------|----------------|---------------|------|--------|-------|---------|--------|-------|---------|-------------|-------|--------|----------|---------|------|------|
| F20        | T03       | 34.6          | 34.5           | 34.6      | 34.7      | 34.2           | 34.4          | 33.4          | 33.6           | 33.5      | 33.3      | 33.2           | 33.2          | 32.9 | 33.1   | 32.9  | 32.7    | 34.3   | 32.9  | 33.4    | 33.8        | 32.9  | 32.8   | 31.6     | 32.9    | 33.6 |      |
| F20        | T04a      | 33.8          | 33.5           | 34.1      | 33.8      | 33.6           | 33.6          | 33.0          | 33.3           | 32.9      | 33.1      | 32.9           | 33.1          | 32.9 | 33.1   | 32.5  | 33.1    | 32.6   | 33.5  | 32.0    | 33.4        | 32.7  | 33.0   | 33.2     | 31.6    | 32.0 | 33.9 |
| F20        | T04b      | 34.1          | 33.9           | 34.5      | 34.4      | 33.9           | 34.1          | 33.4          | 33.6           | 33.4      | 33.7      | 33.5           | 33.4          | 32.0 | 32.9   | 32.0  | 33.1    | 32.2   | 33.6  | 32.7    | 34.0        | 32.8  | 31.4   | 30.9     | 33.3    | 34.7 |      |
| F20        | T05       | 33.5          | 34.1           | 34.1      | 33.5      | 33.5           | 33.5          | 34.9          | 34.7           | 34.8      | 34.9      | 34.8           | 34.4          | 32.3 | 35.0   | 32.5  | 35.2    | 33.5   | 34.7  | 34.6    | 34.1        | 33.2  | 31.8   | 34.3     | 34.7    | 34.7 |      |
| F20        | T06       | 35.1          | 34.9           | 35.1      | 35.3      | 35.0           | 34.8          | 34.1          | 34.4           | 34.3      | 33.6      | 34.0           | 34.0          | 32.4 | 34.8   | 31.9  | 35.2    | 33.5   | 35.2  | 34.4    | 34.6        | 32.9  | 30.9   | 33.9     | 34.0    | 34.0 |      |
| F20        | T07       | 35.7          | 35.3           | 35.4      | 35.3      | 35.0           | 35.0          | 33.1          | 34.2           | 34.0      | 33.6      | 34.1           | 33.9          | 32.4 | 34.7   | 32.6  | 35.0    | 33.3   | 34.6  | 34.3    | 35.3        | 33.5  | 31.7   | 33.7     | 34.3    | 34.3 |      |
| F20        | T08       | 35.5          | 35.3           | 35.7      | 35.8      | 35.3           | 35.5          | 34.1          | 33.9           | 33.8      | 33.7      | 33.4           | 33.4          | 32.6 | 34.2   | 33.1  | 34.8    | 32.9   | 35.6  | 33.9    | 34.3        | 33.5  | 31.7   | 32.6     | 34.6    | 34.6 |      |
| F20        | T09       | 34.2          | 34.3           | 34.4      | 34.1      | 34.2           | 33.8          | 33.2          | 33.6           | 33.6      | 32.9      | 33.0           | 32.9          | 32.0 | 34.0   | 31.8  | 34.4    | 33.0   | 33.9  | 34.0    | 34.6        | 32.7  | 31.8   | 33.4     | 34.6    | 34.6 |      |
| F20        | T10       | 35.0          | 34.5           | 35.2      | 35.2      | 34.5           | 35.2          | 33.1          | 34.1           | 34.2      | 33.8      | 33.4           | 33.3          | 32.6 | 34.5   | 32.6  | 34.3    | 32.7   | 35.0  | 34.3    | 35.2        | 33.4  | 31.5   | 32.8     | 34.2    | 34.2 |      |
| F20        | T11       | 34.9          | 34.3           | 35.0      | 35.0      | 34.3           | 34.5          | 33.1          | 33.4           | 33.0      | 33.1      | 33.2           | 33.2          | 32.1 | 33.7   | 32.4  | 34.0    | 32.2   | 34.3  | 33.5    | 33.4        | 32.8  | 30.8   | 32.0     | 33.5    | 34.6 |      |
| F20        | T12       | 35.1          | 34.6           | 35.4      | 35.4      | 35.1           | 35.3          | 33.3          | 34.3           | 34.1      | 33.4      | 33.9           | 33.9          | 32.7 | 34.0   | 32.6  | 34.3    | 33.4   | 34.2  | 34.3    | 33.9        | 33.1  | 31.7   | 32.5     | 33.8    | 34.6 |      |
| F22        | Hot water | 31.4          | 30.8           | 31.4      | 31.2      | 30.2           | 30.0          | 30.4          | 30.1           | 31.4      | 29.7      | 31.5           | 31.3          | 31.1 | 29.8   | 29.5  | 31.8    | 30.7   | 29.7  | 31.5    | 31.3        | 30.4  | 31.7   | 30.8     | 29.7    | 29.7 |      |
| F22        | T01a      | 31.9          | 32.4           | 32.6      | 32.6      | 33.1           | 32.5          | 30.5          | 31.5           | 30.3      | 30.8      | 31.6           | 30.2          | 31.2 | 30.4   | 28.9  | 29.9    | 32.1   | 28.9  | 32.4    | 30.5        | 30.4  | 28.4   | 28.4     | 31.9    | 31.9 |      |
| F22        | T01b      | 32.3          | 33.3           | 33.3      | 33.3      | 33.8           | 33.0          | 31.6          | 32.1           | 31.7      | 31.9      | 32.2           | 31.6          | 31.9 | 31.0   | 31.4  | 32.1    | 32.6   | 30.6  | 32.5    | 30.7        | 31.8  | 30.8   | 31.5     | 32.7    | 32.7 |      |
| F22        | T02       | 31.1          | 33.1           | 33.4      | 32.9      | 33.3           | 32.3          | 31.1          | 31.9           | 31.3      | 31.3      | 31.1           | 30.5          | 30.9 | 29.3   | 29.2  | 31.3    | 32.8   | 29.0  | 32.9    | 31.1        | 31.0  | 29.4   | 29.0     | 32.3    | 32.3 |      |
| F22        | T03       | 33.0          | 33.2           | 33.6      | 33.4      | 33.6           | 33.1          | 31.7          | 32.3           | 31.5      | 31.5      | 31.5           | 31.2          | 30.5 | 29.8   | 31.2  | 31.5    | 32.8   | 29.5  | 32.7    | 31.9        | 31.6  | 30.1   | 30.8     | 32.0    | 32.0 |      |
| F22        | T04a      | 32.3          | 33.6           | 33.4      | 33.4      | 33.8           | 33.0          | 32.6          | 30.8           | 32.0      | 31.4      | 31.9           | 31.9          | 31.3 | 31.7   | 33.6  | 30.6    | 32.5   | 33.1  | 31.8    | 33.0        | 32.3  | 31.6   | 30.0     | 31.1    | 31.9 |      |
| F22        | T04b      | 33.6          | 33.5           | 34.0      | 33.9      | 33.7           | 33.4          | 32.5          | 32.8           | 32.4      | 32.7      | 32.8           | 32.2          | 33.1 | 32.3   | 32.9  | 32.9    | 33.9   | 32.4  | 33.2    | 32.4        | 32.4  | 31.3   | 32.4     | 32.8    | 32.8 |      |
| F22        | T05       | 31.4          | 32.8           | 32.8      | 32.7      | 33.2           | 31.9          | 30.8          | 31.6           | 31.7      | 31.6      | 31.8           | 31.0          | 30.7 | 29.7   | 31.3  | 31.6    | 33.0   | 30.5  | 33.0    | 30.1        | 31.6  | 29.6   | 30.5     | 32.7    | 32.7 |      |
| F22        | T06       | 31.1          | 32.7           | 32.3      | 32.6      | 33.1           | 32.2          | 30.0          | 30.8           | 30.4      | 30.6      | 30.5           | 30.2          | 30.9 | 30.6   | 29.8  | 31.2    | 31.6   | 30.1  | 32.9    | 30.4        | 30.9  | 29.2   | 31.4     | 32.7    | 32.7 |      |
| F22        | T07       | 31.7          | 32.2           | 31.9      | 31.9      | 32.3           | 31.8          | 32.6          | 33.3           | 33.3      | 33.8      | 34.0           | 33.5          | 31.9 | 31.1   | 31.4  | 31.4    | 31.6   | 30.8  | 32.9    | 32.2        | 31.9  | 30.4   | 31.0     | 33.2    | 33.2 |      |
| F22        | T08       | 33.1          | 33.9           | 33.8      | 33.9      | 34.2           | 33.4          | 32.5          | 33.0           | 32.3      | 32.7      | 32.9           | 32.4          | 33.0 | 32.4   | 32.7  | 32.8    | 33.3   | 31.4  | 33.4    | 34.6        | 32.0  | 31.1   | 31.5     | 33.5    | 33.5 |      |
| F22        | T09       | 32.1          | 32.5           | 32.2      | 32.5      | 33.1           | 31.7          | 30.5          | 30.7           | 30.7      | 30.9      | 31.0           | 30.4          | 30.7 | 28.8   | 31.2  | 31.4    | 32.8   | 29.8  | 32.1    | 29.5        | 31.0  | 30.3   | 28.6     | 32.6    | 32.6 |      |
| F22        | T10       | 31.0          | 31.7           | 31.7      | 32.0      | 32.4           | 31.6          | 29.3          | 29.9           | 29.9      | 30.2      | 29.5           | 29.2          | 30.1 | 31.9   | 29.7  | 31.5    | 32.9   | 30.5  | 33.0    | 30.0        | 31.1  | 29.5   | 29.3     | 32.4    | 32.4 |      |
| F22        | T11       | 32.5          | 33.2           | 33.0      | 33.1      | 33.4           | 32.6          | 30.4          | 30.5           | 30.6      | 30.6      | 30.5           | 30.6          | 31.9 | 32.6   | 32.2  | 31.6    | 33.7   | 28.5  | 32.8    | 29.5        | 32.4  | 30.5   | 28.7     | 31.8    | 31.8 |      |
| F22        | T12       | 32.2          | 33.1           | 33.1      | 33.5      | 33.3           | 32.4          | 30.8          | 31.1           | 30.8      | 31.1      | 31.1           | 31.1          | 31.4 | 30.1   | 31.7  | 32.5    | 33.0   | 30.7  | 32.6    | 30.4        | 32.0  | 30.3   | 28.3     | 32.3    | 32.3 |      |
| F24        | Hot water | 31.8          | 30.3           | 32.6      | 32.7      | 31.2           | 31.8          | 31.7          | 32.4           | 31.7      | 31.8      | 30.3           | 31.3          | 31.9 | 29.9   | 29.9  | 31.0    | 32.1   | 31.4  | 30.0    | 31.8        | 31.4  | 30.1   | 31.2     | 30.8    | 30.8 |      |
| F24        | T01a      | 33.6          | 34.4           | 34.1      | 33.6      | 33.9           | 33.7          | 31.9          | 31.8           | 32.5      | 32.3      | 32.0           | 32.2          | 32.3 | 33.0   | 31.7  | 32.3    | 33.4   | 32.8  | 33.2    | 33.0        | 33.0  | 32.1   | 31.6     | 33.3    | 33.3 |      |
| F24        | T01b      | 33.5          | 34.5           | 34.1      | 34.0      | 34.6           | 34.0          | 32.3          | 32.5           | 32.5      | 32.4      | 32.2           | 32.2          | 32.4 | 32.6   | 33.1  | 31.2    | 33.0   | 34.0  | 32.8    | 33.1        | 33.0  | 33.3   | 31.6     | 31.8    | 33.0 |      |
| F24        | T02       | 32.8          | 33.9           | 33.7      | 33.6      | 33.9           | 33.6          | 31.3          | 31.8           | 32.4      | 32.3      | 31.9           | 32.1          | 32.5 | 32.5   | 31.4  | 32.9    | 34.0   | 32.8  | 33.9    | 32.9        | 33.0  | 32.1   | 31.7     | 32.8    | 32.8 |      |
| F24        | T03       | 34.6          | 34.6           | 34.3      | 34.3      | 34.2           | 34.4          | 32.9          | 32.9           | 33.1      | 33.1      | 33.1           | 33.2          | 32.8 | 34.0   | 32.7  | 33.8    | 34.1   | 34.2  | 33.6    | 33.6        | 33.9  | 32.7   | 31.9     | 34.1    | 34.1 |      |
| F24        | T04a      | 34.7          | 34.5           | 34.4      | 33.8      | 34.4           | 34.1          | 32.3          | 32.5           | 32.3      | 32.2      | 32.3           | 32.1          | 30.8 | 32.4   | 31.2  | 31.4    | 33.3   | 32.4  | 34.0    | 31.9        | 32.2  | 30.7   | 30.8     | 32.4    | 32.4 |      |
| F24        | T04b      | 35.1          | 35.3           | 35.2      | 34.6      | 34.8           | 34.6          | 33.4          | 34.0           | 33.6      | 33.6      | 33.7           | 33.1          | 32.8 | 33.5   | 32.0  | 33.2    | 34.3   | 34.3  | 33.9    | 33.3        | 33.7  | 32.3   | 32.5     | 33.6    | 33.6 |      |
| F24        | T05       | 32.8          | 34.0           | 33.5      | 33.8      | 34.3           | 33.5          | 32.6          | 32.8           | 33.4      | 33.2      | 33.0           | 32.6          | 33.1 | 34.7   | 33.0  | 34.4    | 34.8   | 33.3  | 34.9    | 34.6        | 34.1  | 32.9   | 32.5     | 33.6    | 33.6 |      |
| F24        | T06       | 33.8          | 34.6           | 34.6      | 33.6      | 34.2           | 33.4          | 31.7          | 31.9           | 32.4      | 32.0      | 32.2           | 31.9          | 32.3 | 32.3   | 30.7  | 31.9    | 33.9   | 32.7  | 33.6    | 32.4        | 32.9  | 31.6   | 30.5     | 32.8    | 32.8 |      |
| F24        | T07       | 34.7          | 35.2           | 34.8      | 34.2      | 34.2           | 34.0          | 33.2          | 33.3           | 33.4      | 33.4      | 33.4           | 33.3          | 33.2 | 33.8   | 33.6  | 32.9    | 33.9   | 33.7  | 33.9    | 33.8        | 33.9  | 32.3   | 33.3     | 33.3    | 33.3 |      |
| F24        | T08       | 34.4          | 34.7           | 34.6      | 34.5      | 34.6           | 34.6          | 32.8          | 32.8           | 33.2      | 32.5      | 32.6           | 32.7          | 33.0 | 33.9   | 33.7  | 33.4    | 34.4   | 34.1  | 33.3    | 33.8        | 34.1  | 32.6   | 32.0     | 33.9    | 33.9 |      |
| F24        | T09       | 29.9          | 31.3           | 31.4      | 31.1      | 31.9           | 30.6          | 29.9          | 30.2           | 30.7      | 30.8      | 30.6           | 29.6          | 32.4 | 33.1   | 31.6  | 33.1    | 33.8   | 32.3  | 33.9    | 32.9        | 33.0  | 30.5   | 30.9     | 32.9    | 32.9 |      |
| F24        | T10       | 30.6          | 32.7           | 32.5      | 31.1      | 31.5           | 30.1          | 30.0          | 30.4           | 31.5      | 29.9      | 29.5           | 29.5          | 32.3 | 32.5   | 30.8  | 31.4    | 33.7   | 32.6  | 33.4    | 32.8        | 32.8  | 32.2   | 30.3     | 33.0    | 33.0 |      |
| F24        | T11       | 34.2          | 34.6           | 34.3      | 34.0      | 34.2           | 34.2          | 32.6          | 32.7           | 33.0      | 33.0      | 32.7           | 32.7          | 33.1 | 32.5   | 33.1  | 32.9    | 34.1   | 34.0  | 33.7    | 33.4        | 33.6  | 32.2   | 32.5     | 33.4    | 33.4 |      |
| F24        | T12       | 33.6          | 34.0           | 33.9      | 34.1      | 34.0           | 33.7          | 31.7          | 31.9           | 32.0      | 32.6      | 32.2           | 32.4          | 32.0 | 32.2   | 32.9  | 33.2    | 33.8   | 33.5  | 33.7    | 33.0        | 32.7  | 32.1   | 32.3     | 33.7    | 33.7 |      |
| F26        | Hot water | 30.7          | 30.6           | 30.5      | 31.6      | 30.2           | 30.2          | 30.1          | 29.6           | 31.0      | 31.8      | 31.7           | 30.1          | 31.1 | 30.9   | 31.0  | 29.9    | 30.6   | 30.3  | 29.7    | 31.7        | 31.5  | 31.3   | 30.0     | 30.4    | 30.4 |      |
| F26        | T01a      | 32.9          | 33.4           | 33.1      | 33.3      | 33.4           | 33.2          | 31.7          | 32.0           | 31.9      | 32.1      | 32.0           | 31.9          | 31.2 | 30.8   | 32.6  | 32.3    | 31.2   | 29.8  | 32.9    | 31.2        | 33.0  | 31.2   | 29.1     | 33.3    | 33.3 |      |
| F26        | T01b      | 34.1          | 34.4           | 34.3      | 34.3      | 34.3           | 34.2          | 32.5          | 32.7           | 32.6      | 32.6      | 33.0           | 32.7          | 32.2 | 33.2   | 31.3  | 34.0    | 32.6   | 33.1  | 33.9    | 33.2        | 32.5  | 32.1   | 33.4     |         |      |      |

Infrared imageries of human body activated by tea match the hypothesis of meridian system

(Supplementary Table 2 Continued)

| Individual | Tea       | VR Hypothenar | VR Palm center | VR Thienar | VL Thienar | VL Palm center | VL Hypothenar | DR Hypothenar | DR Palm center | DR Thienar | DL Thienar | DL Palm center | DL Hypothenar | Lung | Spleen | Colon | Stomach | Thymus | Liver | Thyroid | Gallbladder | Heart | Kidney | Duodenum | Bladder |
|------------|-----------|---------------|----------------|------------|------------|----------------|---------------|---------------|----------------|------------|------------|----------------|---------------|------|--------|-------|---------|--------|-------|---------|-------------|-------|--------|----------|---------|
| F32        | Hot water | 32.0          | 33.2           | 32.5       | 32.7       | 32.3           | 33.4          | 32.6          | 33.8           | 32.2       | 32.3       | 34.3           | 33.2          | 32.5 | 33.3   | 33.7  | 33.4    | 33.7   | 32.8  | 33.3    | 32.4        | 34.2  | 33.6   | 33.7     | 33.5    |
| F32        | T01a      | 34.6          | 34.9           | 34.3       | 34.3       | 34.5           | 34.5          | 32.8          | 32.5           | 32.9       | 33.0       | 32.6           | 32.7          | 33.2 | 34.1   | 33.0  | 34.1    | 33.8   | 33.6  | 34.2    | 33.8        | 34.2  | 33.1   | 33.5     | 33.4    |
| F32        | T01b      | 35.2          | 35.5           | 35.1       | 35.2       | 35.4           | 35.5          | 33.6          | 33.6           | 33.5       | 33.8       | 33.6           | 33.6          | 33.3 | 35.2   | 34.3  | 34.8    | 34.1   | 34.6  | 34.7    | 34.8        | 34.7  | 34.3   | 33.8     | 34.6    |
| F32        | T02       | 34.1          | 34.7           | 37.0       | 33.9       | 34.0           | 34.1          | 32.2          | 32.3           | 32.8       | 33.0       | 32.5           | 32.4          | 33.4 | 34.5   | 34.3  | 34.7    | 34.2   | 34.4  | 35.0    | 34.2        | 34.5  | 33.8   | 34.1     | 34.4    |
| F32        | T03       | 34.5          | 34.7           | 34.3       | 34.5       | 34.7           | 34.6          | 33.6          | 33.3           | 34.0       | 33.7       | 33.5           | 33.6          | 33.6 | 34.8   | 33.7  | 34.1    | 33.9   | 34.4  | 34.8    | 34.4        | 34.1  | 33.3   | 33.2     | 33.7    |
| F32        | T04a      | 35.1          | 35.4           | 34.9       | 35.1       | 35.0           | 35.3          | 33.1          | 33.0           | 33.3       | 33.4       | 33.1           | 33.0          | 32.3 | 33.8   | 33.5  | 33.7    | 33.2   | 33.6  | 34.2    | 33.5        | 34.0  | 32.4   | 33.0     | 33.4    |
| F32        | T06       | 33.3          | 33.9           | 33.1       | 33.4       | 33.9           | 33.2          | 32.0          | 32.0           | 32.8       | 32.5       | 32.4           | 31.8          | 34.2 | 35.1   | 34.7  | 35.1    | 34.7   | 35.0  | 35.2    | 35.0        | 34.6  | 34.1   | 34.5     | 34.5    |
| F32        | T07       | 34.9          | 34.9           | 34.7       | 34.8       | 35.2           | 35.0          | 33.5          | 33.2           | 33.1       | 33.2       | 33.0           | 33.0          | 32.7 | 34.2   | 32.9  | 34.1    | 33.7   | 34.2  | 34.0    | 33.8        | 34.2  | 32.8   | 33.3     | 33.9    |
| F32        | T08       | 34.8          | 35.0           | 34.9       | 34.6       | 34.8           | 34.6          | 33.8          | 33.9           | 34.4       | 34.0       | 33.7           | 33.6          | 34.2 | 35.4   | 34.5  | 35.2    | 34.6   | 34.8  | 35.2    | 35.3        | 34.8  | 34.2   | 35.2     | 34.5    |
| F32        | T09       | 34.5          | 35.3           | 34.9       | 34.6       | 35.0           | 34.8          | 33.5          | 33.7           | 33.9       | 34.0       | 33.8           | 34.1          | 34.3 | 34.5   | 33.8  | 35.1    | 35.5   | 33.9  | 35.8    | 34.3        | 35.1  | 33.7   | 34.6     | 34.6    |
| F32        | T10       | 34.8          | 35.2           | 34.6       | 34.8       | 35.0           | 34.9          | 32.8          | 33.0           | 33.2       | 33.3       | 33.0           | 32.7          | 33.1 | 34.1   | 33.1  | 34.1    | 34.4   | 33.2  | 34.3    | 33.6        | 34.2  | 33.3   | 33.9     | 33.7    |
| F34        | Hot water | 32.2          | 32.7           | 31.4       | 31.9       | 32.6           | 32.5          | 31.0          | 33.2           | 31.1       | 33.3       | 31.9           | 32.0          | 31.9 | 31.6   | 32.9  | 32.4    | 32.7   | 31.6  | 32.5    | 33.0        | 32.7  | 31.9   | 30.9     | 32.0    |
| F34        | T01a      | 35.0          | 34.8           | 34.5       | 35.0       | 34.7           | 35.1          | 33.8          | 33.4           | 33.0       | 33.9       | 33.8           | 33.6          | 33.4 | 33.9   | 33.3  | 33.9    | 33.6   | 34.3  | 34.9    | 33.9        | 33.3  | 32.1   | 33.2     | 33.6    |
| F34        | T01b      | 35.5          | 35.2           | 35.0       | 35.3       | 35.0           | 35.5          | 33.6          | 33.4           | 32.5       | 32.8       | 33.5           | 33.8          | 32.4 | 34.2   | 31.2  | 34.4    | 33.7   | 34.6  | 34.6    | 33.8        | 32.1  | 30.9   | 33.3     | 32.4    |
| F34        | T02       | 35.1          | 35.1           | 34.4       | 34.7       | 34.9           | 35.3          | 33.8          | 33.4           | 33.5       | 33.3       | 33.6           | 33.7          | 32.0 | 33.9   | 31.6  | 34.0    | 32.6   | 33.8  | 34.4    | 34.1        | 31.9  | 31.7   | 32.8     | 33.3    |
| F34        | T03       | 35.1          | 34.8           | 34.5       | 34.9       | 34.5           | 35.2          | 33.8          | 33.6           | 33.1       | 33.4       | 33.4           | 33.9          | 32.9 | 33.6   | 31.8  | 33.9    | 33.2   | 32.4  | 33.4    | 34.0        | 33.0  | 31.7   | 33.2     | 33.5    |
| F34        | T04a      | 35.4          | 35.1           | 35.0       | 34.9       | 34.6           | 35.2          | 33.5          | 33.1           | 32.6       | 32.7       | 33.1           | 33.1          | 31.0 | 33.7   | 33.1  | 33.8    | 33.4   | 34.0  | 33.2    | 34.3        | 31.1  | 30.7   | 33.0     | 33.1    |
| F34        | T04b      | 35.6          | 35.1           | 35.3       | 35.1       | 35.1           | 35.5          | 33.9          | 34.0           | 33.7       | 34.0       | 33.9           | 34.0          | 33.9 | 34.3   | 34.6  | 35.0    | 34.6   | 35.1  | 34.1    | 34.7        | 34.7  | 32.8   | 34.6     | 33.9    |
| F34        | T05       | 34.7          | 34.7           | 34.4       | 34.7       | 34.4           | 34.6          | 33.2          | 32.9           | 32.8       | 33.0       | 33.1           | 33.0          | 33.6 | 34.5   | 34.8  | 34.8    | 33.4   | 34.4  | 34.4    | 34.8        | 33.3  | 31.7   | 32.8     | 33.6    |
| F34        | T06       | 34.4          | 33.9           | 34.6       | 34.5       | 34.3           | 34.7          | 32.2          | 32.2           | 32.4       | 32.3       | 32.3           | 32.7          | 32.8 | 34.5   | 32.5  | 34.5    | 33.2   | 32.8  | 33.5    | 33.8        | 33.1  | 32.0   | 33.4     | 33.7    |
| F34        | T07       | 35.6          | 35.3           | 35.2       | 35.3       | 34.9           | 35.4          | 33.8          | 33.1           | 32.7       | 33.1       | 33.3           | 33.8          | 32.1 | 34.2   | 32.5  | 34.3    | 34.0   | 34.3  | 33.7    | 34.4        | 32.8  | 31.6   | 32.4     | 34.1    |
| F34        | T08       | 34.3          | 34.6           | 33.8       | 33.9       | 34.2           | 34.3          | 34.0          | 33.1           | 32.9       | 32.9       | 33.2           | 33.4          | 33.4 | 35.5   | 35.0  | 35.8    | 33.9   | 34.9  | 34.1    | 35.2        | 33.3  | 32.5   | 34.2     | 34.2    |
| F34        | T09       | 34.4          | 35.1           | 34.8       | 34.4       | 34.7           | 34.4          | 33.1          | 33.0           | 33.2       | 33.2       | 33.3           | 32.9          | 33.4 | 34.8   | 34.2  | 34.7    | 33.1   | 34.7  | 33.6    | 34.7        | 33.5  | 31.4   | 33.1     | 33.3    |
| F34        | T10       | 33.8          | 34.4           | 33.6       | 33.9       | 34.1           | 34.2          | 32.7          | 32.8           | 32.4       | 32.7       | 32.9           | 32.8          | 33.0 | 33.7   | 32.9  | 33.9    | 33.2   | 33.8  | 33.2    | 33.5        | 32.6  | 32.0   | 33.4     | 33.3    |
| F34        | T11       | 35.3          | 35.2           | 35.0       | 35.0       | 34.8           | 35.4          | 33.6          | 33.8           | 32.8       | 33.1       | 33.3           | 33.8          | 33.0 | 33.5   | 32.1  | 34.4    | 33.2   | 33.9  | 34.8    | 33.6        | 33.0  | 31.8   | 33.2     | 33.7    |
| F34        | T12       | 35.5          | 35.1           | 35.1       | 35.2       | 35.0           | 35.5          | 34.2          | 33.5           | 33.2       | 33.3       | 33.8           | 33.9          | 32.4 | 33.3   | 33.4  | 34.0    | 33.6   | 33.8  | 34.9    | 34.0        | 32.5  | 31.6   | 33.3     | 32.8    |
| F36        | Hot water | 32.1          | 31.0           | 33.2       | 31.7       | 33.2           | 32.0          | 32.3          | 32.9           | 31.7       | 32.5       | 31.3           | 32.1          | 31.0 | 31.2   | 32.6  | 32.9    | 33.0   | 33.0  | 31.0    | 31.6        | 33.3  | 31.1   | 32.7     | 31.1    |
| F36        | T01a      | 33.5          | 33.9           | 33.3       | 33.1       | 33.6           | 33.4          | 32.6          | 32.8           | 32.9       | 32.5       | 33.0           | 32.6          | 32.2 | 33.9   | 33.2  | 33.2    | 33.6   | 34.3  | 34.1    | 33.8        | 33.3  | 31.8   | 33.3     | 32.8    |
| F36        | T01b      | 34.6          | 35.1           | 34.3       | 34.0       | 34.9           | 34.6          | 32.5          | 32.9           | 32.7       | 32.7       | 33.1           | 32.7          | 32.6 | 33.9   | 33.3  | 33.6    | 33.9   | 33.4  | 34.8    | 33.9        | 33.4  | 31.7   | 33.2     | 32.1    |
| F36        | T02       | 32.7          | 33.5           | 33.0       | 33.0       | 33.9           | 33.0          | 32.2          | 32.6           | 32.7       | 32.8       | 32.7           | 32.2          | 32.7 | 33.7   | 32.9  | 33.3    | 33.8   | 32.3  | 34.1    | 34.3        | 33.7  | 32.3   | 33.6     | 33.4    |
| F36        | T03       | 33.8          | 34.4           | 33.7       | 33.8       | 33.8           | 33.9          | 32.2          | 32.2           | 32.3       | 32.2       | 32.4           | 32.0          | 33.6 | 34.3   | 34.5  | 33.5    | 33.8   | 34.7  | 34.5    | 34.2        | 34.4  | 32.9   | 33.6     | 33.3    |
| F36        | T04a      | 34.3          | 35.0           | 34.0       | 34.1       | 34.9           | 34.4          | 33.5          | 33.7           | 33.3       | 33.1       | 33.8           | 33.2          | 33.0 | 34.0   | 33.5  | 33.5    | 33.8   | 33.9  | 34.3    | 33.7        | 33.6  | 31.9   | 33.6     | 32.9    |
| F36        | T04b      | 34.8          | 34.9           | 34.9       | 34.9       | 35.0           | 35.0          | 33.4          | 33.5           | 33.5       | 33.7       | 33.8           | 33.1          | 33.0 | 33.8   | 33.7  | 33.4    | 34.0   | 33.9  | 34.6    | 33.8        | 33.8  | 31.7   | 33.8     | 32.8    |
| F36        | T05       | 33.3          | 34.1           | 33.2       | 33.8       | 34.0           | 33.0          | 33.0          | 33.1           | 33.1       | 33.1       | 33.2           | 32.8          | 33.8 | 34.9   | 34.3  | 33.8    | 33.6   | 32.0  | 34.5    | 34.6        | 34.9  | 32.3   | 33.7     | 33.4    |
| F36        | T06       | 33.3          | 34.3           | 33.5       | 33.7       | 34.5           | 34.0          | 32.9          | 32.7           | 32.8       | 33.1       | 33.2           | 33.1          | 33.9 | 35.4   | 34.6  | 34.4    | 33.9   | 34.4  | 34.6    | 35.3        | 35.0  | 32.8   | 33.6     | 33.9    |
| F36        | T07       | 33.3          | 34.0           | 33.4       | 33.7       | 34.1           | 33.4          | 31.6          | 32.0           | 32.3       | 32.3       | 32.2           | 31.8          | 32.5 | 33.9   | 33.6  | 33.5    | 33.9   | 34.3  | 34.4    | 33.7        | 33.6  | 32.3   | 33.9     | 32.2    |
| F36        | T08       | 34.5          | 34.9           | 34.4       | 34.1       | 34.8           | 34.8          | 33.4          | 33.6           | 33.3       | 33.6       | 33.8           | 33.3          | 32.9 | 34.8   | 32.5  | 33.6    | 33.7   | 34.5  | 34.5    | 34.5        | 33.7  | 32.4   | 33.5     | 32.5    |
| F36        | T09       | 32.5          | 33.7           | 32.9       | 33.1       | 34.0           | 32.8          | 31.0          | 31.4           | 31.5       | 31.4       | 31.6           | 30.8          | 31.9 | 32.8   | 32.6  | 32.4    | 33.6   | 33.8  | 34.3    | 32.8        | 33.0  | 31.7   | 33.3     | 31.9    |
| F36        | T10       | 32.0          | 33.8           | 32.6       | 32.6       | 33.8           | 32.5          | 31.8          | 32.1           | 32.2       | 31.9       | 31.7           | 31.2          | 33.1 | 33.2   | 33.1  | 33.7    | 34.4   | 34.8  | 34.5    | 33.8        | 33.6  | 31.9   | 34.1     | 33.9    |
| F36        | T11       | 33.0          | 34.3           | 33.7       | 33.7       | 34.4           | 33.3          | 32.1          | 32.3           | 32.5       | 32.3       | 32.5           | 31.8          | 32.9 | 33.9   | 33.7  | 33.8    | 34.5   | 34.9  | 34.9    | 33.8        | 33.6  | 33.0   | 33.9     | 33.6    |
| F36        | T12       | 34.8          | 34.9           | 33.8       | 34.2       | 34.9           | 35.0          | 33.2          | 33.4           | 33.3       | 33.4       | 33.8           | 33.1          | 32.8 | 33.0   | 32.2  | 33.3    | 34.1   | 34.2  | 34.8    | 33.3        | 33.2  | 31.1   | 32.8     | 33.1    |
| F38        | Hot water | 31.9          | 30.1           | 30.6       | 30.2       | 31.4           | 29.8          | 32.1          | 31.4           | 29.9       | 29.9       | 30.2           | 32.0          | 30.8 | 29.9   | 31.2  | 32.0    | 30.6   | 31.4  | 30.5    | 32.3        | 30.4  | 30.4   | 31.1     | 30.4    |
| F38        | T01a      | 35.3          | 34.6           | 35.0       | 35.6       | 34.9           | 35.5          | 33.5          | 33.3           | 33.1       | 33.3       | 33.4           | 33.3          | 30.3 | 32.1   | 30.2  | 31.5    | 32.1   | 32.6  | 33.6    | 31.5        | 30.7  | 30.0   | 31.7     | 31.0    |
| F38        | T01b      | 34.9          | 34.0           | 34.8       | 34.9       | 33.8           | 35.1          | 32.2          | 32.4           | 32.1       | 31.9       | 32.0           | 31.7          | 31.1 | 33.5   | 31.0  | 32.8    | 33.4   | 33.8  | 34.3    | 32.8        | 31.1  | 30.9   | 33.1     | 31.7    |
| F38        | T02       | 34.4          | 34.0           | 33.4       | 33.9       | 33.8           | 34.6          | 32.4          | 32.2           | 32.1       | 32.0       | 32.0           | 31.7          | 30.7 | 32.6   | 31.1  | 31.9    | 33.0   | 32.2  | 34.1    | 32.3        | 30.7  | 30.7   | 32.2     | 31.5    |
| F38        | T03       | 34.8          | 33.7           | 35.0       | 34.7       | 34.3           | 35.2          | 32.5          | 32.9           | 32.5       | 32.6       | 32.9           | 32.9          | 31.8 | 32.1   | 31.5  | 32.2    | 33.0   | 33.0  | 34.4    | 32.5        | 31.5  | 31.0   | 32.3     | 31.7    |
| F38        | T04a      | 34.8          | 34.5           | 33.6       | 33.8       | 34.5           | 34.8          | 32.5          | 32.6           | 32.6       | 32.3       | 32.3           | 32.3          | 30.8 | 32.5   | 30.6  | 32.0    | 32.4   | 31.5  | 33.8    | 32.0        | 30.4  | 29.7   | 32.4     | 30.7    |
| F38        | T04b      | 34.8          | 33.8           | 34.1       | 34.3       | 34.1           | 34.7          | 32.5          | 33.0           | 32.6       | 32.3       | 32.5           | 32.3          | 31.9 | 33.1   | 31.4  | 32.1    | 33.6   | 33.6  | 34.0    | 32.8        | 31.3  | 30.4   | 33.5     | 31.6    |
| F38        | T05       | 33.3          | 34.0           | 33.5       | 33.9       | 34.1           | 33.5          | 32.7          | 32.8           | 32.9       | 32.8       | 32.7           | 32.7          | 32.8 | 34.5   | 33.2  | 34.4    | 34.1   | 34.4  | 34.9    | 34.8        | 33.0  | 32.9   | 33.8     | 33.6    |
| F38        | T06       | 35.0          | 33.6           | 34.6       | 34.2       | 33.7           | 34.8          | 32.3          | 32.1           | 32.1       | 31.9       | 32.3           | 31.9          | 32.3 | 34.0   | 32.5  | 34.2    | 34.3   | 34.4  | 34.0    | 33.6        | 32.3  | 32.1   | 33.5     | 33.0    |
| F38        | T07       | 35.7          | 35.0           | 35.8       | 35.8       | 35.1           | 36.0          | 34.4          | 33.4           | 33.8       | 33.7       | 34.2           | 33.6          | 30.9 | 33.3   | 31.1  | 33.1    | 33.3   | 32.8  | 34.3    | 33.5        | 31.4  | 30.7   | 33.0     | 32.3    |
| F          |           |               |                |            |            |                |               |               |                |            |            |                |               |      |        |       |         |        |       |         |             |       |        |          |         |

Infrared imageries of human body activated by tea match the hypothesis of meridian system

(Supplementary Table 2 Continued)

| Individual | Tea       | VR Hypothenar | VR Palm center | VR Thenar | VL Thenar | VL Palm center | VL Hypothenar | DR Hypothenar | DR Palm center | DR Thenar | DL Thenar | DL Palm center | DL Hypothenar | Lung | Spleen | Colon | Stomach | Thymus | Liver | Thyroid | Gallbladder | Heart | Kidney | Duodenum | Bladder |
|------------|-----------|---------------|----------------|-----------|-----------|----------------|---------------|---------------|----------------|-----------|-----------|----------------|---------------|------|--------|-------|---------|--------|-------|---------|-------------|-------|--------|----------|---------|
| F42        | Hot water | 31.1          | 32.2           | 33.1      | 31.0      | 31.1           | 33.4          | 33.0          | 33.0           | 31.1      | 33.6      | 32.4           | 32.4          | 31.7 | 33.0   | 33.5  | 32.7    | 32.0   | 31.7  | 31.5    | 33.3        | 32.1  | 32.1   | 33.0     | 32.4    |
| F42        | T01a      | 34.4          | 34.6           | 34.4      | 34.3      | 34.4           | 34.2          | 34.0          | 34.1           | 34.0      | 33.8      | 33.8           | 33.7          | 32.1 | 32.9   | 32.8  | 32.9    | 33.7   | 33.4  | 33.5    | 33.2        | 33.4  | 31.6   | 31.1     | 32.6    |
| F42        | T01b      | 35.3          | 35.3           | 35.5      | 35.7      | 35.2           | 35.4          | 34.3          | 34.6           | 34.4      | 34.5      | 34.8           | 34.5          | 32.1 | 33.6   | 32.0  | 32.8    | 34.3   | 33.6  | 34.5    | 33.2        | 32.2  | 31.8   | 31.8     | 33.1    |
| F42        | T02       | 34.9          | 34.9           | 35.1      | 35.1      | 34.9           | 34.8          | 34.3          | 34.4           | 34.3      | 34.1      | 34.2           | 34.2          | 32.5 | 33.7   | 33.3  | 33.0    | 33.9   | 34.1  | 33.6    | 33.7        | 33.4  | 32.8   | 30.9     | 33.6    |
| F42        | T03       | 34.6          | 34.7           | 34.9      | 34.9      | 35.0           | 34.9          | 34.3          | 34.4           | 34.4      | 34.3      | 34.3           | 34.2          | 32.5 | 33.6   | 33.5  | 33.7    | 33.4   | 33.0  | 34.2    | 33.2        | 33.5  | 31.9   | 33.2     | 33.6    |
| F42        | T04a      | 35.3          | 35.3           | 35.6      | 35.6      | 35.1           | 35.4          | 33.9          | 34.4           | 34.4      | 34.4      | 34.4           | 34.6          | 32.1 | 32.7   | 32.3  | 32.4    | 33.5   | 33.0  | 33.7    | 33.0        | 32.6  | 31.4   | 33.1     | 33.2    |
| F42        | T04b      | 35.6          | 35.3           | 35.7      | 35.6      | 35.2           | 35.4          | 34.4          | 34.8           | 34.8      | 34.8      | 34.8           | 34.8          | 33.0 | 33.8   | 33.1  | 33.8    | 34.2   | 33.8  | 34.0    | 34.1        | 33.3  | 32.7   | 33.4     | 33.6    |
| F42        | T05       | 35.1          | 34.9           | 35.2      | 35.1      | 35.1           | 34.9          | 34.1          | 34.2           | 34.3      | 34.2      | 34.1           | 34.1          | 31.7 | 33.4   | 32.8  | 32.6    | 34.0   | 33.9  | 33.8    | 33.6        | 32.7  | 31.2   | 31.7     | 32.0    |
| F42        | T06       | 35.2          | 34.9           | 35.4      | 35.5      | 35.2           | 35.2          | 33.9          | 34.1           | 34.4      | 34.2      | 34.4           | 34.1          | 31.8 | 33.7   | 32.8  | 32.6    | 34.0   | 33.8  | 34.4    | 33.8        | 32.3  | 32.1   | 31.8     | 33.5    |
| F42        | T07       | 35.5          | 35.4           | 35.7      | 35.9      | 35.6           | 35.6          | 34.4          | 34.7           | 34.5      | 34.7      | 34.7           | 34.6          | 32.4 | 33.0   | 32.6  | 32.1    | 32.0   | 33.1  | 34.4    | 33.3        | 32.4  | 31.4   | 31.9     | 32.3    |
| F42        | T08       | 35.4          | 35.5           | 35.9      | 36.0      | 35.5           | 35.6          | 34.6          | 34.9           | 34.8      | 34.7      | 34.7           | 34.4          | 33.2 | 34.1   | 33.1  | 33.1    | 34.2   | 34.1  | 34.6    | 33.7        | 33.1  | 32.7   | 32.9     | 33.0    |
| F42        | T09       | 33.8          | 33.9           | 34.2      | 34.1      | 34.0           | 33.8          | 33.4          | 33.6           | 33.5      | 34.3      | 33.4           | 33.4          | 32.5 | 33.8   | 33.5  | 33.3    | 34.1   | 34.0  | 34.1    | 34.1        | 33.9  | 32.0   | 32.4     | 33.6    |
| F42        | T10       | 34.1          | 34.6           | 34.1      | 34.4      | 34.4           | 34.1          | 33.9          | 34.2           | 34.3      | 33.9      | 33.9           | 33.9          | 33.0 | 34.0   | 33.2  | 33.5    | 34.1   | 33.9  | 33.9    | 33.8        | 33.5  | 32.3   | 33.1     | 33.5    |
| F42        | T11       | 34.8          | 34.7           | 34.8      | 35.1      | 34.8           | 34.7          | 34.0          | 34.3           | 34.4      | 34.1      | 34.2           | 34.2          | 32.4 | 33.6   | 32.9  | 32.8    | 33.9   | 33.7  | 33.9    | 33.3        | 33.2  | 32.4   | 32.0     | 33.2    |
| F42        | T12       | 34.6          | 34.7           | 34.9      | 34.9      | 34.7           | 34.6          | 33.9          | 34.4           | 34.3      | 34.2      | 34.1           | 34.1          | 32.8 | 33.3   | 33.3  | 33.5    | 33.4   | 33.9  | 34.2    | 33.9        | 33.6  | 32.4   | 32.3     | 33.3    |
| F44        | Hot water | 31.2          | 31.1           | 31.3      | 31.0      | 30.9           | 32.5          | 32.3          | 31.3           | 31.2      | 31.6      | 31.1           | 32.0          | 32.3 | 30.9   | 31.8  | 31.6    | 30.6   | 32.2  | 31.5    | 31.6        | 32.2  | 31.0   | 32.0     | 32.3    |
| F44        | T01a      | 32.5          | 32.8           | 32.9      | 32.8      | 32.4           | 32.1          | 31.1          | 31.2           | 31.8      | 31.7      | 30.9           | 30.8          | 32.1 | 32.8   | 33.0  | 34.5    | 33.6   | 34.6  | 33.5    | 32.4        | 33.1  | 32.0   | 32.3     | 32.8    |
| F44        | T01b      | 34.0          | 33.8           | 34.0      | 33.9      | 34.5           | 34.0          | 32.2          | 32.2           | 32.4      | 32.1      | 32.1           | 31.9          | 31.6 | 32.4   | 32.1  | 33.8    | 33.6   | 32.6  | 32.6    | 32.2        | 32.4  | 31.5   | 31.1     | 31.7    |
| F44        | T02       | 33.5          | 33.4           | 33.4      | 33.0      | 31.9           | 32.8          | 31.8          | 31.2           | 31.6      | 31.4      | 30.8           | 30.7          | 31.9 | 33.6   | 32.6  | 34.4    | 33.6   | 32.6  | 33.9    | 33.0        | 32.4  | 31.9   | 31.8     | 32.8    |
| F44        | T03       | 33.6          | 33.4           | 33.8      | 33.4      | 32.7           | 33.5          | 32.0          | 32.8           | 32.3      | 32.5      | 31.9           | 32.1          | 33.2 | 33.5   | 33.0  | 34.9    | 34.0   | 35.2  | 34.4    | 34.0        | 32.8  | 32.3   | 31.9     | 33.0    |
| F44        | T04a      | 33.8          | 33.9           | 33.8      | 33.5      | 33.6           | 33.3          | 32.1          | 31.9           | 32.2      | 31.8      | 32.0           | 31.8          | 31.1 | 33.7   | 31.9  | 34.7    | 32.7   | 35.1  | 32.4    | 32.5        | 32.3  | 31.9   | 31.1     | 31.8    |
| F44        | T04b      | 33.1          | 33.4           | 33.7      | 33.4      | 33.3           | 33.2          | 31.9          | 32.3           | 32.3      | 32.0      | 31.8           | 32.0          | 33.1 | 33.9   | 33.0  | 35.1    | 33.6   | 35.6  | 33.6    | 33.4        | 33.5  | 32.2   | 33.3     | 32.6    |
| F44        | T05       | 33.2          | 34.0           | 33.7      | 33.8      | 34.1           | 33.7          | 32.8          | 33.1           | 33.1      | 32.7      | 32.6           | 32.9          | 33.8 | 35.1   | 33.7  | 35.1    | 34.5   | 34.8  | 34.1    | 35.4        | 33.5  | 33.0   | 33.8     | 33.4    |
| F44        | T06       | 33.6          | 34.0           | 34.2      | 34.2      | 33.7           | 33.6          | 32.1          | 32.3           | 32.3      | 32.1      | 31.6           | 31.4          | 32.3 | 35.2   | 33.1  | 35.1    | 33.9   | 34.2  | 33.8    | 35.2        | 33.1  | 31.6   | 33.0     | 33.2    |
| F44        | T07       | 33.4          | 34.4           | 34.1      | 33.8      | 33.9           | 33.6          | 32.7          | 33.0           | 33.7      | 32.8      | 32.6           | 32.7          | 33.0 | 34.5   | 32.9  | 34.8    | 34.2   | 35.2  | 33.4    | 33.9        | 33.5  | 31.8   | 33.5     | 33.0    |
| F44        | T08       | 33.6          | 34.4           | 34.3      | 34.2      | 34.2           | 33.7          | 32.4          | 32.5           | 32.6      | 32.3      | 32.1           | 32.2          | 32.5 | 33.9   | 32.8  | 35.1    | 34.0   | 34.4  | 34.2    | 33.3        | 33.4  | 32.5   | 31.8     | 32.3    |
| F44        | T09       | 33.8          | 34.0           | 34.2      | 33.6      | 33.4           | 33.0          | 31.9          | 32.8           | 32.0      | 31.8      | 31.4           | 31.3          | 31.9 | 31.8   | 31.7  | 33.8    | 34.1   | 34.1  | 32.9    | 31.9        | 32.3  | 30.5   | 31.0     | 32.2    |
| F44        | T10       | 33.5          | 33.6           | 34.0      | 33.9      | 33.2           | 33.4          | 32.0          | 32.7           | 32.6      | 31.9      | 31.8           | 31.7          | 31.9 | 33.2   | 32.7  | 34.1    | 33.6   | 32.8  | 33.0    | 33.8        | 33.0  | 31.4   | 33.7     | 32.9    |
| F44        | T11       | 33.0          | 33.3           | 33.2      | 33.5      | 33.1           | 33.6          | 32.3          | 33.1           | 32.7      | 32.9      | 32.3           | 32.2          | 33.0 | 33.9   | 33.1  | 33.8    | 33.1   | 34.1  | 34.0    | 33.3        | 32.9  | 32.2   | 31.4     | 33.3    |
| F44        | T12       | 34.8          | 34.6           | 34.8      | 34.9      | 34.3           | 34.8          | 33.2          | 33.7           | 33.3      | 33.7      | 32.9           | 33.4          | 32.9 | 33.8   | 32.8  | 34.7    | 33.4   | 34.2  | 33.8    | 33.1        | 33.0  | 32.2   | 31.8     | 32.5    |
| F46        | T01a      | 33.8          | 33.3           | 33.6      | 33.4      | 32.6           | 33.6          | 31.6          | 32.3           | 31.6      | 32.1      | 31.9           | 31.5          | 29.0 | 31.8   | 29.9  | 33.2    | 30.4   | 31.1  | 31.9    | 31.0        | 30.3  | 28.0   | 30.7     | 31.5    |
| F46        | T01b      | 34.2          | 34.5           | 34.6      | 34.2      | 34.3           | 34.0          | 32.4          | 32.6           | 32.7      | 32.7      | 32.9           | 32.3          | 29.0 | 32.3   | 31.1  | 33.2    | 30.9   | 32.8  | 32.1    | 33.3        | 30.6  | 28.4   | 30.5     | 32.1    |
| F46        | T02       | 33.3          | 33.2           | 33.3      | 33.3      | 33.0           | 33.2          | 31.4          | 31.2           | 31.1      | 31.2      | 32.1           | 31.1          | 28.8 | 31.2   | 30.4  | 32.5    | 30.0   | 30.5  | 30.9    | 30.9        | 29.7  | 28.1   | 29.4     | 31.6    |
| F46        | T09       | 33.7          | 33.8           | 34.1      | 33.3      | 33.5           | 33.5          | 31.6          | 32.6           | 32.0      | 31.7      | 32.2           | 31.3          | 29.1 | 30.7   | 30.3  | 31.0    | 30.3   | 30.5  | 31.4    | 31.7        | 30.2  | 27.8   | 28.9     | 31.3    |
| F46        | T10       | 34.2          | 33.3           | 33.9      | 33.4      | 33.1           | 33.6          | 31.8          | 32.3           | 31.8      | 31.8      | 32.8           | 31.2          | 29.4 | 30.9   | 30.2  | 32.7    | 30.6   | 30.6  | 31.0    | 32.5        | 30.0  | 28.5   | 29.6     | 32.2    |
| F48        | Hot water | 31.8          | 31.1           | 32.4      | 31.3      | 32.8           | 33.0          | 31.4          | 32.0           | 32.0      | 32.6      | 32.1           | 32.8          | 32.1 | 31.6   | 31.6  | 33.0    | 32.8   | 33.1  | 31.2    | 32.2        | 32.5  | 31.6   | 31.4     | 32.8    |
| F48        | T01b      | 35.5          | 35.7           | 35.7      | 35.8      | 35.7           | 35.8          | 34.0          | 34.5           | 33.7      | 33.5      | 33.8           | 33.3          | 32.4 | 33.3   | 32.8  | 33.6    | 33.3   | 32.4  | 33.7    | 33.4        | 32.6  | 32.3   | 32.2     | 32.8    |
| F48        | T02       | 34.4          | 34.4           | 34.7      | 34.4      | 34.5           | 34.4          | 32.5          | 33.4           | 33.0      | 32.3      | 32.8           | 32.5          | 32.1 | 33.3   | 32.4  | 33.5    | 33.2   | 33.4  | 33.8    | 33.6        | 32.4  | 31.8   | 32.6     | 32.8    |
| F48        | T03       | 33.8          | 34.3           | 33.9      | 34.0      | 34.4           | 33.8          | 33.2          | 33.6           | 33.6      | 33.6      | 33.5           | 33.1          | 33.8 | 33.6   | 33.4  | 34.4    | 33.7   | 33.2  | 33.4    | 34.4        | 34.0  | 33.0   | 32.9     | 33.5    |
| F48        | T04a      | 34.8          | 34.8           | 34.7      | 34.6      | 34.8           | 34.4          | 33.0          | 33.2           | 32.9      | 32.8      | 33.1           | 32.3          | 31.4 | 33.2   | 32.5  | 32.9    | 32.3   | 32.4  | 33.0    | 33.3        | 31.9  | 31.6   | 32.0     | 32.6    |
| F48        | T04b      | 35.2          | 35.0           | 34.2      | 35.3      | 35.1           | 35.3          | 33.3          | 33.3           | 33.1      | 33.0      | 33.4           | 33.2          | 32.0 | 32.9   | 32.5  | 32.1    | 32.1   | 32.2  | 32.1    | 33.4        | 32.5  | 31.9   | 32.0     | 32.7    |
| F48        | T05       | 33.8          | 34.1           | 33.8      | 34.1      | 34.5           | 33.8          | 31.4          | 32.0           | 32.2      | 32.3      | 32.1           | 31.7          | 32.8 | 33.7   | 32.9  | 33.9    | 34.0   | 33.0  | 33.3    | 33.8        | 33.3  | 32.3   | 32.9     | 33.4    |
| F48        | T06       | 35.3          | 35.4           | 35.3      | 35.6      | 35.4           | 35.6          | 33.4          | 34.0           | 33.6      | 33.5      | 33.8           | 33.0          | 32.0 | 33.0   | 33.4  | 33.4    | 33.5   | 32.3  | 33.6    | 33.1        | 32.7  | 32.2   | 32.3     | 33.1    |
| F48        | T07       | 35.2          | 35.2           | 35.0      | 35.2      | 35.1           | 35.0          | 33.3          | 33.8           | 33.2      | 32.8      | 33.4           | 33.0          | 32.0 | 33.5   | 33.1  | 33.7    | 33.8   | 33.4  | 33.7    | 33.6        | 32.7  | 32.1   | 32.8     | 32.8    |
| F48        | T08       | 35.5          | 35.1           | 35.3      | 35.0      | 35.0           | 35.2          | 33.4          | 33.5           | 32.6      | 33.8      | 33.0           | 32.8          | 32.8 | 33.3   | 33.6  | 33.8    | 33.6   | 33.4  | 33.6    | 33.5        | 33.2  | 32.9   | 32.5     | 33.3    |
| F48        | T09       | 33.8          | 34.0           | 33.8      | 33.8      | 34.0           | 33.8          | 33.3          | 33.8           | 33.8      | 33.8      | 33.9           | 33.4          | 33.0 | 33.8   | 33.4  | 33.0    | 32.6   | 33.8  | 32.0    | 33.6        | 33.5  | 33.1   | 32.3     | 33.6    |
| F48        | T10       | 31.4          | 32.8           | 31.9      | 32.3      | 33.0           | 32.1          | 30.4          | 31.1           | 31.5      | 31.4      | 30.9           | 30.5          | 33.5 | 34.1   | 34.0  | 34.8    | 34.4   | 33.3  | 33.9    | 34.5        | 33.8  | 33.5   | 32.7     | 33.8    |
| F48        | T11       | 34.4          | 34.5           | 34.5      | 34.3      | 34.3           | 34.3          | 33.3          | 33.4           | 33.4      | 32.8      | 33.1           | 32.7          | 32.6 | 33.9   | 33.5  | 34.3    | 33.6   | 32.9  | 34.5    | 34.0        | 33.3  | 33.3   | 32.6     | 33.5    |
| F48        | T12       | 34.2          | 34.6           | 34.5      | 34.1      | 34.3           | 34.2          | 33.0          | 33.7           | 33.2      | 32.6      | 32.6           | 32.3          | 31.5 | 33.4   | 32.5  | 33.2    | 33.1   | 32.4  | 33.9    | 33.4        | 32.4  | 31.5   | 32.4     | 33.0    |
| F50        | T03       | 33.3          | 33.8           | 33.4      | 33.4      | 33.8           | 33.3          | 32.1          | 32.2           | 33.0      | 32.6      | 32.5           | 32.3          | 32.0 | 32.5   | 32.4  | 32.1    | 32.5   | 31.1  | 34.1    | 32.1        | 31.2  | 30.3   | 30.4     | 32.5    |
| F50        | T04a      | 32.6          | 33.1           | 32.5      | 32.7      | 33.1           | 32.3          | 31.8          | 32.3           | 32.2      | 32.3      | 32.5           | 32.2          | 31.9 | 32.5   | 32.6  | 32.7    | 32.6   | 31.1  | 34.5    | 31.3        | 32.3  | 30.3   | 31.3     | 33.1    |
| F50        |           |               |                |           |           |                |               |               |                |           |           |                |               |      |        |       |         |        |       |         |             |       |        |          |         |

**Supplementary Table 3 Statistics of the maximum temperatures derived from body surface areas after drinking different tea**

| Male                              |                                                    |            |         |         |         |         |         |        |             |            |
|-----------------------------------|----------------------------------------------------|------------|---------|---------|---------|---------|---------|--------|-------------|------------|
| Tea                               | Hypothetic Meridian Channel                        | Statistics | Finger1 | Finger2 | Finger3 | Finger4 | Finger5 | Thenar | Palm center | Hypothenar |
| White tea-<br>Silver Needles      | Grand Lunar<br>Lung Channel                        | mean       | 34.33   | 34.03   | 34.06   | 34.01   | 33.53   | 33.83  | 33.90       | 33.78      |
|                                   |                                                    | median     | 34.70   | 34.38   | 34.55   | 34.40   | 33.95   | 33.93  | 34.20       | 34.05      |
|                                   |                                                    | sd         | 1.32    | 1.45    | 1.44    | 1.37    | 1.51    | 1.42   | 1.42        | 1.53       |
| White tea-<br>Old Eyebrows        | Grand Lunar<br>Spleen Channel                      | mean       | 34.43   | 34.29   | 34.51   | 34.35   | 33.77   | 33.92  | 33.98       | 33.89      |
|                                   |                                                    | median     | 34.43   | 34.18   | 34.55   | 34.38   | 33.90   | 33.93  | 34.00       | 34.03      |
|                                   |                                                    | sd         | 1.07    | 1.07    | 1.08    | 1.11    | 1.15    | 1.35   | 1.39        | 1.30       |
| Black tea-<br>Tangerine<br>Pu'erh | Middle Lunar<br>Thymus Channel                     | mean       | 34.70   | 34.77   | 35.28   | 34.76   | 34.22   | 34.21  | 34.44       | 34.28      |
|                                   |                                                    | median     | 34.60   | 34.75   | 35.33   | 34.83   | 34.30   | 34.00  | 34.55       | 34.28      |
|                                   |                                                    | sd         | 0.76    | 0.82    | 0.87    | 0.78    | 1.00    | 1.22   | 1.27        | 1.17       |
| Black tea-<br>Golden Fungi        | Middle Lunar<br>Liver Channel                      | mean       | 35.01   | 35.16   | 35.33   | 35.14   | 34.75   | 34.62  | 34.78       | 34.71      |
|                                   |                                                    | median     | 35.33   | 35.23   | 35.40   | 35.25   | 34.93   | 34.65  | 34.88       | 34.83      |
|                                   |                                                    | sd         | 0.94    | 1.03    | 1.06    | 0.95    | 1.02    | 1.33   | 1.29        | 1.23       |
| Yellow tea-<br>Golden Buns        | Little Lunar<br>Heart Channel                      | mean       | 33.62   | 33.58   | 33.79   | 33.75   | 33.49   | 33.45  | 33.60       | 33.45      |
|                                   |                                                    | median     | 33.80   | 33.80   | 33.95   | 33.95   | 33.63   | 33.38  | 33.65       | 33.38      |
|                                   |                                                    | sd         | 1.45    | 1.50    | 1.48    | 1.35    | 1.61    | 1.42   | 1.49        | 1.43       |
| Yellow tea-<br>Golden Bricks      | Little Lunar<br>Kidney Channel                     | mean       | 33.89   | 33.90   | 34.09   | 34.09   | 33.74   | 33.80  | 33.92       | 33.79      |
|                                   |                                                    | median     | 33.83   | 33.98   | 34.20   | 34.18   | 33.85   | 33.78  | 34.10       | 33.98      |
|                                   |                                                    | sd         | 1.00    | 0.92    | 0.99    | 0.96    | 1.09    | 1.13   | 1.11        | 1.18       |
| Green tea-<br>Monkey<br>Champion  | Grand Solar<br>Duodenum Channel                    | mean       | 34.61   | 34.52   | 34.65   | 34.55   | 34.32   | 34.52  | 34.57       | 34.63      |
|                                   |                                                    | median     | 34.58   | 34.53   | 34.70   | 34.53   | 34.35   | 34.63  | 34.73       | 34.68      |
|                                   |                                                    | sd         | 0.78    | 0.87    | 0.83    | 0.77    | 1.09    | 1.13   | 1.12        | 1.06       |
| Green tea-<br>Dragon Well         | Grand Solar<br>BladderChannel                      | mean       | 34.32   | 34.34   | 34.52   | 34.40   | 34.22   | 34.33  | 34.44       | 34.34      |
|                                   |                                                    | median     | 34.40   | 34.35   | 34.63   | 34.43   | 34.33   | 34.35  | 34.58       | 34.35      |
|                                   |                                                    | sd         | 0.87    | 0.94    | 0.93    | 0.77    | 1.08    | 0.94   | 0.95        | 1.01       |
| Blue tea-<br>Titkuanyim           | Middle Solar<br>Colon Channel                      | mean       | 34.50   | 34.79   | 34.62   | 34.41   | 33.87   | 34.24  | 34.33       | 34.33      |
|                                   |                                                    | median     | 34.50   | 34.83   | 34.65   | 34.43   | 34.10   | 34.30  | 34.58       | 34.40      |
|                                   |                                                    | sd         | 1.04    | 1.01    | 1.12    | 0.97    | 1.10    | 1.33   | 1.32        | 1.23       |
| Blue tea-<br>Red Garment          | Middle Solar<br>Stomach Channel-<br>Cardia Branch  | mean       | 35.37   | 35.34   | 35.44   | 35.38   | 34.89   | 34.84  | 34.89       | 34.90      |
|                                   |                                                    | median     | 35.60   | 35.48   | 35.70   | 35.60   | 35.00   | 34.88  | 35.15       | 35.13      |
|                                   |                                                    | sd         | 1.52    | 1.32    | 1.61    | 1.58    | 1.76    | 1.59   | 1.62        | 1.78       |
| Blue tea-<br>Phoenix<br>Unique    | Middle Solar<br>Stomach Channel-<br>Pylorus Branch | mean       | 35.44   | 35.49   | 35.54   | 35.47   | 34.99   | 35.12  | 35.24       | 35.24      |
|                                   |                                                    | median     | 35.73   | 35.60   | 35.75   | 35.63   | 35.10   | 35.35  | 35.58       | 35.60      |
|                                   |                                                    | sd         | 1.24    | 1.16    | 1.23    | 1.17    | 1.35    | 1.47   | 1.48        | 1.47       |
| Red tea-<br>Lapsang<br>Souchong   | Little Solar<br>Three-Gland Channel                | mean       | 34.36   | 34.38   | 34.52   | 34.42   | 33.68   | 34.01  | 34.16       | 34.11      |
|                                   |                                                    | median     | 34.45   | 34.43   | 34.55   | 34.38   | 33.75   | 34.15  | 34.40       | 34.20      |
|                                   |                                                    | sd         | 0.91    | 1.30    | 1.15    | 1.10    | 1.13    | 1.42   | 1.42        | 1.25       |
| Red tea-<br>Red Grape             | Little Solar<br>Gall Channel                       | mean       | 34.77   | 34.62   | 34.79   | 34.86   | 34.27   | 34.53  | 34.60       | 34.56      |
|                                   |                                                    | median     | 34.93   | 34.78   | 35.08   | 35.05   | 34.40   | 34.68  | 34.90       | 34.78      |
|                                   |                                                    | sd         | 0.86    | 0.95    | 0.96    | 1.02    | 0.99    | 1.30   | 1.31        | 1.20       |

**Infrared imageries of human body activated by tea match the hypothesis of meridian system**

**(Supplementary Table 3 Continued)**

| Male                       |                                             |            |       |        |        |       |       |        |          |         |       |         |         |             |
|----------------------------|---------------------------------------------|------------|-------|--------|--------|-------|-------|--------|----------|---------|-------|---------|---------|-------------|
| Tea                        | Hypothetic Meridian Channel                 | Statistics | Lung  | Spleen | Thymus | Liver | Heart | Kidney | Duodenum | Bladder | Colon | Stomach | Thyroid | Gallbladder |
| White tea-Silver Needles   | Grand Lunar Lung Channel                    | mean       | 33.23 | 33.49  | 34.15  | 33.32 | 33.33 | 32.86  | 33.37    | 33.59   | 33.14 | 33.40   | 34.78   | 33.35       |
|                            |                                             | median     | 32.95 | 33.80  | 34.50  | 33.50 | 33.00 | 32.60  | 33.90    | 33.60   | 33.00 | 33.55   | 34.90   | 33.40       |
|                            |                                             | sd         | 1.26  | 1.47   | 1.01   | 1.55  | 1.16  | 1.39   | 1.60     | 1.16    | 1.05  | 1.46    | 1.00    | 1.58        |
| White tea-Old Eyebrows     | Grand Lunar Spleen Channel                  | mean       | 32.79 | 33.36  | 34.13  | 33.11 | 33.04 | 32.69  | 32.96    | 33.45   | 33.01 | 33.15   | 34.99   | 33.11       |
|                            |                                             | median     | 32.80 | 33.50  | 34.25  | 33.55 | 33.20 | 32.70  | 33.05    | 33.40   | 33.00 | 33.55   | 35.10   | 33.15       |
|                            |                                             | sd         | 1.49  | 1.22   | 0.91   | 1.43  | 1.34  | 1.46   | 1.46     | 1.04    | 1.14  | 1.37    | 0.83    | 1.39        |
| Black tea-Tangerine Pu'erh | Middle Lunar Thymus Channel                 | mean       | 32.95 | 33.24  | 35.18  | 33.24 | 33.32 | 32.51  | 33.02    | 33.28   | 32.92 | 33.18   | 34.88   | 33.11       |
|                            |                                             | median     | 32.70 | 33.15  | 35.15  | 33.25 | 33.25 | 32.25  | 33.00    | 33.15   | 32.95 | 33.15   | 34.85   | 33.15       |
|                            |                                             | sd         | 1.31  | 1.17   | 0.89   | 1.17  | 1.22  | 1.19   | 1.28     | 0.84    | 0.98  | 1.04    | 0.89    | 1.17        |
| Black tea-Golden Fungi     | Middle Lunar Liver Channel                  | mean       | 32.74 | 33.11  | 34.02  | 33.49 | 33.17 | 32.60  | 32.79    | 33.26   | 32.89 | 33.10   | 34.87   | 32.80       |
|                            |                                             | median     | 32.75 | 32.95  | 34.00  | 33.40 | 33.15 | 32.85  | 32.55    | 33.35   | 33.00 | 32.95   | 34.90   | 32.35       |
|                            |                                             | sd         | 0.90  | 1.13   | 0.84   | 1.20  | 0.77  | 1.11   | 1.19     | 1.12    | 1.00  | 1.02    | 0.88    | 1.26        |
| Yellow tea-Golden Buns     | Little Lunar Heart Channel                  | mean       | 32.51 | 32.81  | 33.93  | 32.82 | 33.23 | 32.10  | 32.58    | 32.86   | 32.61 | 32.86   | 34.84   | 32.79       |
|                            |                                             | median     | 32.65 | 33.30  | 34.20  | 33.25 | 33.10 | 32.25  | 33.25    | 33.05   | 32.35 | 33.35   | 34.85   | 33.35       |
|                            |                                             | sd         | 1.34  | 1.26   | 0.95   | 1.37  | 1.34  | 1.43   | 1.43     | 1.19    | 1.22  | 1.30    | 0.86    | 1.24        |
| Yellow tea-Golden Bricks   | Little Lunar Kidney Channel                 | mean       | 32.96 | 33.41  | 34.30  | 33.36 | 33.30 | 33.43  | 33.19    | 33.47   | 33.23 | 33.42   | 35.11   | 33.43       |
|                            |                                             | median     | 33.00 | 33.10  | 34.40  | 33.65 | 33.15 | 33.50  | 32.90    | 33.50   | 32.90 | 33.55   | 35.30   | 33.45       |
|                            |                                             | sd         | 1.46  | 1.30   | 1.13   | 1.64  | 1.43  | 1.19   | 1.59     | 1.08    | 1.18  | 1.48    | 0.95    | 1.43        |
| Green tea-Monkey Champion  | Grand Solar Duodenum Channel                | mean       | 33.61 | 34.06  | 34.60  | 33.94 | 33.76 | 33.36  | 34.24    | 33.78   | 33.54 | 33.96   | 35.11   | 34.02       |
|                            |                                             | median     | 33.90 | 33.80  | 34.85  | 34.05 | 33.85 | 33.35  | 33.85    | 33.95   | 33.40 | 34.20   | 35.25   | 33.95       |
|                            |                                             | sd         | 1.35  | 1.08   | 0.97   | 1.36  | 1.22  | 1.39   | 1.50     | 1.41    | 1.05  | 1.37    | 0.81    | 1.30        |
| Green tea-Dragon Well      | Grand Solar Bladder Channel                 | mean       | 33.39 | 33.75  | 34.48  | 33.64 | 33.54 | 33.04  | 33.64    | 33.66   | 33.38 | 33.61   | 35.20   | 33.74       |
|                            |                                             | median     | 33.75 | 34.20  | 34.90  | 34.10 | 33.75 | 33.40  | 34.35    | 33.95   | 33.55 | 34.35   | 35.35   | 34.25       |
|                            |                                             | sd         | 1.27  | 1.10   | 0.99   | 1.41  | 1.24  | 1.46   | 1.29     | 1.06    | 1.11  | 1.38    | 0.80    | 1.17        |
| Blue tea-Titkuanyim        | Middle Solar Colon Channel                  | mean       | 33.39 | 33.65  | 34.38  | 33.55 | 33.47 | 33.11  | 33.42    | 33.58   | 33.75 | 33.65   | 35.03   | 33.52       |
|                            |                                             | median     | 33.00 | 33.70  | 34.50  | 33.20 | 33.30 | 32.90  | 33.20    | 33.60   | 33.60 | 33.30   | 35.30   | 33.20       |
|                            |                                             | sd         | 1.19  | 1.09   | 0.93   | 1.21  | 1.07  | 1.21   | 1.25     | 1.19    | 1.08  | 1.21    | 0.85    | 1.06        |
| Blue tea-Red Garment       | Middle Solar Stomach Channel-Cardia Branch  | mean       | 33.87 | 34.06  | 34.86  | 33.89 | 34.17 | 33.50  | 33.81    | 34.16   | 33.75 | 33.96   | 35.02   | 33.94       |
|                            |                                             | median     | 34.00 | 34.45  | 35.10  | 34.25 | 34.35 | 33.75  | 33.95    | 34.25   | 33.90 | 34.35   | 35.50   | 34.35       |
|                            |                                             | sd         | 1.03  | 1.00   | 0.89   | 1.08  | 1.04  | 1.23   | 1.16     | 0.93    | 0.85  | 1.16    | 1.11    | 1.02        |
| Blue tea-Phoenix Unique    | Middle Solar Stomach Channel-Pylorus Branch | mean       | 33.79 | 34.26  | 34.91  | 34.08 | 33.94 | 33.41  | 33.94    | 33.89   | 33.66 | 34.24   | 35.14   | 34.01       |
|                            |                                             | median     | 34.15 | 34.35  | 34.90  | 34.30 | 34.15 | 33.50  | 33.85    | 34.20   | 33.80 | 34.25   | 35.55   | 34.00       |
|                            |                                             | sd         | 1.14  | 1.27   | 0.98   | 1.21  | 1.23  | 1.38   | 1.45     | 1.34    | 0.91  | 1.22    | 1.09    | 1.27        |
| Red tea-Lapsang Souchong   | Little Solar Three-Gland Channel            | mean       | 32.55 | 33.00  | 33.73  | 32.86 | 32.77 | 32.30  | 32.57    | 32.93   | 32.67 | 32.78   | 34.54   | 32.66       |
|                            |                                             | median     | 32.40 | 33.25  | 34.00  | 33.00 | 32.55 | 32.35  | 32.55    | 33.15   | 32.75 | 32.75   | 34.75   | 32.60       |
|                            |                                             | sd         | 1.02  | 1.01   | 0.86   | 1.09  | 1.17  | 1.25   | 1.03     | 0.81    | 0.94  | 0.94    | 1.01    | 0.97        |
| Red tea-Red Grape          | Little Solar Gall Channel                   | mean       | 33.35 | 33.68  | 34.33  | 33.69 | 33.57 | 33.19  | 33.47    | 33.75   | 33.33 | 33.60   | 34.72   | 33.80       |
|                            |                                             | median     | 33.40 | 34.10  | 34.60  | 33.90 | 33.70 | 33.40  | 33.90    | 33.90   | 33.60 | 34.10   | 34.90   | 33.80       |
|                            |                                             | sd         | 1.10  | 1.06   | 0.96   | 1.12  | 1.11  | 1.28   | 1.33     | 1.02    | 1.11  | 1.03    | 1.00    | 1.22        |

**(Supplementary Table 3 Continued)**

| Female                            |                                                    |            |         |         |         |         |         |        |             |            |
|-----------------------------------|----------------------------------------------------|------------|---------|---------|---------|---------|---------|--------|-------------|------------|
| Tea                               | Hypothetic Meridian Channel                        | Statistics | Finger1 | Finger2 | Finger3 | Finger4 | Finger5 | Thenar | Palm center | Hypothenar |
| White tea-<br>Silver Needles      | Grand Lunar<br>Lung Channel                        | mean       | 33.86   | 33.99   | 34.17   | 33.93   | 33.28   | 33.21  | 33.47       | 33.39      |
|                                   |                                                    | median     | 34.03   | 34.13   | 34.18   | 34.01   | 33.45   | 33.35  | 33.46       | 33.51      |
|                                   |                                                    | sd         | 0.77    | 1.01    | 0.93    | 1.11    | 1.14    | 0.95   | 0.99        | 0.92       |
| White tea-<br>Old Eyebrows        | Grand Lunar<br>Spleen Channel                      | mean       | 33.65   | 33.91   | 34.03   | 33.68   | 32.93   | 32.98  | 33.25       | 33.22      |
|                                   |                                                    | median     | 33.71   | 34.00   | 34.16   | 33.69   | 33.16   | 33.11  | 33.25       | 33.14      |
|                                   |                                                    | sd         | 0.90    | 0.91    | 0.87    | 1.06    | 1.25    | 1.10   | 0.98        | 0.92       |
| Black tea-<br>Tangerine<br>Pu'erh | Middle Lunar<br>Thymus Channel                     | mean       | 33.72   | 33.88   | 34.02   | 33.57   | 32.89   | 33.05  | 33.56       | 33.41      |
|                                   |                                                    | median     | 33.69   | 33.76   | 34.31   | 33.95   | 32.98   | 33.13  | 33.60       | 33.48      |
|                                   |                                                    | sd         | 0.89    | 0.81    | 0.95    | 1.07    | 1.09    | 0.87   | 0.70        | 0.68       |
| Black tea-<br>Golden Fungi        | Middle Lunar<br>Liver Channel                      | mean       | 33.91   | 34.02   | 33.99   | 33.78   | 33.28   | 33.34  | 33.66       | 33.62      |
|                                   |                                                    | median     | 33.95   | 34.00   | 33.95   | 33.80   | 33.28   | 33.45  | 33.65       | 33.45      |
|                                   |                                                    | sd         | 0.84    | 0.98    | 0.99    | 1.02    | 1.05    | 0.90   | 0.84        | 0.85       |
| Yellow tea-<br>Golden Buns        | Little Lunar<br>Heart Channel                      | mean       | 33.35   | 33.62   | 33.68   | 33.27   | 32.38   | 32.57  | 33.18       | 33.00      |
|                                   |                                                    | median     | 33.73   | 34.01   | 34.03   | 33.65   | 32.88   | 33.00  | 33.46       | 33.25      |
|                                   |                                                    | sd         | 1.14    | 1.32    | 1.30    | 1.45    | 1.70    | 1.22   | 1.09        | 0.95       |
| Yellow tea-<br>Golden Bricks      | Little Lunar<br>Kidney Channel                     | mean       | 33.57   | 33.77   | 33.72   | 33.23   | 32.54   | 32.64  | 33.06       | 33.03      |
|                                   |                                                    | median     | 33.63   | 33.98   | 34.01   | 33.46   | 32.91   | 32.85  | 33.19       | 33.05      |
|                                   |                                                    | sd         | 1.09    | 1.22    | 1.28    | 1.47    | 1.66    | 1.26   | 1.00        | 1.05       |
| Green tea-<br>Monkey<br>Champion  | Grand Solar<br>Duodenum Channel                    | mean       | 34.02   | 34.25   | 34.51   | 34.24   | 33.58   | 33.43  | 33.65       | 33.62      |
|                                   |                                                    | median     | 34.03   | 34.33   | 34.50   | 34.25   | 33.65   | 33.43  | 33.58       | 33.58      |
|                                   |                                                    | sd         | 0.64    | 0.60    | 0.65    | 0.74    | 0.73    | 0.80   | 0.76        | 0.71       |
| Green tea-<br>Dragon Well         | Grand Solar<br>Bladder Channel                     | mean       | 34.51   | 34.82   | 35.10   | 34.77   | 34.00   | 33.69  | 33.89       | 33.85      |
|                                   |                                                    | median     | 34.60   | 34.83   | 35.03   | 34.83   | 34.20   | 33.85  | 33.99       | 33.94      |
|                                   |                                                    | sd         | 0.55    | 0.73    | 0.60    | 0.81    | 0.93    | 0.83   | 0.83        | 0.74       |
| Blue tea-<br>Titkuanyim           | Middle Solar<br>Colon Channel                      | mean       | 33.98   | 34.05   | 34.06   | 33.94   | 33.62   | 33.61  | 33.69       | 33.71      |
|                                   |                                                    | median     | 34.00   | 34.18   | 34.15   | 34.05   | 33.78   | 33.73  | 33.68       | 33.73      |
|                                   |                                                    | sd         | 0.58    | 0.76    | 0.73    | 0.76    | 0.72    | 0.65   | 0.69        | 0.61       |
| Blue tea-<br>Red Garment          | Middle Solar<br>Stomach Channel-<br>Cardia Branch  | mean       | 33.89   | 33.99   | 34.05   | 33.92   | 33.48   | 33.49  | 33.81       | 33.59      |
|                                   |                                                    | median     | 33.93   | 34.00   | 34.10   | 34.08   | 33.53   | 33.55  | 33.83       | 33.63      |
|                                   |                                                    | sd         | 0.82    | 0.83    | 0.87    | 0.93    | 0.94    | 0.77   | 0.67        | 0.64       |
| Blue tea-<br>Phoenix<br>Unique    | Middle Solar<br>Stomach Channel-<br>Pylorus Branch | mean       | 34.45   | 34.53   | 34.67   | 34.52   | 34.12   | 33.93  | 34.16       | 34.11      |
|                                   |                                                    | median     | 34.44   | 34.65   | 34.73   | 34.54   | 34.31   | 33.91  | 34.21       | 34.09      |
|                                   |                                                    | sd         | 0.60    | 0.60    | 0.64    | 0.67    | 0.63    | 0.60   | 0.68        | 0.65       |
| Red tea-<br>Lapsang<br>Souchong   | Little Solar<br>Three-Gland Channel                | mean       | 34.31   | 34.47   | 34.63   | 34.47   | 34.00   | 33.79  | 34.03       | 33.91      |
|                                   |                                                    | median     | 34.56   | 34.63   | 34.69   | 34.53   | 34.23   | 33.84  | 33.95       | 33.85      |
|                                   |                                                    | sd         | 0.79    | 0.77    | 0.75    | 0.94    | 1.04    | 0.83   | 0.85        | 0.71       |
| Red tea-<br>Red Grape             | Little Solar<br>Gall Channel                       | mean       | 34.38   | 34.51   | 34.60   | 34.53   | 34.01   | 33.88  | 34.08       | 33.95      |
|                                   |                                                    | median     | 34.59   | 34.55   | 34.68   | 34.50   | 34.06   | 33.91  | 33.93       | 33.90      |
|                                   |                                                    | sd         | 0.71    | 0.69    | 0.74    | 0.71    | 0.82    | 0.71   | 0.75        | 0.67       |

**Infrared imageries of human body activated by tea match the hypothesis of meridian system**

**(Supplementary Table 3 Continued)**

| Female                     |                                             |            |       |        |        |       |       |        |          |         |       |         |         |             |
|----------------------------|---------------------------------------------|------------|-------|--------|--------|-------|-------|--------|----------|---------|-------|---------|---------|-------------|
| Tea                        | Hypothetic Meridian Channel                 | Statistics | Lung  | Spleen | Thymus | Liver | Heart | Kidney | Duodenum | Bladder | Colon | Stomach | Thyroid | Gallbladder |
| White tea-Silver Needles   | Grand Lunar Lung Channel                    | mean       | 33.38 | 32.92  | 33.05  | 32.85 | 32.78 | 32.87  | 31.94    | 32.72   | 31.95 | 31.21   | 31.97   | 32.80       |
|                            |                                             | median     | 33.30 | 33.20  | 33.15  | 32.95 | 33.15 | 33.00  | 31.70    | 33.05   | 32.05 | 31.45   | 32.15   | 32.85       |
|                            |                                             | sd         | 0.79  | 0.96   | 1.02   | 1.11  | 1.51  | 1.10   | 1.50     | 1.09    | 1.03  | 1.29    | 1.39    | 0.83        |
| White tea-Old Eyebrows     | Grand Lunar Spleen Channel                  | mean       | 33.62 | 33.03  | 33.09  | 32.70 | 32.53 | 32.80  | 31.89    | 32.34   | 31.78 | 31.23   | 31.82   | 32.75       |
|                            |                                             | median     | 33.80 | 33.25  | 33.05  | 32.55 | 32.65 | 32.85  | 32.20    | 32.40   | 31.90 | 31.35   | 31.75   | 32.75       |
|                            |                                             | sd         | 0.89  | 1.07   | 0.86   | 1.11  | 1.21  | 0.97   | 1.24     | 1.06    | 0.93  | 1.15    | 1.17    | 0.88        |
| Black tea-Tangerine Pu'erh | Middle Lunar Thymus Channel                 | mean       | 34.25 | 33.72  | 33.74  | 33.55 | 33.25 | 33.66  | 32.66    | 33.23   | 32.55 | 31.78   | 32.53   | 33.39       |
|                            |                                             | median     | 34.10 | 34.00  | 33.85  | 33.70 | 33.15 | 33.80  | 32.85    | 33.25   | 32.75 | 32.00   | 32.75   | 33.40       |
|                            |                                             | sd         | 0.58  | 0.92   | 1.18   | 1.30  | 1.34  | 1.33   | 1.27     | 0.97    | 1.05  | 1.07    | 1.22    | 0.62        |
| Black tea-Golden Fungi     | Middle Lunar Liver Channel                  | mean       | 34.08 | 33.67  | 33.70  | 33.79 | 33.52 | 33.60  | 32.80    | 33.14   | 32.37 | 31.95   | 32.51   | 33.53       |
|                            |                                             | median     | 34.10 | 33.90  | 34.20  | 34.00 | 33.90 | 33.80  | 33.30    | 33.10   | 32.30 | 32.10   | 32.60   | 33.50       |
|                            |                                             | sd         | 0.90  | 0.96   | 1.18   | 1.11  | 1.37  | 1.39   | 1.21     | 0.93    | 0.87  | 1.10    | 1.31    | 0.57        |
| Yellow tea-Golden Buns     | Little Lunar Heart Channel                  | mean       | 33.68 | 33.00  | 33.08  | 32.85 | 32.75 | 32.77  | 31.80    | 32.67   | 31.98 | 31.08   | 31.98   | 33.02       |
|                            |                                             | median     | 33.95 | 33.05  | 33.05  | 33.05 | 32.80 | 32.75  | 32.20    | 32.70   | 31.95 | 31.30   | 31.75   | 32.95       |
|                            |                                             | sd         | 1.04  | 1.12   | 0.97   | 1.30  | 1.27  | 1.23   | 1.41     | 1.07    | 1.01  | 1.15    | 1.06    | 0.86        |
| Yellow tea-Golden Bricks   | Little Lunar Kidney Channel                 | mean       | 33.52 | 33.14  | 33.19  | 32.83 | 32.61 | 32.73  | 31.97    | 32.55   | 31.79 | 31.30   | 32.05   | 32.89       |
|                            |                                             | median     | 33.55 | 33.20  | 33.30  | 33.00 | 32.60 | 32.75  | 32.25    | 32.70   | 31.75 | 31.40   | 32.50   | 32.75       |
|                            |                                             | sd         | 0.86  | 1.03   | 0.89   | 0.94  | 1.20  | 1.17   | 1.36     | 1.07    | 1.00  | 1.17    | 1.28    | 0.74        |
| Green tea-Monkey Champion  | Grand Solar Duodenum Channel                | mean       | 33.97 | 33.31  | 33.43  | 33.38 | 32.94 | 32.86  | 32.25    | 32.72   | 32.11 | 31.67   | 32.48   | 33.01       |
|                            |                                             | median     | 33.90 | 33.40  | 33.80  | 33.50 | 33.40 | 33.30  | 32.50    | 32.90   | 32.10 | 31.50   | 32.70   | 33.30       |
|                            |                                             | sd         | 0.71  | 0.96   | 1.03   | 0.56  | 1.71  | 1.15   | 1.14     | 0.80    | 0.79  | 0.87    | 0.88    | 0.74        |
| Green tea-Dragon Well      | Grand Solar Bladder Channel                 | mean       | 33.90 | 33.21  | 33.32  | 32.87 | 32.79 | 32.93  | 32.11    | 32.37   | 32.01 | 31.26   | 32.21   | 32.77       |
|                            |                                             | median     | 33.95 | 33.45  | 33.30  | 33.05 | 32.80 | 33.05  | 32.20    | 32.40   | 31.80 | 31.20   | 32.35   | 32.90       |
|                            |                                             | sd         | 0.62  | 0.90   | 0.79   | 0.90  | 1.14  | 1.05   | 0.75     | 0.83    | 0.75  | 0.71    | 0.80    | 0.60        |
| Blue tea-Titkuanyim        | Middle Solar Colon Channel                  | mean       | 33.59 | 33.27  | 33.54  | 33.13 | 32.98 | 33.20  | 32.39    | 32.94   | 32.53 | 31.78   | 32.63   | 33.03       |
|                            |                                             | median     | 33.40 | 33.30  | 33.70  | 33.50 | 33.00 | 33.20  | 32.50    | 33.00   | 32.70 | 31.70   | 32.70   | 33.30       |
|                            |                                             | sd         | 0.71  | 0.68   | 0.86   | 1.10  | 1.31  | 0.87   | 0.88     | 0.92    | 0.90  | 0.91    | 0.94    | 0.76        |
| Blue tea-Red Garment       | Middle Solar Stomach Channel-Cadia Branch   | mean       | 33.96 | 33.76  | 33.77  | 33.56 | 33.69 | 33.73  | 32.98    | 33.17   | 32.75 | 32.02   | 32.87   | 33.13       |
|                            |                                             | median     | 34.00 | 33.95  | 33.75  | 33.60 | 33.65 | 33.80  | 33.10    | 33.20   | 32.80 | 31.90   | 32.95   | 33.00       |
|                            |                                             | sd         | 0.74  | 0.78   | 0.92   | 0.58  | 0.99  | 0.66   | 1.12     | 0.90    | 0.75  | 0.78    | 0.87    | 0.74        |
| Blue tea-Phoenix Unique    | Middle Solar Stomach Channel-Pylorus Branch | mean       | 33.98 | 33.51  | 33.59  | 33.57 | 33.60 | 33.57  | 32.76    | 33.00   | 32.25 | 31.75   | 32.55   | 33.27       |
|                            |                                             | median     | 33.80 | 33.70  | 33.70  | 33.60 | 33.60 | 33.60  | 33.05    | 32.90   | 32.40 | 31.85   | 32.75   | 33.25       |
|                            |                                             | sd         | 0.76  | 0.95   | 1.02   | 0.83  | 1.03  | 0.82   | 1.00     | 0.86    | 0.85  | 0.81    | 0.92    | 0.73        |
| Red tea-Lapsang Souchong   | Little Solar Three-Gland Channel            | mean       | 34.21 | 33.87  | 33.98  | 33.86 | 33.74 | 33.95  | 32.81    | 33.38   | 32.85 | 32.06   | 33.17   | 33.47       |
|                            |                                             | median     | 34.20 | 33.95  | 33.90  | 33.90 | 34.00 | 33.80  | 33.05    | 33.30   | 32.85 | 32.15   | 33.10   | 33.40       |
|                            |                                             | sd         | 0.66  | 0.58   | 0.84   | 0.85  | 1.12  | 0.84   | 1.19     | 0.74    | 0.73  | 0.86    | 0.76    | 0.66        |
| Red tea-Red Grape          | Little Solar Gall Channel                   | mean       | 33.96 | 33.76  | 33.77  | 33.56 | 33.69 | 33.73  | 32.98    | 33.17   | 32.75 | 32.02   | 32.87   | 33.13       |
|                            |                                             | median     | 34.00 | 33.95  | 33.75  | 33.60 | 33.65 | 33.80  | 33.10    | 33.20   | 32.80 | 31.90   | 32.95   | 33.00       |
|                            |                                             | sd         | 0.74  | 0.78   | 0.92   | 0.58  | 0.99  | 0.66   | 1.12     | 0.90    | 0.75  | 0.78    | 0.87    | 0.74        |



**Supplementary Table 4 Significances of the differences between the temperatures within each body area after drinking different tea**

| Male       | Finger1 |        |        |        |        |        |        |        |        |        |        |        |
|------------|---------|--------|--------|--------|--------|--------|--------|--------|--------|--------|--------|--------|
| T02-White  | 0.0316  |        |        |        |        |        |        |        |        |        |        |        |
| T03-Blue   | 0.0024  | 0.2660 |        |        |        |        |        |        |        |        |        |        |
| T04a-Blue  | 0.0083  | 0.4469 | 0.7798 |        |        |        |        |        |        |        |        |        |
| T04b-Blue  | 0.0037  | 0.2344 | 0.8327 | 0.6528 |        |        |        |        |        |        |        |        |
| T05-Black  | 0.0001  | 0.0297 | 0.2952 | 0.2112 | 0.4863 |        |        |        |        |        |        |        |
| T06-Black  | 0.0012  | 0.0440 | 0.1955 | 0.1487 | 0.2854 | 0.5252 |        |        |        |        |        |        |
| T07-Red    | 0.0019  | 0.3034 | 0.8647 | 0.8882 | 0.7109 | 0.1889 | 0.1494 |        |        |        |        |        |
| T08-Red    | 0.0018  | 0.3559 | 0.7095 | 0.9822 | 0.5812 | 0.1040 | 0.1112 | 0.8342 |        |        |        |        |
| T09-Yellow | 0.0018  | 0.0972 | 0.4133 | 0.3160 | 0.5572 | 0.9614 | 0.6145 | 0.3281 | 0.2500 |        |        |        |
| T10-Yellow | 0.0016  | 0.0648 | 0.2741 | 0.2097 | 0.3840 | 0.6835 | 0.8495 | 0.2142 | 0.1622 | 0.7587 |        |        |
| T11-Green  | 0.1265  | 0.6644 | 0.1625 | 0.2794 | 0.1461 | 0.0221 | 0.0285 | 0.1830 | 0.2117 | 0.0618 | 0.0417 |        |
| T12-Green  | 0.0002  | 0.0236 | 0.1585 | 0.1168 | 0.2614 | 0.5239 | 0.9293 | 0.1089 | 0.0710 | 0.6383 | 0.9041 | 0.0158 |
|            | T01     | T02    | T03    | T04a   | T04b   | T05    | T06    | T07    | T08    | T09    | T10    | T11    |

Note: After drinking T01, the lung white tea, the temperature rise on Finger 1 was significant, comparing to those after drinking other tea.

| Male       | Finger2 |        |        |        |        |        |        |        |        |        |        |        |
|------------|---------|--------|--------|--------|--------|--------|--------|--------|--------|--------|--------|--------|
| T01-White  |         | 0.6095 | 0.0020 |        |        |        |        |        |        |        |        |        |
| T02-White  |         |        | 0.0026 |        |        |        |        |        |        |        |        |        |
| T04a-Blue  | 0.4848  | 0.8096 | 0.0053 |        |        |        |        |        |        |        |        |        |
| T04b-Blue  | 0.1408  | 0.0936 | 0.0479 | 0.0960 |        |        |        |        |        |        |        |        |
| T05-Black  | 0.3860  | 0.7974 | 0.0005 | 0.9740 | 0.0325 |        |        |        |        |        |        |        |
| T06-Black  | 0.4379  | 0.2670 | 0.0416 | 0.2263 | 0.6522 | 0.1472 |        |        |        |        |        |        |
| T07-Red    | 0.6765  | 0.4165 | 0.0162 | 0.3409 | 0.3981 | 0.2531 | 0.7397 |        |        |        |        |        |
| T08-Red    | 0.4551  | 0.9064 | 0.0004 | 0.8704 | 0.0340 | 0.8676 | 0.1701 | 0.2949 |        |        |        |        |
| T09-Yellow | 0.1799  | 0.4436 | 0.0004 | 0.6530 | 0.0173 | 0.5645 | 0.0701 | 0.1210 | 0.4573 |        |        |        |
| T10-Yellow | 0.2560  | 0.6308 | 0.0002 | 0.8732 | 0.0164 | 0.8080 | 0.0938 | 0.1684 | 0.6705 | 0.7122 |        |        |
| T11-Green  | 0.3427  | 0.7023 | 0.0009 | 0.9242 | 0.0375 | 0.8776 | 0.1368 | 0.2287 | 0.7539 | 0.6861 | 0.9455 |        |
| T12-Green  | 0.3923  | 0.8007 | 0.0006 | 0.9725 | 0.0344 | 0.9979 | 0.1507 | 0.2578 | 0.8710 | 0.5654 | 0.8076 | 0.8765 |
|            | T01     | T02    | T03    | T04a   | T04b   | T05    | T06    | T07    | T08    | T09    | T10    | T11    |

Note: After drinking T03, the colon blue tea, the temperature rise on Finger 2 was significant, comparing to those after drinking other tea.

| Male       | Finger3 |        |        |        |        |        |        |        |        |        |        |        |
|------------|---------|--------|--------|--------|--------|--------|--------|--------|--------|--------|--------|--------|
| T01-White  |         | 0.0087 | 0.1495 | 0.3127 | 0.0386 | 0.0000 |        |        |        |        |        |        |
| T02-White  |         |        | 0.1552 | 0.3361 | 0.5532 | 0.0000 |        |        |        |        |        |        |
| T03-Blue   |         |        |        | 0.9895 | 0.4293 | 0.0000 |        |        |        |        |        |        |
| T04a-Blue  |         |        |        |        | 0.5813 | 0.0007 |        |        |        |        |        |        |
| T04b-Blue  |         |        |        |        |        | 0.0000 |        |        |        |        |        |        |
| T06-Black  | 0.0024  | 0.4051 | 0.0415 | 0.1405 | 0.1864 | 0.0026 |        |        |        |        |        |        |
| T07-Red    | 0.0198  | 0.6682 | 0.2986 | 0.4854 | 0.8450 | 0.0000 | 0.2246 |        |        |        |        |        |
| T08-Red    | 0.0464  | 0.2364 | 0.6293 | 0.7580 | 0.6523 | 0.0000 | 0.0592 | 0.4670 |        |        |        |        |
| T09-Yellow | 0.1689  | 0.5381 | 0.7169 | 0.7641 | 0.8449 | 0.0011 | 0.2426 | 0.7358 | 0.9329 |        |        |        |
| T10-Yellow | 0.0330  | 0.9516 | 0.2861 | 0.4151 | 0.6784 | 0.0010 | 0.4609 | 0.7855 | 0.4175 | 0.6173 |        |        |
| T11-Green  | 0.0272  | 0.9630 | 0.2609 | 0.3984 | 0.6549 | 0.0008 | 0.4545 | 0.7636 | 0.3858 | 0.6006 | 0.9887 |        |
| T12-Green  | 0.0017  | 0.1729 | 0.0211 | 0.0658 | 0.0812 | 0.0661 | 0.5081 | 0.0964 | 0.0304 | 0.1148 | 0.2155 | 0.2091 |
|            | T01     | T02    | T03    | T04a   | T04b   | T05    | T06    | T07    | T08    | T09    | T10    | T11    |

Note: After drinking T05, the thymus black tea, the temperature rise on Finger 3 was significant, comparing to those after drinking other tea.

| Male       | Finger4 |        |        |        |        |        |        |        |        |        |        |        |
|------------|---------|--------|--------|--------|--------|--------|--------|--------|--------|--------|--------|--------|
| T01-White  |         | 0.1600 | 0.7799 | 0.1176 | 0.0922 | 0.7143 | 0.4107 | 0.0113 | 0.0000 |        |        |        |
| T02-White  |         |        | 0.1388 | 0.5690 | 0.6288 | 0.0754 | 0.7253 | 0.2780 | 0.0017 |        |        |        |
| T03-Blue   |         |        |        | 0.0983 | 0.0806 | 0.9843 | 0.3306 | 0.0153 | 0.0001 |        |        |        |
| T04a-Blue  |         |        |        |        | 0.8808 | 0.0713 | 0.4266 | 0.8348 | 0.0829 |        |        |        |
| T04b-Blue  |         |        |        |        |        | 0.0472 | 0.4580 | 0.6557 | 0.0241 |        |        |        |
| T05-Black  |         |        |        |        |        |        | 0.2645 | 0.0034 | 0.0000 |        |        |        |
| T06-Black  |         |        |        |        |        |        |        | 0.2062 | 0.0037 |        |        |        |
| T07-Red    |         |        |        |        |        |        |        |        | 0.0223 |        |        |        |
| T08-Red    |         |        |        |        |        |        |        |        |        |        |        |        |
| T09-Yellow | 0.1247  | 0.5724 | 0.1040 | 0.9926 | 0.8756 | 0.0768 | 0.4316 | 0.8485 | 0.0930 |        |        |        |
| T10-Yellow | 0.0039  | 0.0858 | 0.0048 | 0.4122 | 0.2634 | 0.0015 | 0.0696 | 0.4001 | 0.2736 | 0.4298 |        |        |
| T11-Green  | 0.5927  | 0.1450 | 0.7633 | 0.0944 | 0.0875 | 0.7530 | 0.2797 | 0.0298 | 0.0008 | 0.0983 | 0.0102 |        |
| T12-Green  | 0.6523  | 0.5254 | 0.5290 | 0.3138 | 0.3270 | 0.4728 | 0.7818 | 0.1382 | 0.0028 | 0.3194 | 0.0470 | 0.4239 |
|            | T01     | T02    | T03    | T04a   | T04b   | T05    | T06    | T07    | T08    | T09    | T10    | T11    |

Note: After drinking T08 and T07, the red tea of thyroid and gallbladder, the temperature rise on Finger 4 was significant, comparing to those after drinking other tea.

| Male       | Finger5 |        |        |        |        |        |        |        |        |        |        |        |
|------------|---------|--------|--------|--------|--------|--------|--------|--------|--------|--------|--------|--------|
| T01-White  | 0.9699  | 0.1369 | 0.0705 | 0.2055 | 0.0881 | 0.0566 | 0.2278 | 0.1793 | 0.0007 | 0.0049 | 0.0937 | 0.0075 |
| T02-White  |         | 0.2060 | 0.0765 | 0.2695 | 0.1101 | 0.0669 | 0.2896 | 0.2290 | 0.0008 | 0.0072 | 0.0984 | 0.0084 |
| T03-Blue   |         |        | 0.0111 | 0.9521 | 0.0027 | 0.0043 | 0.9433 | 0.8497 | 0.0001 | 0.0002 | 0.0199 | 0.0012 |
| T04a-Blue  |         |        |        | 0.0141 | 0.4799 | 0.7916 | 0.0152 | 0.0124 | 0.1061 | 0.6981 | 0.9604 | 0.3221 |
| T04b-Blue  |         |        |        |        | 0.0063 | 0.0067 | 0.9900 | 0.8267 | 0.0001 | 0.0004 | 0.0237 | 0.0015 |
| T05-Black  |         |        |        |        |        | 0.6057 | 0.0080 | 0.0072 | 0.0117 | 0.1573 | 0.4886 | 0.0765 |
| T06-Black  |         |        |        |        |        |        | 0.0077 | 0.0064 | 0.0419 | 0.4355 | 0.7673 | 0.1837 |
| T07-Red    |         |        |        |        |        |        |        | 0.8234 | 0.0001 | 0.0004 | 0.0251 | 0.0016 |
| T08-Red    |         |        |        |        |        |        |        |        | 0.0001 | 0.0004 | 0.0206 | 0.0013 |
| T09-Yellow |         |        |        |        |        |        |        |        |        | 0.1359 | 0.1431 | 0.5678 |
| T10-Yellow |         |        |        |        |        |        |        |        |        |        | 0.7668 | 0.4410 |
| T11-Green  |         |        |        |        |        |        |        |        |        |        |        | 0.3770 |
|            | T02     | T03    | T04a   | T04b   | T05    | T06    | T07    | T08    | T09    | T10    | T11    | T12    |

Note: After drinking T09-12, the yellow tea and green tea, the temperature rise on Finger 5 was significant, comparing to those after drinking other tea.

Notes: The darkness of the bottom color stands for the strength of the significance. The data in the boxes are those expected to be significant. T01, Silver White Needles; T02, Old Eyebrows; T03, Titkuanyim; T04a, Red Garment; T04b, Phoenix Unique; T05, Lapsang Souchong; T06, Red Grape; T07, Tangerine Pu'eh; T08, Golden Fungi; T09, Golden Buns; T10, Golden Bricks; T11, Monkey Champion; T12, Dragon Well.

**Infrared imageries of human body activated by tea match the hypothesis of meridian system**

**(Supplementary Table 4 Continued)**

| Male Thenar                                                                                                                                   |        |        |        |        |        |        |        |        |        |        |        |        |
|-----------------------------------------------------------------------------------------------------------------------------------------------|--------|--------|--------|--------|--------|--------|--------|--------|--------|--------|--------|--------|
| T02-White                                                                                                                                     | 0.2204 |        |        |        |        |        |        |        |        |        |        |        |
| T03-Blue                                                                                                                                      | 0.2664 | 0.9491 |        |        |        |        |        |        |        |        |        |        |
| T04a-Blue                                                                                                                                     | 0.6179 | 0.5094 | 0.5654 |        |        |        |        |        |        |        |        |        |
| T04b-Blue                                                                                                                                     | 0.3274 | 0.8817 | 0.9325 | 0.6384 |        |        |        |        |        |        |        |        |
| T05-Black                                                                                                                                     | 0.0605 | 0.4931 | 0.4763 | 0.2007 | 0.4453 |        |        |        |        |        |        |        |
| T06-Black                                                                                                                                     | 0.0814 | 0.5185 | 0.4991 | 0.2285 | 0.4667 | 0.9761 |        |        |        |        |        |        |
| T07-Red                                                                                                                                       | 0.1294 | 0.6933 | 0.6625 | 0.3271 | 0.6172 | 0.8177 | 0.8124 |        |        |        |        |        |
| T08-Red                                                                                                                                       | 0.9533 | 0.3368 | 0.3782 | 0.7118 | 0.4341 | 0.1370 | 0.1544 | 0.2186 |        |        |        |        |
| T09-Yellow                                                                                                                                    | 0.4379 | 0.6362 | 0.6991 | 0.8203 | 0.7794 | 0.2462 | 0.2820 | 0.4064 | 0.5570 |        |        |        |
| T10-Yellow                                                                                                                                    | 0.5877 | 0.4457 | 0.5107 | 0.9885 | 0.5932 | 0.1389 | 0.1751 | 0.2684 | 0.6991 | 0.7854 |        |        |
| T11-Green                                                                                                                                     | 0.2206 | 0.8606 | 0.8227 | 0.4601 | 0.7698 | 0.6922 | 0.6951 | 0.8616 | 0.3121 | 0.5639 | 0.4115 |        |
| T12-Green                                                                                                                                     | 0.5795 | 0.5857 | 0.6386 | 0.9393 | 0.7083 | 0.2579 | 0.2825 | 0.3903 | 0.6711 | 0.8930 | 0.9226 | 0.5235 |
|                                                                                                                                               | T01    | T02    | T03    | T04a   | T04b   | T05    | T06    | T07    | T08    | T09    | T10    | T11    |
| Male Palm center                                                                                                                              |        |        |        |        |        |        |        |        |        |        |        |        |
| T01-White                                                                                                                                     |        | 0.3364 | 0.4076 | 0.3797 | 0.5262 | 0.0947 |        |        |        |        |        |        |
| T02-White                                                                                                                                     |        |        | 0.0925 | 0.0705 | 0.1263 | 0.6281 |        |        |        |        |        |        |
| T03-Blue                                                                                                                                      |        |        |        | 0.9756 | 0.8337 | 0.0184 |        |        |        |        |        |        |
| T04a-Blue                                                                                                                                     |        |        |        |        | 0.8430 | 0.0074 |        |        |        |        |        |        |
| T04b-Blue                                                                                                                                     |        |        |        |        |        | 0.0243 |        |        |        |        |        |        |
| T06-Black                                                                                                                                     | 0.6882 | 0.5379 | 0.2218 | 0.1863 | 0.2987 | 0.1893 |        |        |        |        |        |        |
| T07-Red                                                                                                                                       | 0.7875 | 0.2222 | 0.5607 | 0.5433 | 0.7059 | 0.0483 | 0.4947 |        |        |        |        |        |
| T08-Red                                                                                                                                       | 0.5180 | 0.1205 | 0.8347 | 0.8440 | 0.9968 | 0.0210 | 0.2897 | 0.6991 |        |        |        |        |
| T09-Yellow                                                                                                                                    | 0.4208 | 0.8134 | 0.1120 | 0.0827 | 0.1543 | 0.3914 | 0.6736 | 0.2763 | 0.1468 |        |        |        |
| T10-Yellow                                                                                                                                    | 0.6058 | 0.6229 | 0.1878 | 0.1544 | 0.2541 | 0.2521 | 0.8995 | 0.4274 | 0.2456 | 0.7741 |        |        |
| T11-Green                                                                                                                                     | 0.5045 | 0.1113 | 0.8345 | 0.8436 | 0.9932 | 0.0170 | 0.2746 | 0.6882 | 0.9963 | 0.1348 | 0.2315 |        |
| T12-Green                                                                                                                                     | 0.7537 | 0.4510 | 0.2383 | 0.1974 | 0.3231 | 0.1153 | 0.9076 | 0.5411 | 0.3130 | 0.5714 | 0.8041 | 0.2961 |
|                                                                                                                                               | T01    | T02    | T03    | T04a   | T04b   | T05    | T06    | T07    | T08    | T09    | T10    | T11    |
| Note: After drinking T05, the thymus black, the temperature rise in palm center was significant, comparing to those after drinking other tea. |        |        |        |        |        |        |        |        |        |        |        |        |
| Male Hypothear                                                                                                                                |        |        |        |        |        |        |        |        |        |        |        |        |
| T01-White                                                                                                                                     | 0.9872 | 0.0768 | 0.2333 | 0.1250 | 0.9447 | 0.2676 | 0.1014 | 0.4085 | 0.8816 | 0.9335 | 0.0580 | 0.8198 |
| T02-White                                                                                                                                     |        | 0.0569 | 0.2007 | 0.0954 | 0.9277 | 0.2267 | 0.0729 | 0.3513 | 0.8840 | 0.9404 | 0.0383 | 0.7924 |
| T03-Blue                                                                                                                                      |        |        | 0.6352 | 0.7634 | 0.0932 | 0.4859 | 0.7894 | 0.2390 | 0.0583 | 0.0727 | 0.9835 | 0.1180 |
| T04a-Blue                                                                                                                                     |        |        |        | 0.8368 | 0.2652 | 0.8617 | 0.7995 | 0.5684 | 0.1882 | 0.2169 | 0.6264 | 0.3209 |
| T04b-Blue                                                                                                                                     |        |        |        |        | 0.1494 | 0.6782 | 0.9630 | 0.3735 | 0.0956 | 0.1173 | 0.7607 | 0.1879 |
| T05-Black                                                                                                                                     |        |        |        |        |        | 0.3063 | 0.1239 | 0.4639 | 0.8297 | 0.8815 | 0.0732 | 0.8775 |
| T06-Black                                                                                                                                     |        |        |        |        |        |        | 0.6344 | 0.6746 | 0.2134 | 0.2483 | 0.4646 | 0.3735 |
| T07-Red                                                                                                                                       |        |        |        |        |        |        |        | 0.3253 | 0.0760 | 0.0959 | 0.7881 | 0.1578 |
| T08-Red                                                                                                                                       |        |        |        |        |        |        |        |        | 0.3256 | 0.3765 | 0.2020 | 0.5642 |
| T09-Yellow                                                                                                                                    |        |        |        |        |        |        |        |        |        | 0.9513 | 0.0425 | 0.7076 |
| T10-Yellow                                                                                                                                    |        |        |        |        |        |        |        |        |        |        | 0.0558 | 0.7615 |
| T11-Green                                                                                                                                     |        |        |        |        |        |        |        |        |        |        |        | 0.0945 |
|                                                                                                                                               | T02    | T03    | T04a   | T04b   | T05    | T06    | T07    | T08    | T09    | T10    | T11    | T12    |
| Male Lung                                                                                                                                     |        |        |        |        |        |        |        |        |        |        |        |        |
| T02-White                                                                                                                                     | 0.2569 |        |        |        |        |        |        |        |        |        |        |        |
| T03-Blue                                                                                                                                      | 0.5930 | 0.6124 |        |        |        |        |        |        |        |        |        |        |
| T04a-Blue                                                                                                                                     | 0.8114 | 0.4241 | 0.7835 |        |        |        |        |        |        |        |        |        |
| T04b-Blue                                                                                                                                     | 0.5825 | 0.6825 | 0.9579 | 0.7574 |        |        |        |        |        |        |        |        |
| T05-Black                                                                                                                                     | 0.5600 | 0.6377 | 0.9687 | 0.7516 | 0.9867 |        |        |        |        |        |        |        |
| T06-Black                                                                                                                                     | 0.3076 | 0.9877 | 0.6384 | 0.4621 | 0.6989 | 0.6625 |        |        |        |        |        |        |
| T07-Red                                                                                                                                       | 0.4648 | 0.6877 | 0.8892 | 0.6648 | 0.9424 | 0.9213 | 0.7119 |        |        |        |        |        |
| T08-Red                                                                                                                                       | 0.4683 | 0.7647 | 0.8528 | 0.6484 | 0.9039 | 0.8818 | 0.7768 | 0.9507 |        |        |        |        |
| T09-Yellow                                                                                                                                    | 0.4124 | 0.7898 | 0.8079 | 0.5983 | 0.8646 | 0.8375 | 0.8014 | 0.9063 | 0.9623 |        |        |        |
| T10-Yellow                                                                                                                                    | 0.0446 | 0.3740 | 0.1969 | 0.1150 | 0.2634 | 0.2035 | 0.4572 | 0.1988 | 0.2833 | 0.2702 |        |        |
| T11-Green                                                                                                                                     | 0.8068 | 0.4715 | 0.8121 | 0.9836 | 0.7847 | 0.7823 | 0.5016 | 0.7029 | 0.6828 | 0.6376 | 0.1529 |        |
| T12-Green                                                                                                                                     | 0.4320 | 0.7202 | 0.8537 | 0.6309 | 0.9100 | 0.8854 | 0.7415 | 0.9617 | 0.9847 | 0.9419 | 0.2100 | 0.6711 |
|                                                                                                                                               | T01    | T02    | T03    | T04a   | T04b   | T05    | T06    | T07    | T08    | T09    | T10    | T11    |
| Male Spleen                                                                                                                                   |        |        |        |        |        |        |        |        |        |        |        |        |
| T02-White                                                                                                                                     | 0.6617 |        |        |        |        |        |        |        |        |        |        |        |
| T03-Blue                                                                                                                                      | 0.8534 | 0.4532 |        |        |        |        |        |        |        |        |        |        |
| T04a-Blue                                                                                                                                     | 0.9958 | 0.7369 | 0.8929 |        |        |        |        |        |        |        |        |        |
| T04b-Blue                                                                                                                                     | 0.1019 | 0.1426 | 0.0436 | 0.1892 |        |        |        |        |        |        |        |        |
| T05-Black                                                                                                                                     | 0.4265 | 0.1952 | 0.4705 | 0.5194 | 0.0223 |        |        |        |        |        |        |        |
| T06-Black                                                                                                                                     | 0.5561 | 0.2871 | 0.6247 | 0.6343 | 0.0366 | 0.8428 |        |        |        |        |        |        |
| T07-Red                                                                                                                                       | 0.5770 | 0.8373 | 0.4121 | 0.6523 | 0.2682 | 0.1885 | 0.2668 |        |        |        |        |        |
| T08-Red                                                                                                                                       | 0.9087 | 0.5165 | 0.9372 | 0.9345 | 0.0544 | 0.4411 | 0.5877 | 0.4606 |        |        |        |        |
| T09-Yellow                                                                                                                                    | 0.1511 | 0.0409 | 0.1467 | 0.2513 | 0.0035 | 0.5592 | 0.4305 | 0.0494 | 0.1370 |        |        |        |
| T10-Yellow                                                                                                                                    | 0.2765 | 0.0846 | 0.2861 | 0.3961 | 0.0069 | 0.8445 | 0.6791 | 0.0969 | 0.2661 | 0.6569 |        |        |
| T11-Green                                                                                                                                     | 0.8957 | 0.6953 | 0.6958 | 0.9172 | 0.0739 | 0.3013 | 0.4255 | 0.5985 | 0.7668 | 0.0730 | 0.1499 |        |
| T12-Green                                                                                                                                     | 0.7557 | 0.4059 | 0.8701 | 0.8111 | 0.0450 | 0.5886 | 0.7462 | 0.3702 | 0.8177 | 0.2266 | 0.4082 | 0.6070 |
|                                                                                                                                               | T01    | T02    | T03    | T04a   | T04b   | T05    | T06    | T07    | T08    | T09    | T10    | T11    |

**Infrared imageries of human body activated by tea match the hypothesis of meridian system**

**(Supplementary Table 4 Continued)**

| Male Colon |        |        |        |        |        |        |        |        |        |        |        |        |
|------------|--------|--------|--------|--------|--------|--------|--------|--------|--------|--------|--------|--------|
|            | T01    | T02    | T03    | T04a   | T04b   | T05    | T06    | T07    | T08    | T09    | T10    | T11    |
| T01-White  |        | 0.6394 | 0.0109 |        |        |        |        |        |        |        |        |        |
| T02-White  |        |        | 0.0202 |        |        |        |        |        |        |        |        |        |
| T04a-Blue  | 0.9515 | 0.6378 | 0.0174 |        |        |        |        |        |        |        |        |        |
| T04b-Blue  | 0.5776 | 0.3168 | 0.0053 | 0.6550 |        |        |        |        |        |        |        |        |
| T05-Black  | 0.7996 | 0.4638 | 0.0067 | 0.8691 | 0.7472 |        |        |        |        |        |        |        |
| T06-Black  | 0.6730 | 0.9793 | 0.0398 | 0.6623 | 0.3681 | 0.5167 |        |        |        |        |        |        |
| T07-Red    | 0.5840 | 0.8659 | 0.0555 | 0.5818 | 0.3145 | 0.4429 | 0.8996 |        |        |        |        |        |
| T08-Red    | 0.8969 | 0.6338 | 0.0300 | 0.9424 | 0.7514 | 0.9490 | 0.6500 | 0.5795 |        |        |        |        |
| T09-Yellow | 0.5351 | 0.8633 | 0.0287 | 0.5462 | 0.2589 | 0.3800 | 0.9065 | 0.9778 | 0.5561 |        |        |        |
| T10-Yellow | 0.7461 | 0.8799 | 0.0161 | 0.7297 | 0.3846 | 0.5570 | 0.8799 | 0.7723 | 0.7103 | 0.7503 |        |        |
| T11-Green  | 0.7640 | 0.4382 | 0.0065 | 0.8360 | 0.7831 | 0.9613 | 0.4919 | 0.4213 | 0.9196 | 0.3586 | 0.5276 |        |
| T12-Green  | 0.7138 | 0.3403 | 0.0029 | 0.8061 | 0.7635 | 0.9439 | 0.4274 | 0.3576 | 0.9047 | 0.2632 | 0.4382 | 0.9893 |

Note: After drinking T03, the colon blue tea, the temperature rise above colon was significant, comparing to those after drinking other tea.

| Male Stomach |        |        |        |        |        |        |        |        |        |        |        |        |
|--------------|--------|--------|--------|--------|--------|--------|--------|--------|--------|--------|--------|--------|
|              | T01    | T02    | T03    | T04a   | T04b   | T05    | T06    | T07    | T08    | T09    | T10    | T11    |
| T01-White    |        | 0.4427 | 0.9135 | 0.7170 | 0.2580 |        |        |        |        |        |        |        |
| T02-White    |        |        | 0.6236 | 0.8777 | 0.0710 |        |        |        |        |        |        |        |
| T03-Blue     |        |        |        | 0.8127 | 0.2835 |        |        |        |        |        |        |        |
| T04a-Blue    |        |        |        |        | 0.2233 |        |        |        |        |        |        |        |
| T05-Black    | 0.4863 | 0.9532 | 0.6585 | 0.9079 | 0.0821 |        |        |        |        |        |        |        |
| T06-Black    | 0.7622 | 0.6176 | 0.8973 | 0.8722 | 0.1539 | 0.6692 |        |        |        |        |        |        |
| T07-Red      | 0.4319 | 0.9213 | 0.5935 | 0.8330 | 0.0759 | 0.8822 | 0.5888 |        |        |        |        |        |
| T08-Red      | 0.6657 | 0.8501 | 0.7868 | 0.9998 | 0.1621 | 0.8877 | 0.8455 | 0.8002 |        |        |        |        |
| T09-Yellow   | 0.5230 | 0.8630 | 0.7020 | 0.9571 | 0.0856 | 0.9160 | 0.7259 | 0.8008 | 0.9469 |        |        |        |
| T10-Yellow   | 0.6413 | 0.8051 | 0.7830 | 0.9859 | 0.1315 | 0.8500 | 0.8421 | 0.7550 | 0.9834 | 0.9162 |        |        |
| T11-Green    | 0.7529 | 0.7686 | 0.8613 | 0.9344 | 0.2019 | 0.8054 | 0.9373 | 0.7264 | 0.9246 | 0.8586 | 0.9334 |        |
| T12-Green    | 0.3887 | 0.8611 | 0.5542 | 0.7948 | 0.0656 | 0.8237 | 0.5352 | 0.9465 | 0.7542 | 0.7390 | 0.7025 | 0.6827 |

| Male Thymus |        |        |        |        |        |        |        |        |        |        |        |        |
|-------------|--------|--------|--------|--------|--------|--------|--------|--------|--------|--------|--------|--------|
|             | T01    | T02    | T03    | T04a   | T04b   | T05    | T06    | T07    | T08    | T09    | T10    | T11    |
| T01-White   |        | 0.3766 | 0.9289 | 0.0368 | 0.1974 | 0.0000 |        |        |        |        |        |        |
| T02-White   |        |        | 0.3537 | 0.1546 | 0.5036 | 0.0000 |        |        |        |        |        |        |
| T03-Blue    |        |        |        | 0.0397 | 0.1872 | 0.0000 |        |        |        |        |        |        |
| T04a-Blue   |        |        |        |        | 0.6724 | 0.0010 |        |        |        |        |        |        |
| T04b-Blue   |        |        |        |        |        | 0.0037 |        |        |        |        |        |        |
| T06-Black   | 0.9518 | 0.4640 | 0.8885 | 0.0654 | 0.2439 | 0.0000 |        |        |        |        |        |        |
| T07-Red     | 0.4912 | 0.8283 | 0.4569 | 0.1072 | 0.4113 | 0.0000 | 0.5780 |        |        |        |        |        |
| T08-Red     | 0.9367 | 0.6157 | 0.8880 | 0.1755 | 0.3609 | 0.0013 | 0.9741 | 0.7092 |        |        |        |        |
| T09-Yellow  | 0.1541 | 0.5759 | 0.1542 | 0.3001 | 0.7523 | 0.0000 | 0.2307 | 0.4288 | 0.4103 |        |        |        |
| T10-Yellow  | 0.4869 | 0.7895 | 0.4530 | 0.0832 | 0.3830 | 0.0000 | 0.5804 | 0.9722 | 0.7178 | 0.3697 |        |        |
| T11-Green   | 0.6807 | 0.1441 | 0.7734 | 0.0070 | 0.0928 | 0.0000 | 0.6643 | 0.2154 | 0.7268 | 0.0323 | 0.1951 |        |
| T12-Green   | 0.3864 | 0.9929 | 0.3624 | 0.1573 | 0.5026 | 0.0000 | 0.4725 | 0.8376 | 0.6212 | 0.5758 | 0.8001 | 0.1526 |

Note: After drinking T05, the thymus black tea, the temperature rise above thymus was extremely significant, comparing to those after drinking other tea.

| Male Liver |        |        |        |        |        |        |        |        |        |        |        |        |
|------------|--------|--------|--------|--------|--------|--------|--------|--------|--------|--------|--------|--------|
|            | T01    | T02    | T03    | T04a   | T04b   | T05    | T06    | T07    | T08    | T09    | T10    | T11    |
| T01-White  |        | 0.8878 | 0.8868 | 0.8577 | 0.3058 | 0.5427 | 0.0122 |        |        |        |        |        |
| T02-White  |        |        | 0.7899 | 0.7302 | 0.3350 | 0.6127 | 0.0113 |        |        |        |        |        |
| T03-Blue   |        |        |        | 0.9992 | 0.3296 | 0.5144 | 0.0227 |        |        |        |        |        |
| T04a-Blue  |        |        |        |        | 0.1846 | 0.3949 | 0.0057 |        |        |        |        |        |
| T04b-Blue  |        |        |        |        |        | 0.6721 | 0.0412 |        |        |        |        |        |
| T05-Black  |        |        |        |        |        |        | 0.0280 |        |        |        |        |        |
| T07-Red    | 0.3130 | 0.3461 | 0.3237 | 0.2078 | 0.8954 | 0.6329 | 0.0805 |        |        |        |        |        |
| T08-Red    | 0.3263 | 0.3615 | 0.3334 | 0.2208 | 0.9075 | 0.6480 | 0.0839 | 0.9918 |        |        |        |        |
| T09-Yellow | 0.8869 | 0.9897 | 0.7851 | 0.7121 | 0.2611 | 0.5629 | 0.0069 | 0.2936 | 0.3114 |        |        |        |
| T10-Yellow | 0.8404 | 0.9354 | 0.7563 | 0.7029 | 0.4698 | 0.7223 | 0.0257 | 0.4550 | 0.4676 | 0.9216 |        |        |
| T11-Green  | 0.8479 | 0.9356 | 0.7662 | 0.7232 | 0.5238 | 0.7529 | 0.0397 | 0.5000 | 0.5108 | 0.9238 | 0.9949 |        |
| T12-Green  | 0.4839 | 0.5437 | 0.4655 | 0.3490 | 0.7921 | 0.9006 | 0.0412 | 0.7330 | 0.7460 | 0.4941 | 0.6522 | 0.6866 |

Note: After drinking T06, the liver black tea, the temperature rise above liver was significant, comparing to those after drinking other tea.

| Male Thyroid |        |        |        |        |        |        |        |        |        |        |        |        |
|--------------|--------|--------|--------|--------|--------|--------|--------|--------|--------|--------|--------|--------|
|              | T01    | T02    | T03    | T04a   | T04b   | T05    | T06    | T07    | T08    | T09    | T10    | T11    |
| T01-White    |        | 0.3276 | 0.7424 | 0.3573 | 0.5712 | 0.5062 | 0.7139 | 0.4813 | 0.6193 |        |        |        |
| T02-White    |        |        | 0.4538 | 0.0110 | 0.0450 | 0.0054 | 0.4687 | 0.7147 | 0.0303 |        |        |        |
| T03-Blue     |        |        |        | 0.1398 | 0.2932 | 0.1973 | 0.9690 | 0.6750 | 0.3056 |        |        |        |
| T04a-Blue    |        |        |        |        | 0.6677 | 0.5978 | 0.1211 | 0.0351 | 0.5318 |        |        |        |
| T04b-Blue    |        |        |        |        |        | 0.9817 | 0.2659 | 0.1079 | 0.8899 |        |        |        |
| T05-Black    |        |        |        |        |        |        | 0.1677 | 0.0345 | 0.8297 |        |        |        |
| T06-Black    |        |        |        |        |        |        |        | 0.6995 | 0.2736 |        |        |        |
| T08-Red      |        |        |        |        |        |        |        | 0.0941 |        |        |        |        |
| T09-Yellow   | 0.1839 | 0.5693 | 0.2341 | 0.0022 | 0.0127 | 0.0002 | 0.2369 | 0.3687 | 0.0049 |        |        |        |
| T10-Yellow   | 0.2973 | 0.9087 | 0.4080 | 0.0094 | 0.0387 | 0.0047 | 0.4206 | 0.6429 | 0.0256 | 0.6701 |        |        |
| T11-Green    | 0.9999 | 0.1935 | 0.6858 | 0.2432 | 0.4784 | 0.3574 | 0.6494 | 0.3630 | 0.5157 | 0.0691 | 0.1687 |        |
| T12-Green    | 0.3363 | 0.9891 | 0.4665 | 0.0126 | 0.0492 | 0.0073 | 0.4820 | 0.7296 | 0.0347 | 0.5718 | 0.9003 | 0.2048 |

**Infrared imageries of human body activated by tea match the hypothesis of meridian system**

**(Supplementary Table 4 Continued)**

| <b>Male Gallbladder</b> |        |        |        |        |        |        |        |        |        |        |        |        |
|-------------------------|--------|--------|--------|--------|--------|--------|--------|--------|--------|--------|--------|--------|
|                         | T01    | T02    | T03    | T04a   | T04b   | T05    | T06    | T07    | T08    | T09    | T10    | T11    |
| T01-White               |        | 0.8381 | 0.6362 | 0.8472 | 0.8631 | 0.6520 | 0.3707 | 0.5989 | 0.1917 |        |        |        |
| T02-White               |        |        | 0.8041 | 0.6719 | 0.7051 | 0.8280 | 0.4943 | 0.7521 | 0.1374 |        |        |        |
| T03-Blue                |        |        |        | 0.4415 | 0.5038 | 0.9641 | 0.6199 | 0.9263 | 0.0672 |        |        |        |
| T04a-Blue               |        |        |        |        | 0.9989 | 0.4443 | 0.2238 | 0.4254 | 0.1943 |        |        |        |
| T04b-Blue               |        |        |        |        |        | 0.5129 | 0.2796 | 0.4790 | 0.2443 |        |        |        |
| T05-Black               |        |        |        |        |        |        | 0.5777 | 0.8909 | 0.0632 |        |        |        |
| T06-Black               |        |        |        |        |        |        |        | 0.7073 | 0.0329 |        |        |        |
| T07-Red                 |        |        |        |        |        |        |        |        | 0.0716 |        |        |        |
| T09-Yellow              | 0.7299 | 0.9167 | 0.8550 | 0.5111 | 0.5794 | 0.8856 | 0.4849 | 0.7911 | 0.0714 |        |        |        |
| T10-Yellow              | 0.8632 | 0.7019 | 0.4952 | 0.9977 | 0.9969 | 0.5036 | 0.2704 | 0.4715 | 0.2332 | 0.5707 |        |        |
| T11-Green               | 0.6828 | 0.5454 | 0.3689 | 0.7812 | 0.8050 | 0.3722 | 0.2006 | 0.3556 | 0.3707 | 0.4212 | 0.7982 |        |
| T12-Green               | 0.4412 | 0.3255 | 0.1717 | 0.4859 | 0.5500 | 0.1638 | 0.0822 | 0.1779 | 0.4833 | 0.1872 | 0.5363 | 0.7594 |
| <b>Male Heart</b>       |        |        |        |        |        |        |        |        |        |        |        |        |
|                         | T01    | T02    | T03    | T04a   | T04b   | T05    | T06    | T07    | T08    | T09    | T10    | T11    |
| T01-White               |        | 0.5801 | 0.7087 | 0.1850 | 0.9512 | 0.7038 | 0.7908 | 0.8602 | 0.8948 | 0.0801 |        |        |
| T02-White               |        |        | 0.8872 | 0.0778 | 0.6518 | 0.3580 | 0.4116 | 0.6983 | 0.4944 | 0.0311 |        |        |
| T03-Blue                |        |        |        | 0.1270 | 0.7705 | 0.4753 | 0.5366 | 0.8279 | 0.6212 | 0.0594 |        |        |
| T04a-Blue               |        |        |        |        | 0.2052 | 0.3151 | 0.2557 | 0.1369 | 0.2223 | 0.6911 |        |        |
| T04b-Blue               |        |        |        |        |        | 0.6845 | 0.7621 | 0.9210 | 0.8557 | 0.1004 |        |        |
| T05-Black               |        |        |        |        |        |        | 0.8997 | 0.5755 | 0.8023 | 0.1490 |        |        |
| T06-Black               |        |        |        |        |        |        |        | 0.6536 | 0.8957 | 0.1132 |        |        |
| T07-Red                 |        |        |        |        |        |        |        |        | 0.7562 | 0.0559 |        |        |
| T08-Red                 |        |        |        |        |        |        |        |        |        | 0.0986 |        |        |
| T10-Yellow              | 0.5443 | 0.9929 | 0.8738 | 0.0571 | 0.6247 | 0.3144 | 0.3669 | 0.6690 | 0.4540 | 0.0196 |        |        |
| T11-Green               | 0.7441 | 0.7718 | 0.9098 | 0.0844 | 0.8200 | 0.4533 | 0.5263 | 0.8923 | 0.6345 | 0.0284 | 0.7435 |        |
| T12-Green               | 0.7505 | 0.7658 | 0.9039 | 0.0853 | 0.8259 | 0.4583 | 0.5320 | 0.8991 | 0.6406 | 0.0285 | 0.7369 | 0.9925 |
| <b>Male Kidney</b>      |        |        |        |        |        |        |        |        |        |        |        |        |
|                         | T01    | T02    | T03    | T04a   | T04b   | T05    | T06    | T07    | T08    | T09    | T10    | T11    |
| T01-White               |        | 0.6999 | 0.9993 | 0.9775 | 0.5818 | 0.7125 | 0.6534 | 0.8159 | 0.7789 | 0.5217 | 0.0031 |        |
| T02-White               |        |        | 0.6819 | 0.7410 | 0.3399 | 0.4030 | 0.9688 | 0.8822 | 0.9364 | 0.2561 | 0.0060 |        |
| T03-Blue                |        |        |        | 0.9762 | 0.5588 | 0.6891 | 0.6296 | 0.8054 | 0.7676 | 0.4850 | 0.0018 |        |
| T04a-Blue               |        |        |        |        | 0.6823 | 0.8061 | 0.7100 | 0.8316 | 0.7997 | 0.6580 | 0.0206 |        |
| T04b-Blue               |        |        |        |        |        | 0.7894 | 0.2914 | 0.4307 | 0.4181 | 0.9909 | 0.0007 |        |
| T05-Black               |        |        |        |        |        |        | 0.3359 | 0.5208 | 0.5034 | 0.7430 | 0.0002 |        |
| T06-Black               |        |        |        |        |        |        |        | 0.8443 | 0.9042 | 0.1937 | 0.0036 |        |
| T07-Red                 |        |        |        |        |        |        |        |        | 0.9526 | 0.3551 | 0.0053 |        |
| T08-Red                 |        |        |        |        |        |        |        |        |        | 0.3513 | 0.0097 |        |
| T09-Yellow              |        |        |        |        |        |        |        |        |        |        | 0.0000 |        |
| T11-Green               | 0.9663 | 0.7170 | 0.9647 | 0.9506 | 0.5351 | 0.6576 | 0.6672 | 0.8399 | 0.8001 | 0.4605 | 0.0022 |        |
| T12-Green               | 0.6087 | 0.3425 | 0.5830 | 0.7145 | 0.9361 | 0.8414 | 0.2862 | 0.4428 | 0.4303 | 0.9316 | 0.0003 | 0.5569 |
| <b>Male Duodenum</b>    |        |        |        |        |        |        |        |        |        |        |        |        |
|                         | T02    | T03    | T04a   | T04b   | T05    | T06    | T07    | T08    | T09    | T10    | T11    | T12    |
| T01-White               | 0.4279 | 0.4443 | 0.5177 | 0.8929 | 0.6579 | 0.2324 | 0.2408 | 0.7146 | 0.2145 | 0.4017 | 0.0773 | 0.8429 |
| T02-White               |        | 0.9966 | 0.9680 | 0.5818 | 0.6851 | 0.6526 | 0.7271 | 0.7341 | 0.6743 | 0.9573 | 0.0199 | 0.2991 |
| T03-Blue                |        |        | 0.9714 | 0.5906 | 0.6958 | 0.6681 | 0.7430 | 0.7395 | 0.6923 | 0.9624 | 0.0225 | 0.3196 |
| T04a-Blue               |        |        |        | 0.6292 | 0.7328 | 0.7578 | 0.8290 | 0.7573 | 0.7884 | 0.9993 | 0.0430 | 0.4143 |
| T04b-Blue               |        |        |        |        | 0.8135 | 0.3599 | 0.3898 | 0.8396 | 0.3585 | 0.5533 | 0.0838 | 0.7567 |
| T05-Black               |        |        |        |        |        | 0.3914 | 0.4216 | 0.9968 | 0.3792 | 0.6468 | 0.0333 | 0.4926 |
| T06-Black               |        |        |        |        |        |        |        | 0.8859 | 0.4687 | 0.9396 | 0.0100 | 0.1492 |
| T07-Red                 |        |        |        |        |        |        |        |        | 0.5130 | 0.9391 | 0.0094 | 0.1444 |
| T08-Red                 |        |        |        |        |        |        |        |        | 0.4745 | 0.7007 | 0.0532 | 0.5777 |
| T09-Yellow              |        |        |        |        |        |        |        |        |        | 0.7190 | 0.0083 | 0.1255 |
| T10-Yellow              |        |        |        |        |        |        |        |        |        |        | 0.0185 | 0.2785 |
| T11-Green               |        |        |        |        |        |        |        |        |        |        |        | 0.0929 |
| <b>Male Bladder</b>     |        |        |        |        |        |        |        |        |        |        |        |        |
|                         | T02    | T03    | T04a   | T04b   | T05    | T06    | T07    | T08    | T09    | T10    | T11    | T12    |
| T01-White               | 0.8915 | 0.4260 | 0.9686 | 0.1036 | 0.3477 | 0.6921 | 0.4326 | 0.7478 | 0.1731 | 0.3140 | 0.2423 | 0.3319 |
| T02-White               |        | 0.4737 | 0.8758 | 0.1165 | 0.3983 | 0.7669 | 0.4975 | 0.8238 | 0.1953 | 0.3550 | 0.2700 | 0.3752 |
| T03-Blue                |        |        | 0.4473 | 0.6113 | 0.8871 | 0.6916 | 0.7736 | 0.6603 | 0.9166 | 0.9518 | 0.7088 | 0.9783 |
| T04a-Blue               |        |        |        | 0.1444 | 0.4055 | 0.6970 | 0.4875 | 0.7463 | 0.2454 | 0.3532 | 0.2657 | 0.3707 |
| T04b-Blue               |        |        |        |        | 0.3793 | 0.3074 | 0.2740 | 0.2934 | 0.5396 | 0.6058 | 0.9578 | 0.5764 |
| T05-Black               |        |        |        |        |        | 0.7228 | 0.8268 | 0.6836 | 0.6910 | 0.8032 | 0.5605 | 0.8368 |
| T06-Black               |        |        |        |        |        |        |        | 0.8375 | 0.9560 | 0.5124 | 0.6078 | 0.4417 |
| T07-Red                 |        |        |        |        |        |        |        |        | 0.7913 | 0.5047 | 0.6682 | 0.4694 |
| T08-Red                 |        |        |        |        |        |        |        |        |        | 0.4850 | 0.5776 | 0.6006 |
| T09-Yellow              |        |        |        |        |        |        |        |        |        |        | 0.9668 | 0.7107 |
| T10-Yellow              |        |        |        |        |        |        |        |        |        |        |        | 0.9694 |
| T11-Green               |        |        |        |        |        |        |        |        |        |        |        | 0.7000 |

Note: After drinking T10, the kidney yellow tea, the temperature rise above kidneys was significant, comparing to those after drinking other tea.

Note: After drinking T11, the duodenum green tea, the temperature rise above duodenum was significant, comparing to those after drinking other tea.

Infrared imageries of human body activated by tea match the hypothesis of meridian system

(Supplementary Table 4 Continued)

| Female     |        | Finger1 |        |        |        |        |        |        |        |        |        |        |        |
|------------|--------|---------|--------|--------|--------|--------|--------|--------|--------|--------|--------|--------|--------|
| T01b-White | 0.8083 |         |        |        |        |        |        |        |        |        |        |        |        |
| T02-White  | 0.7296 | 0.5197  |        |        |        |        |        |        |        |        |        |        |        |
| T03-Blue   | 0.7460 | 0.5946  | 0.9427 |        |        |        |        |        |        |        |        |        |        |
| T04a-Blue  | 0.7043 | 0.5085  | 0.9537 | 0.9778 |        |        |        |        |        |        |        |        |        |
| T04b-Blue  | 0.9131 | 0.7375  | 0.8471 | 0.8313 | 0.8168 |        |        |        |        |        |        |        |        |
| T05-Black  | 0.5284 | 0.3620  | 0.7239 | 0.8469 | 0.7774 | 0.6394 |        |        |        |        |        |        |        |
| T06-Black  | 0.1338 | 0.0728  | 0.1835 | 0.3407 | 0.2213 | 0.1983 | 0.3529 |        |        |        |        |        |        |
| T07-Red    | 0.7452 | 0.9002  | 0.5136 | 0.5644 | 0.5009 | 0.6873 | 0.3747 | 0.0976 |        |        |        |        |        |
| T08-Red    | 0.9362 | 0.8738  | 0.6630 | 0.6962 | 0.6418 | 0.8548 | 0.4759 | 0.1151 | 0.7992 |        |        |        |        |
| T09-Yellow | 0.4559 | 0.2814  | 0.6479 | 0.8090 | 0.7138 | 0.5817 | 0.9644 | 0.3260 | 0.3168 | 0.4022 |        |        |        |
| T10-Yellow | 0.0943 | 0.0382  | 0.1234 | 0.3298 | 0.1704 | 0.1675 | 0.3193 | 0.9047 | 0.0728 | 0.0777 | 0.2679 |        |        |
| T11-Green  | 0.4276 | 0.5613  | 0.1965 | 0.3302 | 0.2061 | 0.4048 | 0.1364 | 0.0198 | 0.7308 | 0.4787 | 0.0798 | 0.0055 |        |
| T12-Green  | 0.0939 | 0.1236  | 0.0327 | 0.0879 | 0.0367 | 0.0988 | 0.0241 | 0.0034 | 0.2255 | 0.1083 | 0.0126 | 0.0011 | 0.2695 |
|            | T01a   | T01b    | T02    | T03    | T04a   | T04b   | T05    | T06    | T07    | T08    | T09    | T10    | T11    |
| Female     |        | Finger2 |        |        |        |        |        |        |        |        |        |        |        |
| T01b-White | 0.8603 |         |        |        |        |        |        |        |        |        |        |        |        |
| T02-White  | 0.7488 | 0.6274  |        |        |        |        |        |        |        |        |        |        |        |
| T03-Blue   | 0.5472 | 0.4611  | 0.7327 |        |        |        |        |        |        |        |        |        |        |
| T04a-Blue  | 0.7017 | 0.5916  | 0.9281 | 0.8094 |        |        |        |        |        |        |        |        |        |
| T04b-Blue  | 0.9981 | 0.8674  | 0.7712 | 0.5767 | 0.7249 |        |        |        |        |        |        |        |        |
| T05-Black  | 0.5018 | 0.4179  | 0.6967 | 0.9999 | 0.7868 | 0.5403 |        |        |        |        |        |        |        |
| T06-Black  | 0.3517 | 0.2936  | 0.5000 | 0.8116 | 0.5968 | 0.3975 | 0.7836 |        |        |        |        |        |        |
| T07-Red    | 0.5582 | 0.6921  | 0.3656 | 0.2664 | 0.3502 | 0.5802 | 0.2262 | 0.1498 |        |        |        |        |        |
| T08-Red    | 0.9252 | 0.8049  | 0.8590 | 0.6572 | 0.8088 | 0.9311 | 0.6295 | 0.4832 | 0.5384 |        |        |        |        |
| T09-Yellow | 0.1211 | 0.1063  | 0.1698 | 0.4110 | 0.2470 | 0.1623 | 0.3367 | 0.4843 | 0.0489 | 0.2229 |        |        |        |
| T10-Yellow | 0.0159 | 0.0173  | 0.0160 | 0.1037 | 0.0414 | 0.0332 | 0.0482 | 0.0801 | 0.0077 | 0.0568 | 0.2848 |        |        |
| T11-Green  | 0.7547 | 0.8981  | 0.5267 | 0.3836 | 0.4989 | 0.7683 | 0.3381 | 0.2301 | 0.7837 | 0.7119 | 0.0778 | 0.0121 |        |
| T12-Green  | 0.6953 | 0.5815  | 0.9362 | 0.7868 | 0.9874 | 0.7216 | 0.7578 | 0.5554 | 0.3342 | 0.8103 | 0.2007 | 0.0226 | 0.4849 |
|            | T01a   | T01b    | T02    | T03    | T04a   | T04b   | T05    | T06    | T07    | T08    | T09    | T10    | T11    |
| Female     |        | Finger3 |        |        |        |        |        |        |        |        |        |        |        |
| T01b-White | 0.8971 |         |        |        |        |        |        |        |        |        |        |        |        |
| T02-White  | 0.9118 | 0.8140  |        |        |        |        |        |        |        |        |        |        |        |
| T03-Blue   | 0.2062 | 0.2752  | 0.1661 |        |        |        |        |        |        |        |        |        |        |
| T04a-Blue  | 0.4163 | 0.5114  | 0.3538 | 0.6708 |        |        |        |        |        |        |        |        |        |
| T04b-Blue  | 0.9888 | 0.9094  | 0.9024 | 0.2173 | 0.4306 |        |        |        |        |        |        |        |        |
| T05-Black  | 0.9417 | 0.9459  | 0.8466 | 0.2127 | 0.4351 | 0.9549 |        |        |        |        |        |        |        |
| T06-Black  | 0.0899 | 0.1311  | 0.0686 | 0.6764 | 0.4013 | 0.0968 | 0.0910 |        |        |        |        |        |        |
| T07-Red    | 0.3733 | 0.4646  | 0.3145 | 0.7267 | 0.9406 | 0.3872 | 0.3895 | 0.4451 |        |        |        |        |        |
| T08-Red    | 0.1025 | 0.1469  | 0.0791 | 0.7156 | 0.4325 | 0.1099 | 0.1041 | 0.9590 | 0.4780 |        |        |        |        |
| T09-Yellow | 0.6240 | 0.7725  | 0.5122 | 0.2997 | 0.5994 | 0.6472 | 0.6616 | 0.1287 | 0.5390 | 0.1472 |        |        |        |
| T10-Yellow | 0.2375 | 0.3294  | 0.1837 | 0.8084 | 0.8204 | 0.2530 | 0.2438 | 0.4850 | 0.8856 | 0.5229 | 0.3549 |        |        |
| T11-Green  | 0.4196 | 0.3836  | 0.4587 | 0.0744 | 0.1592 | 0.4201 | 0.3725 | 0.0317 | 0.1411 | 0.0363 | 0.2048 | 0.0804 |        |
| T12-Green  | 0.2297 | 0.2177  | 0.2521 | 0.0277 | 0.0724 | 0.2358 | 0.1818 | 0.0096 | 0.0618 | 0.0116 | 0.0564 | 0.0220 | 0.8628 |
|            | T01a   | T01b    | T02    | T03    | T04a   | T04b   | T05    | T06    | T07    | T08    | T09    | T10    | T11    |
| Female     |        | Finger4 |        |        |        |        |        |        |        |        |        |        |        |
| T01a-White | 0.7083 | 0.8328  | 0.4591 | 0.8045 | 0.8780 | 0.2761 | 0.3295 | 0.5980 | 0.3271 | 0.2911 | 0.0158 | 0.6386 | 0.6348 |
| T01b-White |        | 0.5392  | 0.2731 | 0.9078 | 0.6043 | 0.1476 | 0.1713 | 0.8559 | 0.5349 | 0.1385 | 0.0046 | 0.9217 | 0.9161 |
| T02-White  |        |         | 0.5564 | 0.6388 | 0.9672 | 0.3377 | 0.4066 | 0.4500 | 0.2093 | 0.3618 | 0.0162 | 0.4746 | 0.4722 |
| T03-Blue   |        |         |        | 0.3382 | 0.5634 | 0.7416 | 0.8763 | 0.2315 | 0.0997 | 0.8635 | 0.1395 | 0.2373 | 0.2366 |
| T04a-Blue  |        |         |        |        | 0.6957 | 0.1939 | 0.2286 | 0.7762 | 0.4755 | 0.1951 | 0.0097 | 0.8334 | 0.8284 |
| T04b-Blue  |        |         |        |        |        | 0.3588 | 0.4300 | 0.5101 | 0.2701 | 0.3947 | 0.0305 | 0.5416 | 0.5386 |
| T05-Black  |        |         |        |        |        |        | 0.8401 | 0.1271 | 0.0464 | 0.8340 | 0.2619 | 0.1256 | 0.1256 |
| T06-Black  |        |         |        |        |        |        |        | 0.1474 | 0.0498 | 0.9947 | 0.1388 | 0.1445 | 0.1446 |
| T07-Red    |        |         |        |        |        |        |        |        | 0.6910 | 0.1215 | 0.0056 | 0.9284 | 0.9344 |
| T08-Red    |        |         |        |        |        |        |        |        |        | 0.0345 | 0.0007 | 0.6019 | 0.6090 |
| T09-Yellow |        |         |        |        |        |        |        |        |        |        | 0.1040 | 0.1147 | 0.1153 |
| T10-Yellow |        |         |        |        |        |        |        |        |        |        |        | 0.0038 | 0.0040 |
| T11-Green  |        |         |        |        |        |        |        |        |        |        |        |        | 0.9939 |
|            | T01b   | T02     | T03    | T04a   | T04b   | T05    | T06    | T07    | T08    | T09    | T10    | T11    | T12    |
| Female     |        | Finger5 |        |        |        |        |        |        |        |        |        |        |        |
| T01a-White | 0.7101 | 0.3121  | 0.3243 | 0.5431 | 0.9594 | 0.7218 | 0.6258 | 0.0635 | 0.5772 | 0.0301 | 0.1169 | 0.9382 | 0.6108 |
| T01b-White |        | 0.1419  | 0.4494 | 0.3432 | 0.7732 | 0.4258 | 0.3775 | 0.0971 | 0.7494 | 0.0041 | 0.0291 | 0.7119 | 0.8381 |
| T02-White  |        |         | 0.0845 | 0.8118 | 0.3239 | 0.4591 | 0.6242 | 0.0085 | 0.2032 | 0.2882 | 0.6666 | 0.1963 | 0.1532 |
| T03-Blue   |        |         |        | 0.1684 | 0.3643 | 0.2007 | 0.1816 | 0.4975 | 0.7406 | 0.0144 | 0.0365 | 0.3078 | 0.5878 |
| T04a-Blue  |        |         |        |        | 0.5348 | 0.7272 | 0.8572 | 0.0305 | 0.3278 | 0.2893 | 0.5531 | 0.4561 | 0.3122 |
| T04b-Blue  |        |         |        |        |        | 0.7028 | 0.6138 | 0.0833 | 0.6179 | 0.0471 | 0.1423 | 0.9909 | 0.6658 |
| T05-Black  |        |         |        |        |        |        | 0.8562 | 0.0276 | 0.4100 | 0.0388 | 0.1763 | 0.5986 | 0.3884 |
| T06-Black  |        |         |        |        |        |        |        | 0.0276 | 0.3664 | 0.1236 | 0.3375 | 0.5172 | 0.3452 |
| T07-Red    |        |         |        |        |        |        |        |        | 0.3189 | 0.0006 | 0.0022 | 0.0477 | 0.1783 |
| T08-Red    |        |         |        |        |        |        |        |        |        | 0.0500 | 0.1083 | 0.5806 | 0.8813 |
| T09-Yellow |        |         |        |        |        |        |        |        |        |        | 0.4031 | 0.0026 | 0.0158 |
| T10-Yellow |        |         |        |        |        |        |        |        |        |        |        | 0.0316 | 0.0539 |
| T11-Green  |        |         |        |        |        |        |        |        |        |        |        |        | 0.6068 |

Notes: The darkness of the bottom color stands for the strength of the significance. T01, Silver White Needles; T02, Old Eyebrows; T03, Titkuanym; T04a, Red Garment; T04b, Phoenix Unique; T05, Lapsang Souchong; T06, Red Grape; T07, Tangerine Pu'erh; T08, Golden Fungi; T09, Golden Buns; T10, Golden Bricks; T11, Monkey Champion; T12, Dragon Well.

Infrared imageries of human body activated by tea match the hypothesis of meridian system

(Supplementary Table 4 Continued)

| Female Thenar      |        |        |        |        |        |        |        |        |        |        |        |        |        |
|--------------------|--------|--------|--------|--------|--------|--------|--------|--------|--------|--------|--------|--------|--------|
| T01b-White         | 0.3561 |        |        |        |        |        |        |        |        |        |        |        |        |
| T02-White          | 0.8428 | 0.5099 |        |        |        |        |        |        |        |        |        |        |        |
| T03-Blue           | 0.3569 | 0.0685 | 0.2882 |        |        |        |        |        |        |        |        |        |        |
| T04a-Blue          | 0.1833 | 0.5669 | 0.2747 | 0.0368 |        |        |        |        |        |        |        |        |        |
| T04b-Blue          | 0.9682 | 0.4197 | 0.8827 | 0.3696 | 0.2244 |        |        |        |        |        |        |        |        |
| T05-Black          | 0.7655 | 0.4553 | 0.9556 | 0.1917 | 0.2261 | 0.8206 |        |        |        |        |        |        |        |
| T06-Black          | 0.6901 | 0.1709 | 0.5633 | 0.5690 | 0.0877 | 0.6827 | 0.4444 |        |        |        |        |        |        |
| T07-Red            | 0.2322 | 0.7534 | 0.3563 | 0.0400 | 0.7666 | 0.2885 | 0.2887 | 0.1022 |        |        |        |        |        |
| T08-Red            | 0.6200 | 0.7634 | 0.7687 | 0.1929 | 0.4450 | 0.6668 | 0.7737 | 0.3899 | 0.5767 |        |        |        |        |
| T09-Yellow         | 0.8683 | 0.3607 | 0.9426 | 0.2290 | 0.1776 | 0.9163 | 0.8680 | 0.5227 | 0.2191 | 0.6802 |        |        |        |
| T10-Yellow         | 0.4907 | 0.0932 | 0.3948 | 0.7653 | 0.0496 | 0.4991 | 0.2713 | 0.7654 | 0.0529 | 0.2641 | 0.3259 |        |        |
| T11-Green          | 0.8855 | 0.2893 | 0.7397 | 0.4385 | 0.1487 | 0.8625 | 0.6484 | 0.8060 | 0.1856 | 0.5354 | 0.7420 | 0.5950 |        |
| T12-Green          | 0.7695 | 0.2903 | 0.6529 | 0.6182 | 0.1580 | 0.7551 | 0.5777 | 0.9751 | 0.2003 | 0.4854 | 0.6496 | 0.7875 | 0.8651 |
| Female Palm center |        |        |        |        |        |        |        |        |        |        |        |        |        |
| T01a-White         |        | 0.1770 | 0.2662 | 0.2206 | 0.0644 | 0.3654 | 0.0127 |        |        |        |        |        |        |
| T01b-White         |        |        | 0.7162 | 0.0079 | 0.5545 | 0.5989 | 0.2186 |        |        |        |        |        |        |
| T02-White          |        |        |        | 0.0124 | 0.3212 | 0.8441 | 0.0711 |        |        |        |        |        |        |
| T03-Blue           |        |        |        |        |        | 0.0250 | 0.0002 |        |        |        |        |        |        |
| T04a-Blue          |        |        |        | 0.0019 |        | 0.2644 | 0.6011 |        |        |        |        |        |        |
| T04b-Blue          |        |        |        | 0.0250 |        |        | 0.0645 |        |        |        |        |        |        |
| T05-Black          |        |        |        | 0.0002 |        |        |        |        |        |        |        |        |        |
| T06-Black          | 0.3016 | 0.7060 | 0.9702 | 0.0181 | 0.3324 | 0.8809 | 0.0924 |        |        |        |        |        |        |
| T07-Red            | 0.2109 | 0.9392 | 0.7878 | 0.0114 | 0.5169 | 0.6655 | 0.2072 | 0.7731 |        |        |        |        |        |
| T08-Red            | 0.9955 | 0.1773 | 0.2662 | 0.2248 | 0.0651 | 0.3645 | 0.0135 | 0.3012 | 0.2109 |        |        |        |        |
| T09-Yellow         | 0.0047 | 0.0959 | 0.0191 | 0.0001 | 0.3584 | 0.0220 | 0.5797 | 0.0329 | 0.0956 | 0.0053 |        |        |        |
| T10-Yellow         | 0.1409 | 0.9906 | 0.6697 | 0.0041 | 0.5169 | 0.5483 | 0.1467 | 0.6643 | 0.9236 | 0.1419 | 0.0412 |        |        |
| T11-Green          | 0.2898 | 0.7484 | 0.9876 | 0.0181 | 0.3676 | 0.8448 | 0.1158 | 0.9609 | 0.8137 | 0.2894 | 0.0461 | 0.7125 |        |
| T12-Green          | 0.6580 | 0.3448 | 0.5042 | 0.0857 | 0.1382 | 0.6420 | 0.0314 | 0.5471 | 0.3964 | 0.6550 | 0.0119 | 0.2952 | 0.5245 |
| Female Hypothenar  |        |        |        |        |        |        |        |        |        |        |        |        |        |
| T01a-White         |        | 0.4895 | 0.3080 | 0.6033 | 0.4443 | 0.3950 | 0.0137 | 0.1291 | 0.7163 | 0.6484 | 0.0024 | 0.0140 |        |
| T01b-White         |        |        | 0.7836 | 0.2539 | 0.9679 | 0.8336 | 0.0840 | 0.4291 | 0.7577 | 0.2672 | 0.0207 | 0.0940 |        |
| T02-White          |        |        |        | 0.1469 | 0.8048 | 0.9783 | 0.1034 | 0.5665 | 0.5507 | 0.1494 | 0.0188 | 0.1137 |        |
| T03-Blue           |        |        |        |        | 0.2226 | 0.2066 | 0.0076 | 0.0601 | 0.4028 | 0.9343 | 0.0020 | 0.0083 |        |
| T04a-Blue          |        |        |        |        |        | 0.8557 | 0.0718 | 0.4271 | 0.7175 | 0.2323 | 0.0146 | 0.0786 |        |
| T04b-Blue          |        |        |        |        |        |        | 0.1832 | 0.6140 | 0.6227 | 0.2166 | 0.0699 | 0.2127 |        |
| T05-Black          |        |        |        |        |        |        |        | 0.3189 | 0.0468 | 0.0058 | 0.4998 | 0.7865 |        |
| T06-Black          |        |        |        |        |        |        |        |        | 0.2764 | 0.0577 | 0.0975 | 0.3774 |        |
| T07-Red            |        |        |        |        |        |        |        |        |        | 0.4299 | 0.0114 | 0.0516 |        |
| T08-Red            |        |        |        |        |        |        |        |        |        |        | 0.0012 | 0.0061 |        |
| T09-Yellow         |        |        |        |        |        |        |        |        |        |        |        | 0.2230 |        |
| T11-Green          | 0.2017 | 0.5594 | 0.7219 | 0.0963 | 0.5664 | 0.7425 | 0.2687 | 0.8584 | 0.3810 | 0.0966 | 0.0918 | 0.3155 |        |
| T12-Green          | 0.4007 | 0.9150 | 0.8579 | 0.1972 | 0.9444 | 0.9018 | 0.0782 | 0.4615 | 0.6672 | 0.2044 | 0.0155 | 0.0855 | 0.6067 |
| Female Lung        |        |        |        |        |        |        |        |        |        |        |        |        |        |
| T01b-White         | 0.5989 |        |        |        |        |        |        |        |        |        |        |        |        |
| T02-White          | 0.4804 | 0.8770 |        |        |        |        |        |        |        |        |        |        |        |
| T03-Blue           | 0.2903 | 0.1118 | 0.0673 |        |        |        |        |        |        |        |        |        |        |
| T04a-Blue          | 0.1182 | 0.3118 | 0.3662 | 0.0071 |        |        |        |        |        |        |        |        |        |
| T04b-Blue          | 0.9900 | 0.5645 | 0.4314 | 0.2258 | 0.0784 |        |        |        |        |        |        |        |        |
| T05-Black          | 0.9943 | 0.5791 | 0.4522 | 0.2521 | 0.0936 | 0.9955 |        |        |        |        |        |        |        |
| T06-Black          | 0.0973 | 0.2419 | 0.2816 | 0.0082 | 0.7705 | 0.0700 | 0.0804 |        |        |        |        |        |        |
| T07-Red            | 0.0846 | 0.2250 | 0.2627 | 0.0056 | 0.7691 | 0.0565 | 0.0671 | 0.9897 |        |        |        |        |        |
| T08-Red            | 0.6772 | 0.8985 | 0.7683 | 0.1291 | 0.2363 | 0.6475 | 0.6602 | 0.1860 | 0.1686 |        |        |        |        |
| T09-Yellow         | 0.5417 | 0.2292 | 0.1451 | 0.5561 | 0.0147 | 0.4661 | 0.4989 | 0.0172 | 0.0118 | 0.2664 |        |        |        |
| T10-Yellow         | 0.1916 | 0.4695 | 0.5526 | 0.0121 | 0.7115 | 0.1351 | 0.1578 | 0.5346 | 0.5196 | 0.3699 | 0.0254 |        |        |
| T11-Green          | 0.2699 | 0.5658 | 0.6553 | 0.0295 | 0.6775 | 0.2211 | 0.2410 | 0.5189 | 0.5069 | 0.4699 | 0.0635 | 0.9271 |        |
| T12-Green          | 0.8311 | 0.7589 | 0.6355 | 0.2081 | 0.1875 | 0.8213 | 0.8254 | 0.1491 | 0.1345 | 0.8484 | 0.4008 | 0.2932 | 0.3808 |
| Female Spleen      |        |        |        |        |        |        |        |        |        |        |        |        |        |
| T01b-White         | 0.5492 |        |        |        |        |        |        |        |        |        |        |        |        |
| T02-White          | 0.7289 | 0.2937 |        |        |        |        |        |        |        |        |        |        |        |
| T03-Blue           | 0.8295 | 0.4588 | 0.9479 |        |        |        |        |        |        |        |        |        |        |
| T04a-Blue          | 0.1501 | 0.3516 | 0.0462 | 0.1470 |        |        |        |        |        |        |        |        |        |
| T04b-Blue          | 0.7928 | 0.3190 | 0.9104 | 0.9871 | 0.0467 |        |        |        |        |        |        |        |        |
| T05-Black          | 0.8887 | 0.6529 | 0.6163 | 0.7353 | 0.1956 | 0.6716 |        |        |        |        |        |        |        |
| T06-Black          | 0.1707 | 0.3895 | 0.0570 | 0.1630 | 0.9575 | 0.0584 | 0.2201 |        |        |        |        |        |        |
| T07-Red            | 0.4313 | 0.8405 | 0.2051 | 0.3678 | 0.4580 | 0.2204 | 0.5240 | 0.5006 |        |        |        |        |        |
| T08-Red            | 0.4574 | 0.8621 | 0.2324 | 0.3877 | 0.4657 | 0.2510 | 0.5498 | 0.5063 | 0.9843 |        |        |        |        |
| T09-Yellow         | 0.8977 | 0.4316 | 0.8169 | 0.9084 | 0.0896 | 0.8921 | 0.7810 | 0.1061 | 0.3209 | 0.3498 |        |        |        |
| T10-Yellow         | 0.8022 | 0.3052 | 0.8836 | 0.9710 | 0.0376 | 0.9767 | 0.6754 | 0.0485 | 0.2043 | 0.2374 | 0.9071 |        |        |
| T11-Green          | 0.4289 | 0.8078 | 0.2194 | 0.3652 | 0.5306 | 0.2368 | 0.5155 | 0.5709 | 0.9541 | 0.9412 | 0.3280 | 0.2248 |        |
| T12-Green          | 0.5188 | 0.2052 | 0.7110 | 0.7200 | 0.0395 | 0.6308 | 0.4343 | 0.0468 | 0.1468 | 0.1645 | 0.5749 | 0.6014 | 0.1557 |
| Female T11         |        |        |        |        |        |        |        |        |        |        |        |        |        |
| T01a               | T01b   | T02    | T03    | T04a   | T04b   | T05    | T06    | T07    | T08    | T09    | T10    | T11    |        |

**Infrared imageries of human body activated by tea match the hypothesis of meridian system**

**(Supplementary Table 4 Continued)**

| Female Colon   |        |        |        |        |        |        |        |        |        |        |        |        |        |     |
|----------------|--------|--------|--------|--------|--------|--------|--------|--------|--------|--------|--------|--------|--------|-----|
| T01b-White     | 0.5382 |        |        |        |        |        |        |        |        |        |        |        |        |     |
| T02-White      | 0.7344 | 0.7542 |        |        |        |        |        |        |        |        |        |        |        |     |
| T03-Blue       | 0.2408 | 0.0819 | 0.1231 |        |        |        |        |        |        |        |        |        |        |     |
| T04a-Blue      | 0.4687 | 0.1675 | 0.2546 | 0.5633 |        |        |        |        |        |        |        |        |        |     |
| T04b-Blue      | 0.5451 | 0.2283 | 0.3327 | 0.5566 | 0.9508 |        |        |        |        |        |        |        |        |     |
| T05-Black      | 0.7922 | 0.7145 | 0.9459 | 0.1506 | 0.3056 | 0.3819 |        |        |        |        |        |        |        |     |
| T06-Black      | 0.8204 | 0.6744 | 0.9070 | 0.1524 | 0.3122 | 0.3927 | 0.9642 |        |        |        |        |        |        |     |
| T07-Red        | 0.9911 | 0.5143 | 0.7137 | 0.2286 | 0.4551 | 0.5367 | 0.7747 | 0.8033 |        |        |        |        |        |     |
| T08-Red        | 0.1489 | 0.0365 | 0.0567 | 0.9256 | 0.4305 | 0.4420 | 0.0787 | 0.0770 | 0.1333 |        |        |        |        |     |
| T09-Yellow     | 0.7682 | 0.3543 | 0.5077 | 0.3533 | 0.6665 | 0.7394 | 0.5672 | 0.5865 | 0.7672 | 0.2392 |        |        |        |     |
| T10-Yellow     | 0.5582 | 0.2036 | 0.3106 | 0.4499 | 0.8521 | 0.9188 | 0.3698 | 0.3793 | 0.5462 | 0.3097 | 0.7838 |        |        |     |
| T11-Green      | 0.4366 | 0.1706 | 0.2518 | 0.6787 | 0.8959 | 0.8601 | 0.2949 | 0.3020 | 0.4255 | 0.5693 | 0.6079 | 0.7641 |        |     |
| T12-Green      | 0.3733 | 0.1165 | 0.1809 | 0.6378 | 0.8798 | 0.8424 | 0.2273 | 0.2299 | 0.3555 | 0.4986 | 0.5540 | 0.7217 | 0.9979 |     |
| Female Stomach |        | T01a   | T01b   | T02    | T03    | T04a   | T04b   | T05    | T06    | T07    | T08    | T09    | T10    | T11 |
| T01b-White     | 0.6503 |        |        |        |        |        |        |        |        |        |        |        |        |     |
| T02-White      | 0.5613 | 0.8721 |        |        |        |        |        |        |        |        |        |        |        |     |
| T03-Blue       | 0.2227 | 0.4176 | 0.5382 |        |        |        |        |        |        |        |        |        |        |     |
| T04a-Blue      | 0.5949 | 0.9023 | 0.9742 | 0.5256 |        |        |        |        |        |        |        |        |        |     |
| T04b-Blue      | 0.6855 | 0.9982 | 0.8857 | 0.4615 | 0.9127 |        |        |        |        |        |        |        |        |     |
| T05-Black      | 0.8413 | 0.7931 | 0.6846 | 0.2897 | 0.7182 | 0.8144 |        |        |        |        |        |        |        |     |
| T06-Black      | 0.9713 | 0.7112 | 0.6207 | 0.2781 | 0.6504 | 0.7350 | 0.8873 |        |        |        |        |        |        |     |
| T07-Red        | 0.7546 | 0.4936 | 0.4325 | 0.1837 | 0.4585 | 0.5277 | 0.6316 | 0.7497 |        |        |        |        |        |     |
| T08-Red        | 0.6594 | 0.9641 | 0.9195 | 0.4925 | 0.9455 | 0.9688 | 0.7840 | 0.7092 | 0.5092 |        |        |        |        |     |
| T09-Yellow     | 0.6755 | 0.3671 | 0.3206 | 0.1000 | 0.3538 | 0.4315 | 0.5198 | 0.6865 | 0.9977 | 0.4145 |        |        |        |     |
| T10-Yellow     | 0.3531 | 0.6293 | 0.7711 | 0.7188 | 0.7504 | 0.6668 | 0.4537 | 0.4228 | 0.2809 | 0.7030 | 0.1629 |        |        |     |
| T11-Green      | 0.6940 | 0.9960 | 0.8914 | 0.4763 | 0.9174 | 0.9979 | 0.8187 | 0.7407 | 0.5371 | 0.9717 | 0.4486 | 0.6793 |        |     |
| T12-Green      | 0.4156 | 0.7153 | 0.8576 | 0.6356 | 0.8342 | 0.7458 | 0.5277 | 0.4859 | 0.3255 | 0.7823 | 0.2015 | 0.9044 | 0.7563 |     |
| Female Thymus  |        | T01a   | T01b   | T02    | T03    | T04a   | T04b   | T05    | T06    | T07    | T08    | T09    | T10    | T11 |
| T01b-White     | 0.4388 |        |        |        |        |        |        |        |        |        |        |        |        |     |
| T02-White      | 0.5356 | 0.9053 |        |        |        |        |        |        |        |        |        |        |        |     |
| T03-Blue       | 0.9482 | 0.3841 | 0.4816 |        |        |        |        |        |        |        |        |        |        |     |
| T04a-Blue      | 0.9467 | 0.3872 | 0.4838 | 0.9979 |        |        |        |        |        |        |        |        |        |     |
| T04b-Blue      | 0.5507 | 0.8970 | 0.9904 | 0.4977 | 0.4997 |        |        |        |        |        |        |        |        |     |
| T05-Black      | 0.4135 | 0.9930 | 0.9057 | 0.3552 | 0.3590 | 0.8971 |        |        |        |        |        |        |        |     |
| T06-Black      | 0.7869 | 0.5968 | 0.7042 | 0.7276 | 0.7281 | 0.7189 | 0.5759 |        |        |        |        |        |        |     |
| T07-Red        | 0.8602 | 0.4961 | 0.6095 | 0.7977 | 0.7977 | 0.6265 | 0.4655 | 0.9070 |        |        |        |        |        |     |
| T08-Red        | 0.7309 | 0.6487 | 0.7568 | 0.6707 | 0.6718 | 0.7709 | 0.6307 | 0.9394 | 0.8425 |        |        |        |        |     |
| T09-Yellow     | 0.9986 | 0.4643 | 0.5563 | 0.9495 | 0.9480 | 0.5703 | 0.4429 | 0.7994 | 0.8700 | 0.7461 |        |        |        |     |
| T10-Yellow     | 0.1820 | 0.5747 | 0.5161 | 0.1453 | 0.1487 | 0.5162 | 0.5378 | 0.2666 | 0.1888 | 0.2994 | 0.2083 |        |        |     |
| T11-Green      | 0.5744 | 0.8228 | 0.9266 | 0.5156 | 0.5179 | 0.9380 | 0.8167 | 0.7600 | 0.6580 | 0.8174 | 0.5960 | 0.4270 |        |     |
| T12-Green      | 0.3880 | 0.9044 | 0.8190 | 0.3384 | 0.3414 | 0.8125 | 0.8912 | 0.5288 | 0.4357 | 0.5758 | 0.4127 | 0.6785 | 0.7367 |     |
| Female Liver   |        | T01a   | T01b   | T02    | T03    | T04a   | T04b   | T05    | T06    | T07    | T08    | T09    | T10    | T11 |
| T01b-White     | 0.7037 |        |        |        |        |        |        |        |        |        |        |        |        |     |
| T02-White      | 0.2445 | 0.3277 |        |        |        |        |        |        |        |        |        |        |        |     |
| T03-Blue       | 0.3669 | 0.4908 | 0.9889 |        |        |        |        |        |        |        |        |        |        |     |
| T04a-Blue      | 0.8611 | 0.5152 | 0.1279 | 0.2634 |        |        |        |        |        |        |        |        |        |     |
| T04b-Blue      | 0.4807 | 0.2323 | 0.0541 | 0.1317 | 0.5437 |        |        |        |        |        |        |        |        |     |
| T05-Black      | 0.3177 | 0.4326 | 0.9690 | 0.9858 | 0.2032 | 0.0924 |        |        |        |        |        |        |        |     |
| T06-Black      | 0.9019 | 0.7944 | 0.2716 | 0.4069 | 0.7461 | 0.3884 | 0.3543 |        |        |        |        |        |        |     |
| T07-Red        | 0.2845 | 0.0739 | 0.0091 | 0.0618 | 0.3035 | 0.7942 | 0.0301 | 0.1986 |        |        |        |        |        |     |
| T08-Red        | 0.8850 | 0.5549 | 0.1527 | 0.2840 | 0.9780 | 0.5409 | 0.2269 | 0.7750 | 0.3133 |        |        |        |        |     |
| T09-Yellow     | 0.5507 | 0.7639 | 0.5692 | 0.6732 | 0.3935 | 0.1833 | 0.6449 | 0.6174 | 0.0672 | 0.4261 |        |        |        |     |
| T10-Yellow     | 0.2337 | 0.3127 | 0.9339 | 0.9395 | 0.1265 | 0.0542 | 0.9131 | 0.2594 | 0.0108 | 0.1491 | 0.5347 |        |        |     |
| T11-Green      | 0.8673 | 0.8951 | 0.4208 | 0.5090 | 0.7428 | 0.4355 | 0.4789 | 0.9466 | 0.2821 | 0.7646 | 0.7334 | 0.3986 |        |     |
| T12-Green      | 0.5205 | 0.7121 | 0.6580 | 0.7371 | 0.3780 | 0.1820 | 0.7198 | 0.5811 | 0.0761 | 0.4070 | 0.9343 | 0.6188 | 0.6926 |     |
| Female Thyroid |        | T01a   | T01b   | T02    | T03    | T04a   | T04b   | T05    | T06    | T07    | T08    | T09    | T10    | T11 |
| T01b-White     | 0.3478 |        |        |        |        |        |        |        |        |        |        |        |        |     |
| T02-White      | 0.0637 | 0.2532 |        |        |        |        |        |        |        |        |        |        |        |     |
| T03-Blue       | 0.7524 | 0.2127 | 0.0358 |        |        |        |        |        |        |        |        |        |        |     |
| T04a-Blue      | 0.4394 | 0.9607 | 0.3292 | 0.2905 |        |        |        |        |        |        |        |        |        |     |
| T04b-Blue      | 0.6815 | 0.1752 | 0.0275 | 0.9278 | 0.2490 |        |        |        |        |        |        |        |        |     |
| T05-Black      | 0.3667 | 0.9960 | 0.2883 | 0.2292 | 0.9590 | 0.1910 |        |        |        |        |        |        |        |     |
| T06-Black      | 0.9088 | 0.3878 | 0.0659 | 0.6610 | 0.4876 | 0.5906 | 0.4086 |        |        |        |        |        |        |     |
| T07-Red        | 0.6226 | 0.6341 | 0.1273 | 0.4173 | 0.7239 | 0.3600 | 0.6492 | 0.6942 |        |        |        |        |        |     |
| T08-Red        | 0.9209 | 0.2798 | 0.0436 | 0.8206 | 0.3741 | 0.7463 | 0.3001 | 0.8247 | 0.5392 |        |        |        |        |     |
| T09-Yellow     | 0.4575 | 0.9659 | 0.3597 | 0.3087 | 0.9974 | 0.2670 | 0.9640 | 0.5062 | 0.7350 | 0.3941 |        |        |        |     |
| T10-Yellow     | 0.4523 | 0.8691 | 0.2244 | 0.2905 | 0.9268 | 0.2455 | 0.8724 | 0.5047 | 0.7716 | 0.3790 | 0.9278 |        |        |     |
| T11-Green      | 0.1395 | 0.4785 | 0.7304 | 0.0815 | 0.5224 | 0.0650 | 0.5063 | 0.1515 | 0.2693 | 0.1047 | 0.5466 | 0.4155 |        |     |
| T12-Green      | 0.0185 | 0.0724 | 0.4364 | 0.0106 | 0.1230 | 0.0079 | 0.0908 | 0.0181 | 0.0354 | 0.0120 | 0.1441 | 0.0683 | 0.3015 |     |

**Infrared imageries of human body activated by tea match the hypothesis of meridian system**

**(Supplementary Table 4 Continued)**

| Female Gallbladder |        |        |        |        |        |        |        |        |        |        |        |        |        |     |
|--------------------|--------|--------|--------|--------|--------|--------|--------|--------|--------|--------|--------|--------|--------|-----|
| T01b-White         | 0.8846 |        |        |        |        |        |        |        |        |        |        |        |        |     |
| T02-White          | 0.9581 | 0.9218 |        |        |        |        |        |        |        |        |        |        |        |     |
| T03-Blue           | 0.8522 | 0.7633 | 0.8165 |        |        |        |        |        |        |        |        |        |        |     |
| T04a-Blue          | 0.5207 | 0.4589 | 0.4868 | 0.6948 |        |        |        |        |        |        |        |        |        |     |
| T04b-Blue          | 0.2777 | 0.2439 | 0.2528 | 0.4336 | 0.6869 |        |        |        |        |        |        |        |        |     |
| T05-Black          | 0.3680 | 0.3220 | 0.3365 | 0.5493 | 0.8451 | 0.8210 |        |        |        |        |        |        |        |     |
| T06-Black          | 0.8206 | 0.7314 | 0.7835 | 0.9763 | 0.7097 | 0.4394 | 0.5590 |        |        |        |        |        |        |     |
| T07-Red            | 0.3521 | 0.3050 | 0.3118 | 0.5829 | 0.9336 | 0.6874 | 0.8791 | 0.5935 |        |        |        |        |        |     |
| T08-Red            | 0.2341 | 0.2052 | 0.2091 | 0.3995 | 0.6585 | 0.9887 | 0.7975 | 0.4035 | 0.6469 |        |        |        |        |     |
| T09-Yellow         | 0.3993 | 0.5042 | 0.4181 | 0.3748 | 0.1841 | 0.0832 | 0.1096 | 0.3439 | 0.0809 | 0.0611 |        |        |        |     |
| T10-Yellow         | 0.3696 | 0.4639 | 0.3864 | 0.3476 | 0.1741 | 0.0809 | 0.1065 | 0.3195 | 0.0833 | 0.0613 | 0.9186 |        |        |     |
| T11-Green          | 0.1438 | 0.1999 | 0.1498 | 0.1533 | 0.0657 | 0.0274 | 0.0352 | 0.1348 | 0.0228 | 0.0187 | 0.5074 | 0.5925 |        |     |
| T12-Green          | 0.8549 | 0.9558 | 0.8865 | 0.7481 | 0.4752 | 0.2732 | 0.3526 | 0.7202 | 0.3543 | 0.2415 | 0.5949 | 0.5488 | 0.2740 |     |
| Female Heart       |        | T01a   | T01b   | T02    | T03    | T04a   | T04b   | T05    | T06    | T07    | T08    | T09    | T10    | T11 |
| T01b-White         | 0.1421 |        |        |        |        |        |        |        |        |        |        |        |        |     |
| T02-White          | 0.0802 | 0.8547 |        |        |        |        |        |        |        |        |        |        |        |     |
| T03-Blue           | 0.5314 | 0.3459 | 0.2256 |        |        |        |        |        |        |        |        |        |        |     |
| T04a-Blue          | 0.0799 | 0.7915 | 0.9232 | 0.2151 |        |        |        |        |        |        |        |        |        |     |
| T04b-Blue          | 0.1069 | 0.9262 | 0.9269 | 0.2799 | 0.8567 |        |        |        |        |        |        |        |        |     |
| T05-Black          | 0.2927 | 0.6985 | 0.5547 | 0.6101 | 0.5145 | 0.6230 |        |        |        |        |        |        |        |     |
| T06-Black          | 0.1293 | 0.9331 | 0.9290 | 0.3140 | 0.8627 | 0.9973 | 0.6446 |        |        |        |        |        |        |     |
| T07-Red            | 0.0958 | 0.8671 | 0.9932 | 0.2529 | 0.9202 | 0.9369 | 0.5763 | 0.9381 |        |        |        |        |        |     |
| T08-Red            | 0.1390 | 0.9042 | 0.7396 | 0.3629 | 0.6806 | 0.8202 | 0.7621 | 0.8351 | 0.7593 |        |        |        |        |     |
| T09-Yellow         | 0.7888 | 0.2007 | 0.1163 | 0.7065 | 0.1147 | 0.1532 | 0.3981 | 0.1822 | 0.1374 | 0.2003 |        |        |        |     |
| T10-Yellow         | 0.2969 | 0.6737 | 0.5279 | 0.6237 | 0.4897 | 0.5970 | 0.9786 | 0.6204 | 0.5509 | 0.7350 | 0.4053 |        |        |     |
| T11-Green          | 0.0398 | 0.6871 | 0.8199 | 0.1286 | 0.9120 | 0.7514 | 0.4084 | 0.7668 | 0.8231 | 0.5542 | 0.0579 | 0.3813 |        |     |
| T12-Green          | 0.0116 | 0.2833 | 0.3339 | 0.0378 | 0.4083 | 0.3068 | 0.1512 | 0.3354 | 0.3524 | 0.1961 | 0.0165 | 0.1367 | 0.4122 |     |
| Female Kidney      |        | T01a   | T01b   | T02    | T03    | T04a   | T04b   | T05    | T06    | T07    | T08    | T09    | T10    | T11 |
| T01b-White         | 0.8078 |        |        |        |        |        |        |        |        |        |        |        |        |     |
| T02-White          | 0.4625 | 0.6803 |        |        |        |        |        |        |        |        |        |        |        |     |
| T03-Blue           | 0.6279 | 0.4770 | 0.1686 |        |        |        |        |        |        |        |        |        |        |     |
| T04a-Blue          | 0.3252 | 0.2451 | 0.0691 | 0.5494 |        |        |        |        |        |        |        |        |        |     |
| T04b-Blue          | 0.2114 | 0.1605 | 0.0468 | 0.3564 | 0.7145 |        |        |        |        |        |        |        |        |     |
| T05-Black          | 0.9003 | 0.7109 | 0.3556 | 0.7064 | 0.3624 | 0.2336 |        |        |        |        |        |        |        |     |
| T06-Black          | 0.6004 | 0.7822 | 0.9414 | 0.3242 | 0.1621 | 0.1065 | 0.5120 |        |        |        |        |        |        |     |
| T07-Red            | 0.4792 | 0.3624 | 0.1159 | 0.7853 | 0.7440 | 0.5021 | 0.5374 | 0.2432 |        |        |        |        |        |     |
| T08-Red            | 0.3139 | 0.2350 | 0.0575 | 0.5425 | 0.9833 | 0.6905 | 0.3500 | 0.1534 | 0.7482 |        |        |        |        |     |
| T09-Yellow         | 0.9440 | 0.8674 | 0.5381 | 0.5933 | 0.3137 | 0.2059 | 0.8474 | 0.6595 | 0.4566 | 0.3038 |        |        |        |     |
| T10-Yellow         | 0.7921 | 0.9792 | 0.7133 | 0.4738 | 0.2479 | 0.1634 | 0.6984 | 0.8068 | 0.3627 | 0.2387 | 0.8501 |        |        |     |
| T11-Green          | 0.3452 | 0.5132 | 0.7321 | 0.1380 | 0.0608 | 0.0405 | 0.2679 | 0.7306 | 0.0979 | 0.0535 | 0.4034 | 0.5425 |        |     |
| T12-Green          | 0.6149 | 0.4710 | 0.1803 | 0.9640 | 0.5962 | 0.3943 | 0.6890 | 0.3237 | 0.8295 | 0.5930 | 0.5819 | 0.4676 | 0.1442 |     |
| Female Duodenum    |        | T01a   | T01b   | T02    | T03    | T04a   | T04b   | T05    | T06    | T07    | T08    | T09    | T10    | T11 |
| T01b-White         | 0.4049 |        |        |        |        |        |        |        |        |        |        |        |        |     |
| T02-White          | 0.8554 | 0.4594 |        |        |        |        |        |        |        |        |        |        |        |     |
| T03-Blue           | 0.8161 | 0.2745 | 0.6584 |        |        |        |        |        |        |        |        |        |        |     |
| T04a-Blue          | 0.6677 | 0.5986 | 0.7841 | 0.4798 |        |        |        |        |        |        |        |        |        |     |
| T04b-Blue          | 0.3864 | 0.8697 | 0.4370 | 0.2771 | 0.5493 |        |        |        |        |        |        |        |        |     |
| T05-Black          | 0.7869 | 0.5262 | 0.9191 | 0.5968 | 0.8714 | 0.4900 |        |        |        |        |        |        |        |     |
| T06-Black          | 0.4834 | 0.9032 | 0.5544 | 0.3407 | 0.7084 | 0.7930 | 0.6240 |        |        |        |        |        |        |     |
| T07-Red            | 0.3388 | 0.9424 | 0.3760 | 0.2163 | 0.5046 | 0.9078 | 0.4432 | 0.8403 |        |        |        |        |        |     |
| T08-Red            | 0.6985 | 0.2349 | 0.5538 | 0.8632 | 0.4025 | 0.2374 | 0.5022 | 0.2896 | 0.1878 |        |        |        |        |     |
| T09-Yellow         | 0.6201 | 0.1309 | 0.4361 | 0.8109 | 0.2626 | 0.1611 | 0.3822 | 0.1832 | 0.0819 | 0.9769 |        |        |        |     |
| T10-Yellow         | 0.9757 | 0.3896 | 0.8714 | 0.7812 | 0.6673 | 0.3775 | 0.7974 | 0.4737 | 0.3158 | 0.6626 | 0.5684 |        |        |     |
| T11-Green          | 0.8122 | 0.2717 | 0.6542 | 0.9961 | 0.4757 | 0.2747 | 0.5927 | 0.3376 | 0.2136 | 0.8666 | 0.8149 | 0.7771 |        |     |
| T12-Green          | 0.9404 | 0.2961 | 0.7661 | 0.8514 | 0.5472 | 0.3056 | 0.6905 | 0.3777 | 0.2203 | 0.7182 | 0.6209 | 0.9079 | 0.8470 |     |
| Female Bladder     |        | T01a   | T01b   | T02    | T03    | T04a   | T04b   | T05    | T06    | T07    | T08    | T09    | T10    | T11 |
| T01b-White         | 0.4143 |        |        |        |        |        |        |        |        |        |        |        |        |     |
| T02-White          | 0.8722 | 0.3186 |        |        |        |        |        |        |        |        |        |        |        |     |
| T03-Blue           | 0.6269 | 0.7759 | 0.5175 |        |        |        |        |        |        |        |        |        |        |     |
| T04a-Blue          | 0.3358 | 0.9088 | 0.2476 | 0.6875 |        |        |        |        |        |        |        |        |        |     |
| T04b-Blue          | 0.1022 | 0.4326 | 0.0652 | 0.3000 | 0.4871 |        |        |        |        |        |        |        |        |     |
| T05-Black          | 0.5754 | 0.7843 | 0.4593 | 0.9752 | 0.6882 | 0.2774 |        |        |        |        |        |        |        |     |
| T06-Black          | 0.9317 | 0.3395 | 0.9321 | 0.5523 | 0.2629 | 0.0671 | 0.4916 |        |        |        |        |        |        |     |
| T07-Red            | 0.6919 | 0.6777 | 0.5713 | 0.9122 | 0.5857 | 0.2252 | 0.8793 | 0.6113 |        |        |        |        |        |     |
| T08-Red            | 0.2125 | 0.7266 | 0.1432 | 0.5245 | 0.8113 | 0.6214 | 0.5104 | 0.1498 | 0.4225 |        |        |        |        |     |
| T09-Yellow         | 0.3462 | 0.0876 | 0.4124 | 0.1803 | 0.0601 | 0.0119 | 0.1369 | 0.3504 | 0.1913 | 0.0275 |        |        |        |     |
| T10-Yellow         | 0.6036 | 0.1664 | 0.7154 | 0.3215 | 0.1167 | 0.0229 | 0.2581 | 0.6342 | 0.3493 | 0.0539 | 0.5937 |        |        |     |
| T11-Green          | 0.6861 | 0.6109 | 0.5472 | 0.8705 | 0.5088 | 0.1598 | 0.8286 | 0.5891 | 0.9651 | 0.3341 | 0.1499 | 0.2948 |        |     |
| T12-Green          | 0.6129 | 0.7256 | 0.4898 | 0.9728 | 0.6273 | 0.2350 | 0.9428 | 0.5251 | 0.9313 | 0.4497 | 0.1434 | 0.2733 | 0.8848 |     |
